# 1 “Neighbourhood watch” model: embryonic epiblast cells assess positional 2 information in relation to their neighbours

- 3
- 4 • Running title: **Neighbourhood watch model**

5  
6 Hyung Chul Lee<sup>1†</sup>, Cato Hastings<sup>1†</sup>, Nidia M.M. Oliveira<sup>1</sup>, Rubén Pérez-Carrasco<sup>2</sup>,  
7 Karen M. Page<sup>3</sup>, Lewis Wolpert<sup>1‡</sup> and Claudio D. Stern<sup>1\*</sup>

8  
9 <sup>1</sup>Department of Cell and Developmental Biology, University College London,  
10 Gower Street, London WC1E 6BT, UK.

11 <sup>2</sup>Department of Life Sciences, Imperial College London, South Kensington  
12 Campus, London SW7 2AZ, U.K.

13 <sup>3</sup>Department of Mathematics, University College London, Gower Street, London  
14 WC1E 6BT, U.K.

15 † These authors contributed equally.

16 ‡ Deceased 28 Jan 2021

17 \* correspondence to: [c.stern@ucl.ac.uk](mailto:c.stern@ucl.ac.uk)

18  
19 **Keywords:** morphogen, chick embryo, polarity, primitive streak, gastrulation, cell  
20 communication, SMAD

21  
22 **Summary statement:** In a large developing system, the chick embryo before  
23 gastrulation, cells interpret gradients of positional signals relative to their neighbours to  
24 position the primitive streak, establishing bilateral symmetry.

## 25 26 **Abstract**

27 In many developing and regenerating systems, tissue pattern is established  
28 through gradients of informative morphogens, but we know little about how cells  
29 interpret these. Using experimental manipulation of early chick embryos including  
30 misexpression of an inducer (VG1 or ACTIVIN) and an inhibitor (BMP4), we test  
31 two alternative models for their ability to explain how the site of primitive streak  
32 formation is positioned relative to the rest of the embryo. In one model, cells read  
33 morphogen concentrations cell-autonomously. In the other, cells sense changes  
34 in morphogen status relative to their neighbourhood. We find that only the latter  
35 model can account for the experimental results, including some counter-intuitive  
36 predictions. This mechanism (which we name “neighbourhood watch” model)  
37 illuminates the classic “French Flag Problem” and how positional information is  
38 interpreted by a sheet of cells in a large developing system.

## 39 40 41 **Introduction**

42 In the late 1960s, Lewis Wolpert introduced the concept of “positional  
43 information”, asking the question of how cells within a morphogenetic field could  
44 adopt several cell-type identities in response to signalling cues from the embryo.  
45 The analogy of a French flag, with three colours: red, white and blue, was used to  
46 symbolise the cell types (Wolpert, 1968, Wolpert, 1969). Wolpert proposed that a  
47 gradient of a hypothetical “morphogen” diffusing away from a local source and  
48 decaying with distance would be read by cells, which respond with discrete

49 thresholds to adopt the various identities. He named this the “French Flag  
50 problem”.

51 Since, several systems have been found in which a morphogen imparts positional  
52 information resulting in a defined morphological pattern. These include head and  
53 foot formation in Hydra (Schaller, 1973, Bode, 2011), patterning of the wing  
54 (Lecuit et al., 1996), leg and antenna imaginal discs of the fly (Postlethwait and  
55 Schneiderman, 1971) and limb regeneration in vertebrates (Kumar et al., 2007).  
56 Various mechanisms have been studied by which cells might interpret such  
57 morphogen gradients so that their positions are defined precisely and robustly. In  
58 cultured cells and explant systems (Gurdon et al., 1999, Gurdon et al., 1995) it  
59 has been shown that cells respond directly to morphogen concentration, in a  
60 manner most similar to that described by Wolpert (Wolpert, 1969). In vertebrate  
61 neural tube patterning, the gradient of Shh is transformed into a dynamic profile of  
62 Gli (a transcription factor) to generate spatial patterns of downstream gene  
63 expression, suggesting that cells interpret positional information using intracellular  
64 regulatory networks, where a temporal element is important (Dessaud et al., 2010,  
65 Cohen et al., 2013). The *bicoid* gradient, which sets up the anterior–posterior axis  
66 in fruit fly embryos has been studied extensively (Driever and Nusslein-Volhard,  
67 1988b, Driever and Nusslein-Volhard, 1988a, Gregor et al., 2007b, Gregor et al.,  
68 2007a) and it has been suggested that spatial averaging across nuclei is one  
69 mechanism by which noise is reduced in the transduction of the *bicoid* signal  
70 (Gregor et al., 2007a).

71 All the above systems are relatively small (<100 cell diameters) (Wolpert, 1969)  
72 allowing stable gradients to be set up which span the entire field. However, some  
73 developing systems are much larger in size, begging the question of what  
74 mechanisms cells might use to assess their positions. An example of such a large  
75 system is the early chick embryo just before the onset of gastrulation. The embryo  
76 contains as many as 20,000-50,000 cells and is approximately 3mm in diameter.  
77 Within this large field the primitive streak, the site of gastrulation, can arise at any  
78 point around the circumference. Any isolated fragment of this large embryo can  
79 initiate primitive streak formation; however, only one primitive streak forms,  
80 suggesting the existence of patterning events that coordinate cell behaviours  
81 across the whole field.

82 In these early embryos, the “pattern” is established in the marginal zone, a ring-  
83 like region of extraembryonic tissue, lying just outside of the central disk-like area  
84 pellucida, where the embryo will arise. The primitive streak, the first indication of  
85 the future midline of the embryo, arises at one edge of the inner area pellucida,  
86 adjacent to the posterior part of the marginal zone, where the TGF $\beta$ -related  
87 signalling molecule cVG1 is expressed. Previous studies have shown that  
88 positioning of the primitive streak requires “positive” inducing signals by  
89 cVG1/NODAL from the posterior marginal zone near the site of streak formation,  
90 and that this is antagonised by BMP signalling which is highest at the opposite  
91 (anterior) end of the blastoderm (Fig. S1A) (Shah et al., 1997, Streit et al., 1998,  
92 Bertocchini and Stern, 2012, Streit and Stern, 1999, Bertocchini and Stern, 2002,  
93 Skromne and Stern, 2002, Bertocchini et al., 2004). The distance between the two  
94 extremes of the marginal zone is approximately 300 cell diameters. Previous  
95 studies suggested that these signals are part of a “global positioning system” to

96 establish polarity in the chick embryo, (Bertocchini and Stern, 2012, Arias et al.,  
97 2017), and therefore that the whole embryo is a coordinated system of positional  
98 information.

99 To find out how cells interpret morphogen concentrations to generate positional  
100 information, we designed two computational models to represent respectively a  
101 fixed gradient, read locally by cells, or a system where cells compare themselves  
102 to their neighbours to determine their position in the field. Using a combination of  
103 embryological manipulations and computational modelling, we ask which of these  
104 two models can best account for the results of various manipulations in the spatial  
105 distribution, number and intensity of the inducing (cVG1/NODAL) and inhibitory  
106 (BMP) signals. We find that the “positional information” that determines the site of  
107 primitive streak formation is explained better by a mechanism by which cells  
108 compare themselves to their neighbours rather than by a cell autonomous  
109 assessment of gradients. We name this the “neighbourhood watch” model.

110

111

## 112 Results

### 113 Epiblast cells may sense local differences in strength of inducing signal 114 rather than the absolute amount of inducer

115 When a small pellet of *cVG1*-expressing cells (HEK293T cells transfected with a  
116 *cVG1*-expression construct) is grafted into the anterior marginal zone (the  
117 innermost extraembryonic epiblast, just outside the central embryonic area  
118 pellucida), it can initiate formation of an ectopic primitive streak that eventually  
119 develops into a full embryonic axis (Shah et al., 1997, Skromne and Stern, 2002).  
120 However endogenous *cVG1* mRNA is expressed as a crescent encompassing an  
121 arc of about 60° in the posterior marginal zone (Fig. S1A). To mimic this  
122 distribution more closely, as well as to test the effects of greater concentration of  
123 *cVG1* inducing signal, we placed two *cVG1*-expressing cell pellets side-by-side in  
124 the anterior marginal zone, and assessed primitive streak formation by in situ  
125 hybridisation for expression of *BRACHYURY* (*cBRA*, =*TBXT*) after overnight  
126 culture (Fig. 1 A-D). Only a single ectopic primitive streak was generated near the  
127 middle of the two *cVG1* pellets (Fig. 1 B); neither double nor thicker ectopic  
128 streaks were observed, similar to the effects of implanting a single pellet.

129 To provide a stronger and wider signal, we tested the effect of implanting four  
130 *cVG1*-expressing cell pellets side-by-side in the anterior marginal zone.  
131 Surprisingly, in the majority of cases (11/16 embryos), no ectopic primitive streak  
132 formed and no ectopic *cBRA* expression was seen (Fig. 1 E, H, K). Since  
133 application of the equivalent of a quad-dose of inducer spread over a four-fold  
134 wider area does not cause either more efficient or wider induction than a single  
135 dose, we speculated that “boundaries” to the signalling domain may be required.  
136 To test this, we placed a control cell pellet (HEK293T cells transfected with pCA $\beta$ -  
137 GFP; see Methods) to split four *cVG1*-expressing cell pellets into two groups on  
138 either side. The incidence of ectopic streak formation doubled (Fig. 1 F, I, K). If a  
139 boundary is indeed important, we might expect that, perhaps paradoxically,  
140 ectopic streak induction might increase if a pellet expressing the inhibitor BMP4  
141 (rather than a control pellet) is used to interrupt the set of four *cVG1*-expressing  
142 cell pellets. This is indeed the case (Fig. 1 G, J, K). Together, these results  
143 suggest that cells may sense variations in signal strength in relation to their  
144 neighbours, rather than measuring the absolute amount of local signal they  
145 receive, to determine the outcome of the inductive event.

146 The above experiments were done using pellets of transfected cells, as in  
147 previous studies (Bertocchini et al., 2004, Bertocchini and Stern, 2012, Shah et  
148 al., 1997, Skromne and Stern, 2002, Streit et al., 1998, Torlopp et al., 2014). One  
149 problem with this approach is that cells are likely to express other (unknown)  
150 factors that could influence the outcome of the signalling event. Another problem  
151 is that these pellets are relatively large (500-1000 cells). We therefore decided to  
152 substitute the use of cell pellets with protein-soaked microbeads (about 100  $\mu$ m  
153 diameter). As neither *VG1* nor *NODAL* are available as pure proteins, we decided  
154 to use *ACTIVIN* instead, which can induce axial structures and mesendodermal  
155 markers in chick epiblast (Mitrani et al., 1990, Stern et al., 1995). As shown in

156 amphibian animal cap ectoderm explants (Green and Smith, 1990), ACTIVIN also  
157 acts through the SMAD 2/3 pathway and generates finely graded responses of  
158 mesendoderm induction to different concentrations (Stern et al., 1995). BMP4-  
159 soaked beads were used as a source of inhibitory signal. First, we checked if a  
160 single soaked bead can mimic the effects of a single cell pellet (Fig. S2). Grafting  
161 a bead soaked in ACTIVIN into the anterior marginal zone has the same effect as  
162 a cell pellet placed in the same position: it induces an ectopic *cBRA*-expressing  
163 primitive streak in adjacent epiblast (Fig. S2, A-E). Conversely, placing a bead of  
164 the inhibitor BMP4 in the posterior marginal zone results in either displacement of  
165 the endogenous primitive streak to a more lateral position, or two primitive  
166 streaks, arising either side of the BMP4-bead (Fig. S2, F-J). With a high  
167 concentration of BMP4 (50 ng/ $\mu$ l) primitive streak formation was abolished in  
168 about half of the embryos (Fig. S2J).

169 Next, we mirrored the experiments done with two or more cell pellets but using  
170 soaked beads (Fig. 2). After grafting a single ACTIVIN protein-soaked bead  
171 flanked by two control beads, 43% of embryos (6/14) had ectopic *cBRA*  
172 expression (Fig. 2, B, G, K). When three ACTIVIN beads were grafted in a row to  
173 expose a wide domain to the inducing signal, the majority of embryos (78%, 7/9)  
174 showed no ectopic *cBRA* expression (Fig. 2, C, H, K). When boundaries to the  
175 signalling domain were generated either by introducing a BSA-soaked control  
176 bead (Fig. 2, D and I) or a BMP4-soaked bead (Fig. 2, E and J) among the  
177 ACTIVIN beads, the proportion of embryos with ectopic *cBRA* expression was  
178 restored, to 40% (4/10) and 50% (6/12) respectively (Fig. 2 K). Therefore, as with  
179 experiments using cell pellets, these results suggest that cells may sense  
180 inducing signals relative to their neighbours, rather than the absolute local amount  
181 of inducing signal.

## 182 **Two alternative models**

183 To distinguish between the two alternative mechanisms of how cells might sense  
184 their positions (absolute local morphogen concentration or comparison of local  
185 signal strength in relation to their neighbourhood), two mathematical models were  
186 designed, one for each of these mechanisms, to make experimentally-testable  
187 predictions (for details see Materials and Methods). We model the marginal zone  
188 as a one-dimensional ring of cells (Fig. 3 A). Positional information is provided by  
189 the balance between an inducer (SMAD2/3 activation in response to a  
190 VG1/ACTIVIN/NODAL-type signal) and an inhibitor (SMAD 1/5/8 in response to a  
191 BMP signal) within each cell (Fig. 3 B). Model A proposes that each cell  
192 independently assesses the concentration of morphogens (inducer vs. inhibitor) it  
193 receives: when a threshold is exceeded, the cell is triggered to start primitive  
194 streak formation. Model B proposes that cells communicate with their neighbours  
195 to assess how the streak-inducing signal changes in space: each cell in the ring  
196 compares itself with the average signal strength in its neighbourhood to determine  
197 whether or not to initiate streak formation (Fig. 3 B).

198 As an initial test of the model comparison method, we asked whether there exist  
199 parameter values allowing both models to replicate the experimental results  
200 shown in Fig. 2. We automated the search for parameter values using Bayesian  
201 computation, which scores values with a 'likelihood function' (Fig. S3). This



202 function quantifies how well the predicted number and position of ectopic streaks  
203 match experimental results on a cell-by-cell basis. All parameter values found  
204 were tested for their ability to predict the initiation of ectopic primitive streaks in  
205 the appropriate locations in terms of ‘success’ or ‘failure’ of the predictions of each  
206 model for each embryonic manipulation. While many parameter values yielded the  
207 same model success rates in the 5 experiments illustrated in Fig. 3 C-G (where  
208 ‘target streak’ is the experimental result), the likelihood function (Fig. S4) allowed  
209 further discrimination. Fig. 3 C-G illustrates the output of each simulation when  
210 run with a set of parameter values that provides both the greatest success rate for  
211 each model and the highest likelihood score. Even when the parameters were  
212 chosen to favour Model A, no set of parameter values was found that allowed  
213 Model A to replicate both experimental results in Fig. 3 C, D (the consequences of  
214 placing one or three beads of inducer in the anterior marginal zone). In contrast,  
215 Model B successfully predicts that broadening the domain of ectopic inducer  
216 reduces the chance of initiating ectopic streak formation (Fig. 3 D), even for a set  
217 of parameters favouring Model A.

218 The two models also differ in their ability to portray the effects of placing a bead of  
219 inhibitor between two beads of inducer (Fig. 3 E-G). Model A predicts that the  
220 presence of the inhibitor will reduce the likelihood of ectopic streaks (Fig. 3 E, F).  
221 However, Model B correctly predicts that only low dose of inhibitor increases the  
222 chance of forming an ectopic streak (Fig. 3 F, G). The same results were obtained  
223 irrespective of whether the sources of inducer and inhibitor were of small diameter  
224 (Fig. 3 C-G, to simulate microbeads as in Fig. 2) or wider (Fig. S5, simulating a  
225 cell pellet as in Fig. 1).

226 We sought a single set of bead parameters that would allow both models to mimic  
227 the experimental findings (Fig. 3 H). However, choosing a single set of bead  
228 parameters could act as a constraint, giving an advantage to one of the models.  
229 Therefore, we also performed the parameter inference to allow bead parameters  
230 to vary for each model independently (Fig 3 I). Strikingly, Model B always  
231 outperforms Model A, regardless of whether a single set of parameters is chosen  
232 to fit both models, or whether parameter values are optimised for each model  
233 separately (Fig. 3 J).

## 234 **Challenging the models and testing predictions**

### 235 **a. Decreasing the amount of inhibitor**

236 In both models, cells measure their position by assessing the relative strength of  
237 the intracellular downstream effectors of the inducers (VG1/NODAL/ACTIVIN) and  
238 inhibitors (BMP). Therefore, decreasing the streak-inhibiting signal alone should  
239 induce ectopic primitive streak formation. In this case, both models predict this  
240 outcome (Fig. 4 A and B).

241 To test these predictions experimentally, we used dorsomorphin, an inhibitor of  
242 BMP signalling (Yu et al., 2008). A dorsomorphin-soaked bead was grafted in the  
243 anterior marginal zone (Fig. 4 A). After overnight culture, an ectopic primitive  
244 streak (with *cBRA* expression) was seen to arise close to the bead (Fig. 4 C and  
245 D). This result is consistent with a previous study showing that a graft of a cell

246 pellet expressing the BMP antagonist CHORDIN in the area pellucida induces an  
247 ectopic streak (Streit et al., 1998). When embryos that had been grafted with a  
248 dorsomorphin-bead were examined 6 hours after the graft, ectopic expression of  
249 *cVG1* mRNA in the area pellucida (*cVG1* expression is an early target of  
250 *VG1/NODAL* signalling; (Skromne and Stern, 2002, Torlopp et al., 2014)) was  
251 found in the vicinity of the bead (Fig. 4 E and F).

## 252 **b. Increasing the amount of inhibitor**

253 A more counterintuitive prediction arises when the strength of inhibition by BMP is  
254 increased in a region that normally expresses high levels of BMP (Fig. 5 A). The  
255 two models predict different outcomes: Model A predicts that increasing BMP  
256 signalling in the anterior marginal zone will reduce the chance of ectopic streak  
257 formation (Fig. 5 B). Counterintuitively however, Model B predicts that introducing  
258 a bead of inhibitor will increase the streak-inducing values in an area adjacent to  
259 the bead (bottom, Fig. 5 B). However Model B also suggests that this effect will be  
260 small, perhaps insufficient to result in formation of a mature ectopic primitive  
261 streak.

262 In embryological experiments in which a BMP4 bead was grafted into the anterior  
263 marginal zone, no *cBRA* expression or streak formation was observed after  
264 overnight incubation (Fig. 5 C). After short incubation (4.5 h), however, *cVG1*  
265 expression was observed in cells surrounding the grafted BMP4 bead in the  
266 anterior marginal zone and slightly in the adjacent area pellucida (Fig. 5 D). *cVG1*-  
267 expression was absent from cells directly overlying the bead (Fig. 5 F) (see also  
268 (Arias et al., 2017)). In addition, the ectopic expression was very weak, only  
269 detectable after prolonged chromogenic development of the in situ hybridisation  
270 (Fig. 5 D and F). This ectopic expression of *cVG1* in the anterior marginal zone  
271 was transient: it was seen at 4.5 h and disappeared by 6 h, remaining mostly in  
272 the lower layer of the area opaca (germ wall; Fig. 5 E and G). In conclusion, this  
273 experimental result conforms with the predictions of Model B but not those of  
274 Model A.

## 275 **c. Effect of adjacent sub-threshold amounts of inducer and inhibitor**

276 We have seen that an increase in streak-inhibiting signal can result in paradoxical  
277 induction of *cVG1*, which is only predicted by Model B. However, no ectopic *cBRA*  
278 expression is observed. If it is indeed the case that cells assess their position in  
279 comparison with their neighbours (Model B), rather than measuring the absolute  
280 local levels of inducer and inhibitor, then introducing a sub-threshold amount of  
281 inducer flanked by low amounts of inhibitor would both deepen and steepen the  
282 gradient and might therefore be expected, perhaps paradoxically, to generate a  
283 new streak. Model A, in contrast, might predict that neither concentration is high  
284 enough locally to affect cell fates resulting in a failure of ectopic streak formation.  
285 To simulate this, we explored parameter values for both models that could  
286 generate this result (Fig. 6). We find that only Model B can predict the initiation of  
287 an ectopic streak (Fig. 6 D-F). No parameters were found that allowed Model A to  
288 produce the same result (Fig. 6 D-F).

289 Next, we tested this prediction experimentally. We began by establishing the  
290 minimum threshold of ACTIVIN concentration for PS induction; 2.5 ng/ $\mu$ l of  
291 ACTIVIN does not induce *cBRA* (Fig. S2 D). When two BMP4-beads (6.25 ng/ $\mu$ l)  
292 were separated by a control bead, no ectopic PS formed (0/9) (Fig. 6 A and G).  
293 When an ACTIVIN-bead (2.5 ng/ $\mu$ l) was flanked by control beads, 97% of  
294 embryos showed no ectopic primitive streak ( $n=37$ ) (Fig. 6 B and H). We then  
295 tested the predictions of the model experimentally: when a sub-threshold ACTIVIN  
296 bead was flanked by BMP4 beads, *cBRA* expression was seen in 12.5% of cases  
297 ( $n=56$ ) (Fig. 6 C and I). However, a higher concentration of BMP4 (12.5 ng/ $\mu$ l) in  
298 the neighbouring beads reduced the proportion of embryos with an ectopic streak  
299 (to 9%;  $n=22$ ) (data not shown), suggesting that at this concentration the total  
300 amount of inhibitor may overcome the small amount of inducer emitted by the  
301 sub-threshold ACTIVIN-bead. In conclusion, therefore, only Model B correctly  
302 predicts the counterintuitive results of this experiment.

303 Taken together (Fig. 7) our results strongly favour a model by which cells assess  
304 their status (in terms of whether or not they will constitute a primitive-streak-  
305 initiating centre) in relation to the relative amounts of inducing and inhibiting  
306 signals they experience and also in relation to the status of their neighbours,  
307 rather than by direct readout of the local concentration of a morphogen that  
308 diffuses freely across the entire embryo.

## 309 Discussion

311 Here, we propose a “neighbourhood watch” model to explain how cells interpret  
312 positional information to determine the site of gastrulation. Our present results,  
313 both from computational modelling and experiments, strongly favour the idea that  
314 cells do not read the concentrations of inducer and inhibitor (“SMAD-value”)  
315 locally and cell autonomously, but rather interpret their own SMAD-value in  
316 relation to that of their neighbours. Moreover, the results suggest that the distance  
317 over which such comparisons take place is greater than just the immediately  
318 neighbouring cell on either side. In our “neighbourhood watch” model, a  
319 neighbourhood size of 100-130 cells is predicted to satisfy experimental  
320 observations, based upon the parameter values estimated by the Bayesian  
321 inference algorithm.

322 In previous studies multiple mechanisms have been uncovered by which cells  
323 interpret morphogen gradients. Can these other mechanisms explain our results?  
324 A key check when answering this question is to ask whether an alternative  
325 mechanism can explain the lack of ectopic streak and *cBRA* expression when an  
326 inducing signal is applied ectopically as a broad domain (Fig. 2). The first possible  
327 mechanism is that cells respond directly to morphogen concentration in a graded  
328 manner, as studied in explants of *Xenopus* embryos with a bead graft (Gurdon et  
329 al., 1995). Another study using cultured blastula cells not only supports this but  
330 also suggests that interaction with neighbouring cells is not required for the  
331 interpretation of morphogen concentration (Gurdon et al., 1999). However, this  
332 mechanism cannot explain our result of why a broad domain of inducer  
333 paradoxically reduces ectopic *cBRA* expression. A second possible mechanism of  
334 morphogen interpretation is one in which cells transform the signal concentration  
335 into the intracellular activity of a transcription factor, generating dynamic gene



336 expression patterns with regulatory networks as shown for neural tube patterning  
337 (Cohen et al., 2013). Although this mechanism explains well the precision of  
338 different thresholds for interpreting morphogen concentrations based on duration  
339 and level (strength) of signals, it cannot explain our experimental observations,  
340 especially because we find that a broad domain exposed to inducing signal,  
341 without changing the duration of signals, reduced the incidence of ectopic *cBRA*  
342 expression. These considerations make it more likely that interactions between  
343 neighbouring cells are needed to position the primitive streak. A recent paper  
344 proposes that a neighbourhood comparison of signal strength (called “spatial fold  
345 change (SFC)” model) is required to position the determination front to regulate  
346 somite size in the zebrafish trunk and tail bud (Simsek and Ozbudak, 2018),  
347 another example of a large developing field undergoing patterning. This suggests  
348 that a mechanism involving neighbourhood comparison for the interpretation of  
349 positional information may be used by different systems, especially if they are of  
350 large size.

351 In the “neighbourhood watch” model in this study as well as in the SFC model  
352 (Simsek and Ozbudak, 2018), cells adopt a relative or normalised value to be  
353 evaluated, rather than the absolute morphogen concentration to assess their  
354 position. A relative value can provide a stable response of cells to signals,  
355 promoting robustness and precision in signal interpretation. Interestingly, a recent  
356 *in vitro* study suggests that cells sense relative signal intensity in the TGF $\beta$ /SMAD  
357 pathway as a fold-change value relative to background to compensate for cellular  
358 noise (Frick et al., 2017).

359 How do cells communicate with their neighbours? In other words, by what  
360 mechanism could cells assess their environment? In the wing imaginal disc of  
361 *Drosophila* embryos, the TGF $\beta$ -related protein Decapentaplegic (Dpp) acts as a  
362 morphogen conveying positional information that results in positioning the wing  
363 veins and other features of the wing. Signal-receiving cells have been shown to  
364 extend thin and long filopodia, called cytonemes, which extend several cell  
365 diameters to the proximity of Dpp-producing cells (Miller et al., 1995, Ramirez-  
366 Weber and Kornberg, 1999, Roy et al., 2011). It is worth noting that the existence  
367 of filopodia extending very large distances (connecting the invaginating  
368 archenteron with the future oral ectoderm at the opposite end of the embryo) was  
369 observed by Gustafson and Wolpert in studies of gastrulation in the sea urchin in  
370 1961 (Gustafson and Wolpert, 1961) – this was one of the studies that initiated  
371 thinking on pattern formation. Similar structures have been observed in chick  
372 embryos during somite development (Sagar et al., 2015) but have not yet been  
373 sought at earlier stages. Another important question is: by what mechanism do  
374 cells sense relative signals compared to their neighbours? In our simulations, we  
375 mimic how each cell encodes the relative strength of inductive (SMAD2/3  
376 activation by Vg1/Nodal/Activin signals) and inhibiting (SMAD1/5/8 activation by  
377 BMP) cues they receive as the ratio between them. This is based on the proposal  
378 (Candia et al., 1997) that these two classes of SMADs (SMAD2/3 versus  
379 SMAD1/5/8) compete for binding to the “co-SMAD”, SMAD4. This could take  
380 place in both models - one possible mechanism to provide information about  
381 the status of neighbouring cells could involve hypothetical intermediate  
382 messengers conveying information about this state. Neighbourhood  
383 information could also be transmitted via a positive-feedback mechanism, for  
384 example a cell sensing higher levels of BMP would be stimulated to produce

385 more BMP protein (Jones et al., 1992, Metz et al., 1998, Re'em-Kalma et al.,  
386 1995, Schulte-Merker et al., 1997).

387 One question is whether the mechanism proposed here (involving only local cell  
388 interactions and no long-range diffusion) is a feature unique to very large fields  
389 (several mm), where meaningful positional information conveyed by diffusion  
390 alone is likely to be impossible (Crick, 1970). There do appear to be several  
391 instances where diffusion of informative morphogens is key, such as initial  
392 patterning of the *Drosophila* blastoderm (Driever and Nusslein-Volhard, 1988a,  
393 Gregor et al., 2007b) and mesoderm induction by activin in *Xenopus* animal caps  
394 (Gurdon et al., 1994, Gurdon et al., 1995, McDowell et al., 1997). However, in the  
395 chick embryo, the anterior-posterior distance between the two extremes of this  
396 ring should span about 300 cell lengths (in reality the marginal zone has a  
397 thickness of about 120  $\mu\text{m}$ , corresponding to about 10 cells – here we represent it  
398 as being one-cell-thick). As argued by Crick, it seems unlikely that this geometry  
399 can support the formation or maintenance of long-range gradients of morphogens  
400 generated by free diffusion (Crick, 1970). It therefore seems likely that positional  
401 information can be imparted by a variety of different mechanisms, perhaps  
402 according to the size and characteristics of the field to be patterned. It will be  
403 interesting to perform experiments comparable to those in this paper in a system  
404 such as anterior-posterior patterning of the chick limb, which is also large at early  
405 stages (HH18-20) and involves a localised signalling region (the Zone of  
406 Polarizing Activity) (Riddle et al., 1993, Tickle et al., 1975).

407 Here we propose that positional information (when interpreted by a collection of  
408 cells) defines the location of the signalling centre (NODAL-expressing) that  
409 initiates primitive streak formation (Bertocchini and Stern, 2002). Initiation of a  
410 streak can be seen as the event that defines embryonic polarity. Our experiments  
411 and the associated models were designed to ask questions about how cells within  
412 the marginal zone assess their positions around the circumference of this  
413 signalling region, and thereafter determine the site next to which (in the area  
414 pellucida) the primitive streak will start to form. However, it is important to realise  
415 that in the embryo, the downstream consequence of these processes is not only a  
416 spot of *cBRA* expression, but rather a true “streak”, gradually extending towards  
417 the centre of the embryo. It has been shown previously that this elongation  
418 involves a process of cell polarisation and intercalation affecting the same site in  
419 the area pellucida where cells receive the inducing signals from the marginal zone  
420 (and which itself expresses *cVG1* and NODAL) (Rozbicki et al., 2015, Voiculescu  
421 et al., 2007, Voiculescu et al., 2014). Here, we observe cases where *cBRA* is  
422 induced but this is not followed by formation of an elongated primitive streak. For  
423 example, this result is seen when three beads are placed in the anterior marginal  
424 zone (A-B-A). One possible reason for this is that the embryos were not incubated  
425 for long enough to allow the intercalation to take place, but it is also possible that  
426 signals other than *cVG1* and inhibition of BMP are required. Indeed it appears that  
427 non-canonical (planar cell polarity) WNT signalling drives intercalation (Voiculescu  
428 et al., 2007) within the area pellucida. Whatever mechanisms operate in the  
429 normal embryo to determine the site of primitive streak formation must somehow  
430 coordinate these signalling events to generate the full structure.

431 Taken together, we provide evidence that in a large system with two opposing  
432 gradients, cells assess their position in the field by measuring their location based  
433 on the relative concentrations of the inducing (*cVG1*/NODAL) and inhibitory (BMP)

434 signals, and this is refined by taking cues from their local environment to assess  
435 the rate of change of these signals locally. However, the gradients are unlikely to  
436 involve long-range diffusion of two morphogens. Regulation of their strength is  
437 likely to involve other mechanisms resulting in gradients of transcription and  
438 therefore rates of production of the factors.

## 439 **Materials and Methods**

### 440 *Embryo culture and wholemount in situ hybridisation*

441 Fertilised White Leghorn hens' eggs (Henry Stewart, UK) were incubated for 2-4  
442 hours to obtain EGK X-XI embryos, which were then harvested in Pannett-  
443 Compton saline (Pannett and Compton, 1924). After setting up for modified New  
444 culture (New, 1955, Stern and Ireland, 1981), the cell pellets or beads were  
445 grafted as required for each experiment, and the embryos cultured for the desired  
446 length of time before fixation in formaldehyde. Whole mount in situ hybridisation  
447 was conducted as previously described (Stern, 1998, Streit and Stern, 2001). The  
448 probes used were: *cVG1* (Shah et al., 1997), *cBRA* (Kispert et al., 1995) and  
449 *BMP4* (Liem et al., 1995). Stained embryos were imaged under an Olympus  
450 SZH10 stereomicroscope with a QImaging Retiga 2000R camera. Some embryos  
451 were sectioned in sectioning at 10  $\mu\text{m}$ .  
452

### 453 *Misexpression of proteins with transfected cell pellets*

454 HEK293T cells were seeded at  $5 \times 10^5$  cells/well in a 6-well dish and incubated for  
455 two days (or  $1 \times 10^6$  cells/well for transfection on the next day) at  $37^\circ\text{C}$  in a total of  
456 2ml 10% FBS DMEM (growth medium)/well. On the day of transfection, the  
457 growth medium was changed to 1ml/well of 5% FBS DMEM (transfection medium)  
458 at least 30 min before transfection. Transfection was carried out using PEI as  
459 reported previously (Papanayotou et al., 2013). Briefly, 3  $\mu\text{l}$  PEI (1mg/ml) was  
460 added for every 1  $\mu\text{g}$  of DNA transfected, in a total volume of 150 (for 0.5-2 $\mu\text{g}$ )-  
461 200 $\mu\text{l}$  (for 3-6  $\mu\text{g}$ ) DMEM in a sterile Eppendorf. 2 $\mu\text{g}$  DNA were transfected/well  
462 (containing 6 $\mu\text{l}$  PEI/well). Expression plasmids were the previously described  
463 DMVg1 (myc-tagged chimeric Vg1 containing the pro-domain of Dorsalin; (Shah  
464 et al., 1997), pMT23 (murine BMP4; (Dickinson et al., 1990), and pCA $\beta$ -IRES-  
465 GFP (as a control). The latter was also used to estimate transfection efficiency.  
466 Transfection mixtures were vortexed and then left for 10 minutes at room  
467 temperature for the PEI/DNA to complex. The transfection mixture was then  
468 added dropwise to the confluent monolayers of cells and incubated overnight at  
469  $37^\circ\text{C}$ . The next day cells were checked for transfection efficiency of the GFP  
470 plasmid; typically, efficiency ranged from 60-90%. Cells were washed three times  
471 with 1 X PBS, trypsinised and resuspended in a total of 1.5ml growth medium and  
472 put into a sterile Eppendorf. The cell concentration was estimated in a  
473 haemocytometer. A bulk cell suspension of the transfected cells was made in the  
474 growth medium, so that each drop contained 500 cells in a total of 20 $\mu\text{l}$  growth  
475 medium. Hanging drops were formed by placing the 20 $\mu\text{l}$  aliquots on the lid of a  
476 6cm cell culture dish, the bottom of which was filled with 5ml of sterile PBS or  
477 water to create a humidified atmosphere. After placing several such aliquots well-  
478 spaced in a circle, the lid was inverted and placed over the bottom of the dish,  
479 creating a mini culture chamber, to allow the cells to coalesce into pellets without  
480 adhering to the plastic. Culture dishes were incubated for 36-48 h at  $37^\circ\text{C}$  for the  
481 formation of pellets ranging in size from 500-1000 cells and used for grafts as  
482 required.  
483

484  
485  
486  
487  
488  
489  
490  
491  
492  
493  
494  
495  
496  
497  
498  
499  
500  
501  
502  
503  
504  
505  
506  
507  
508  
509  
510  
511  
512  
513  
514  
515  
516  
517  
518  
519  
520  
521  
522  
523  
524  
525  
526  
527  
528  
529  
530  
531  
532  
533

### *Protein or chemical soaked microbeads*

Recombinant human BMP4 (R&D systems, 312-BP) was delivered using Affigel Blue beads (BIO-RAD 1537302); recombinant human ACTIVIN A (R&D systems; 338-AC) was delivered using Heparin-Acrylic beads (Sigma-Aldrich, H5236) and Dorsomorphin hydrochloride (Tocris 3093) was loaded onto AG1X2-formate beads. In each case the beads were incubated overnight at 4 °C in the desired concentration of protein or chemical. Beads were washed in Pannett-Compton saline just before use.

### *Encoding the biological problem mathematically*

The marginal zone is modelled as a one-dimensional ring of cells, comprising 600 cells in total (based on the assumption that the embryo at this stage contains 20,000-50,000 cells (Bertocchini and Stern, 2012) and on electron microscopy data (Lee et al., 2020, Voiculescu et al., 2007) for estimates of cell size and the radius of the marginal zone). Proxies for streak-inducer and -inhibitor concentrations are assigned to each cell  $i$ , represented as  $V_i$  and  $B_i$  respectively with  $i = 1, \dots, 600$  (Fig. 3A).

Before the addition of beads, streak-inducer and -inhibitor levels are inferred from a combination of RNAseq reads (Lee et al., 2020) and *in situ* hybridisation of *cVG1* and *cBMP4* (Fig. S1A) respectively, at approximately stage EG&K XII. To mimic these patterns, we use a gaussian function to model the inducer levels based on the observed strong expression of *cVG1* posteriorly, whereas inhibitor levels are modelled with a parabolic function to reflect the shallow, anterior-to-posterior gradient of *cBMP4* (Fig. S1B). The placement of a bead is modelled as having an additive (or subtractive) effect on local protein concentration. The added values are constant for the width of the bead, and then decrease exponentially in space. Therefore, placement of a bead invokes 4 parameters (Fig. S5 A): the position of the centre of the bead, the width of the bead, the bead's concentration (relating to magnitude of the added values, see Fig. S5 B) and the rate of decay of the added compound in space (i.e. the 'spread' parameter of the exponential distribution, see Fig. S5 C).

### *Defining two models*

For each cell to make its decision to initiate streak formation, we define the relationship between the amounts of SMAD2/3 (as a proxy for amount of inducer received) and SMAD1/5/8 (as a proxy for amount of inhibitor received) within the cells. This is based on the fact that inducing TGF $\beta$ -related signals (VG1/ACTIVIN/NODAL) act by phosphorylation of SMAD2/3, whereas inhibitory TGF $\beta$ -related signals (BMPs) phosphorylate SMAD1/5/8 – cells have been proposed to evaluate the relative strength of signals through competition of binding of these two classes of SMADs to the “co-SMAD”, SMAD4 (Candia et al., 1997). Inducing and inhibitory SMADs compete to form complexes with a fixed, limited amount of SMAD4. The inducer- and inhibitor-linked SMAD complexes then move to the nucleus and regulate expression of different target genes.

With  $V_i$  and  $B_i$  representing the levels of inducer- and inhibitor-linked SMAD complexes in cell  $i$  respectively, we can then represent the total amount of



534 SMAD4 in a cell as the sum of the unbound, inducer-associated and inhibitor-  
535 associated SMAD4 ( $1 + a_V V_i + a_B B_i$ ), where  $a_V$  and  $a_B$  are scalings of the protein  
536 concentrations. We then represent the proportion of streak-inducing SMAD  
537 complex in a cell as

$$F_i = \frac{a_V V_i}{1 + a_V V_i + a_B B_i}. \quad (1)$$

538  $F_i$  will hereafter be referred to as the “SMAD-value”, with higher values indicating  
539 stronger induction.

540 We define two models for how cells interpret the SMAD-value to make the  
541 decision to initiate a primitive streak.

542 A. Each cell compares its SMAD-values with a fixed threshold, without  
543 reference to its neighbours. If the threshold is exceeded, the cell is defined  
544 to take part in primitive streak initiation and will express *cBRA*. For each  
545 cell  $i$ , if

$$F_i > \alpha, \quad (2)$$

547 then that cell forms part of the primitive streak initiating domain.

548 B. Each cell compares its own SMAD-value with those of its neighbours. Each  
549 cell can sense these values a certain distance away from itself and calculates  
550 an average SMAD-value for all the neighbours it can see. If its own value is  
551 sufficiently large compared to the average of its neighbours, the cell becomes  
552 part of a primitive streak initiating centre, and expresses *cBRA*. Therefore, a  
553 streak is initiated next to cell  $i$  if

$$\frac{F_i - F_{\langle \text{nbhd} \rangle}}{F_i} > \beta, \quad (3)$$

554 where  $F_{\langle \text{nbhd} \rangle}$  is defined to be the average value of  $F_j$  in a given neighbourhood  
555 surrounding cell  $i$ . Specifically,

$$F_{\langle \text{nbhd} \rangle} = \frac{\sum_j F_j}{2n}, \quad (4)$$

556 with  $j \in [i - n, i + n] \setminus \{i\}$ , where  $(2n + 1)$  is the full width of the  
557 neighbourhood.  
558

559 Both Models A and B have as parameters a threshold value ( $\alpha$  or  $\beta$ ) and protein  
560 concentration scalings ( $a_V$  and  $a_B$ ). Additionally, Model B requires the size of the  
561 neighbourhood ( $n$ ) to be defined as a parameter.  
562

### 563 *Parameter inference*

564 For the final stage of the modelling process, we ask whether there exists a set of  
565 parameters allowing each model to replicate a target result. As both models  
566 invoke many parameters, resulting in a large and high-dimensional parameter  
567 space, we automate the search with a MCMC Bayesian computation algorithm.  
568 Parameter values are scored using a likelihood function which quantifies how well  
569 model predictions match a target result. The target result is defined based upon  
570 an experimental result (Fig. 3 and Fig. S5) or a new possible theory (Figs. 4-6).  
571

572 For the parameter search, we fix the expected width of the streak initiating  
573 domain, as well as the positions and widths of the beads. We allow the  
574 concentration and spread parameters of the beads to vary (denoted  $c$  and  $s$ ) in  
575 addition to all model parameters ( $\alpha$ ,  $\beta$ ,  $a_V$ ,  $a_B$ ,  $n$ ). Uniform prior distributions are



576 defined for all parameters except the protein concentration scalings,  $a_V$  and  $a_B$ .  
577 For these parameters we define  $b_V = \log_{10} a_V$  and  $b_B = \log_{10} a_B$ , which are then  
578 uniformly distributed. We define biologically plausible ranges within which  
579 parameters are allowed to vary (shown in Fig. S7).

580  
581 In order to obtain the likelihood function, we first define for each cell, the distance  
582 ( $f_i$ ) of the SMAD-value ( $F_i$ ) to the threshold for streak formation, which for Model A  
583 is

$$f_i^{(A)} = F_i - \alpha, \quad (5)$$

584 and for Model B

$$f_i^{(B)} = \frac{F_i - F_{\langle \text{nbhd} \rangle}}{F_i} - \beta. \quad (6)$$

585 So  $f_i > 0$  implies that a streak will form in cell  $i$ , and  $f_i \leq 0$  implies no streak will  
586 form. For convenience we can write that  $f_i = f_i(\theta)$  where  $\theta = \{\alpha, \beta, a_V, a_B, n, c, s\}$ ,  
587 the set of parameters to be varied.

588  
589 The target result is encoded as a binary decision for each cell: presence or  
590 absence of *cBRA* expression indicating the site of primitive streak formation. We  
591 therefore define

$$D_i = \begin{cases} 1, & \text{where streak is hypothesised in cell } i, \\ -1, & \text{where no streak is hypothesised in cell } i. \end{cases} \quad (7)$$

592  
593 Then the ‘likelihood’ of parameters  $\theta$  can be calculated as

$$\mathcal{L}_i(\theta) \sim \frac{1}{2} \left[ 1 + \tanh \left( \frac{D_i f_i(\theta)}{\Delta} \right) \right], \quad (8)$$

594 in cell  $i$ , which approximates a step function as  $\Delta \rightarrow 0$  (Fig. S6). For all parameter  
595 searches, we use  $\Delta = 0.05$ . The likelihood is calculated individually for each cell of  
596 each experimental design given to the algorithm. The product of the likelihoods  
597 (across cells, designs and parameters) is calculated giving the total likelihood for  
598 a given set of parameter values. The parameters used to calculate the total  
599 likelihood include all model parameters and the bead parameters relevant for the  
600 experiment. Only cells in the anterior half of the embryo are used to calculate the  
601 total likelihood, because beads are only grafted anteriorly in the experiments  
602 modelled. As a result of this, Model B does not always predict the presence of an  
603 endogenous streak next to the posterior margin.

604  
605 The posterior distributions of the parameters were obtained via the MCMC  
606 Bayesian computation in the pyDREAM package (Shockley et al., 2017) which  
607 implements a DREAM<sub>(ZS)</sub> algorithm (Laloy and Vrugt, 2012). The algorithm was  
608 run using 5 Markov chains for a minimum of 5000 iterations per chain, and  
609 convergence was tested using the Gelman–Rubin statistic (Gelman and Rubin,  
610 1992, Brooks and Gelman, 1998). The posterior distributions are shown in Figure  
611 S7. An approximate neighbourhood size can be inferred from the posterior  
612 distribution of the parameter  $n$  (defined in equation 4), which peaks between 50-  
613 65 cells for all experiments.

614  
615 The Bayesian computation algorithm maximises the likelihood (equation 8),  
616 quickly and efficiently finding sets of parameter values minimizing the distance  
617 between the target result ( $D_i$ ) and the model result ( $f_i$ ). Specifically, the likelihood

518 function is defined so as to strongly favour sets of parameters where  $D_i$  and  $f_i$   
519 have the same sign (i.e. both above zero or both below zero). Occasionally this  
520 means that parameter values obtained by the algorithm give model values close  
521 to, but not exceeding, the threshold and therefore do not predict ectopic streaks  
522 as required by the target result. Therefore, all parameter values found using the  
523 Bayesian computation algorithm were checked to ensure that ectopic streaks  
524 were predicted in locations dictated by the target result. This was done by  
525 verifying that at least one cell exceeded the threshold to produce an ectopic  
526 streak in the expected location (i.e. the location of a bead). Thus, if parameter  
527 values for a given model allowed the prediction of correct ectopic streak  
528 placement, these values were deemed to give 'success' for a specific  
529 experimental design. The parameter values used in the plots in Figures 3-6 and  
530 S3 were chosen to maximise both the success rate and the likelihood. We have  
531 verified that there is a positive correlation between the success rate and the  
532 likelihood score (Fig. S4). All parameter values are given in Data S1.

533  
534 The parameter search is performed for each group of experimental designs  
535 comprising Figures 1, 2, 4/5 and 6. Ideally, the parameter search must output a  
536 single set of bead parameters, allowing both models to approximate the target  
537 results as closely as possible (Fig. 3 H). However, this acts as a restriction that  
538 might limit the ability of either model to replicate the target result. Therefore, the  
539 parameter search was also performed with all parameters varying for both models  
540 independently removing this restriction (Fig. 3 I). We verified that seeking a single  
541 set of bead parameters did not reduce the ability of either model to replicate the  
542 target result (Fig. 3 J).

543  
544 **Author contributions:** HCL conducted all embryo experiments; CH designed the  
545 models and implemented them; NMMO constructed the vectors and performed  
546 cell culture; RPC and KP provided advice and ideas on mathematical methods;  
547 LW provided inspiration and stimulated questions during the early stages of the  
548 study; CDS supervised the study. HCL, CH and CDS wrote the paper.

549  
550 **Competing interests:** The authors declare no competing interests.

551  
552 **Funding:** This research was supported by Basic Science Research Program  
553 through the National Research Foundation of Korea (NRF) funded by the Ministry  
554 of Education (2014R1A6A3A03053468) to HCL, by an MRC DTP studentship  
555 (MR/N013867/1) to CH and by a Wellcome Trust Investigator Award  
556 (107055/Z/15/Z) to CDS.

557  
558 **Data and materials availability:** The software used for the mathematical and  
559 computational modelling is available at  
560 <https://github.com/catoaste/neighbourhood-streak>.

## 561 **References.**

- 562  
563 ARIAS, C. F., HERRERO, M. A., STERN, C. D. & BERTOCCHINI, F. 2017. A molecular  
564 mechanism of symmetry breaking in the early chick embryo. *Sci Rep*, 7, 15776.  
565 BERTOCCHINI, F., SKROMNE, I., WOLPERT, L. & STERN, C. D. 2004. Determination  
566 of embryonic polarity in a regulative system: evidence for endogenous inhibitors

- 567 acting sequentially during primitive streak formation in the chick embryo.  
568 *Development*, 131, 3381-90.
- 569 BERTOCCHINI, F. & STERN, C. D. 2002. The hypoblast of the chick embryo positions  
570 the primitive streak by antagonizing nodal signaling. *Dev Cell*, 3, 735-44.
- 571 BERTOCCHINI, F. & STERN, C. D. 2012. Gata2 provides an early anterior bias and  
572 uncovers a global positioning system for polarity in the amniote embryo.  
573 *Development*, 139, 4232-8.
- 574 BODE, H. 2011. Axis formation in hydra. *Annu Rev Genet*, 45, 105-17.
- 575 BROOKS, S. P. & GELMAN, A. 1998. General Methods for Monitoring Convergence of  
576 Iterative Simulations. *Journal of Computational and Graphical Statistics*, 7, 434-  
577 455.
- 578 CANDIA, A. F., WATABE, T., HAWLEY, S. H., ONICHTCHOUK, D., ZHANG, Y.,  
579 DERYNCK, R., NIEHRS, C. & CHO, K. W. 1997. Cellular interpretation of multiple  
580 TGF-beta signals: intracellular antagonism between activin/BVg1 and BMP-2/4  
581 signaling mediated by Smads. *Development*, 124, 4467-80.
- 582 COHEN, M., BRISCOE, J. & BLASSBERG, R. 2013. Morphogen interpretation: the  
583 transcriptional logic of neural tube patterning. *Curr Opin Genet Dev*, 23, 423-8.
- 584 CRICK, F. 1970. Diffusion in embryogenesis. *Nature*, 225, 420-2.
- 585 DESSAUD, E., RIBES, V., BALASKAS, N., YANG, L. L., PIERANI, A., KICHEVA, A.,  
586 NOVITCH, B. G., BRISCOE, J. & SASAI, N. 2010. Dynamic assignment and  
587 maintenance of positional identity in the ventral neural tube by the morphogen  
588 sonic hedgehog. *PLoS Biol*, 8, e1000382.
- 589 DICKINSON, M. E., KOBRIN, M. S., SILAN, C. M., KINGSLEY, D. M., JUSTICE, M. J.,  
590 MILLER, D. A., CECI, J. D., LOCK, L. F., LEE, A., BUCHBERG, A. M. & ET AL.  
591 1990. Chromosomal localization of seven members of the murine TGF-beta  
592 superfamily suggests close linkage to several morphogenetic mutant loci.  
593 *Genomics*, 6, 505-20.
- 594 DRIEVER, W. & NUSSLEIN-VOLHARD, C. 1988a. The bicoid protein determines  
595 position in the Drosophila embryo in a concentration-dependent manner. *Cell*, 54,  
596 95-104.
- 597 DRIEVER, W. & NUSSLEIN-VOLHARD, C. 1988b. A gradient of bicoid protein in  
598 Drosophila embryos. *Cell*, 54, 83-93.
- 599 FRICK, C. L., YARKA, C., NUNNS, H. & GOENTORO, L. 2017. Sensing relative signal  
700 in the Tgf-beta/Smad pathway. *Proc Natl Acad Sci U S A*, 114, E2975-E2982.
- 701 GELMAN, A. & RUBIN, D. B. 1992. Inference from Iterative Simulation Using Multiple  
702 Sequences. *Statistical Science*, 7, 457-472.
- 703 GREEN, J. B. & SMITH, J. C. 1990. Graded changes in dose of a Xenopus activin A  
704 homologue elicit stepwise transitions in embryonic cell fate. *Nature*, 347, 391-4.
- 705 GREGOR, T., TANK, D. W., WIESCHAUS, E. F. & BIALEK, W. 2007a. Probing the limits  
706 to positional information. *Cell*, 130, 153-64.
- 707 GREGOR, T., WIESCHAUS, E. F., MCGREGOR, A. P., BIALEK, W. & TANK, D. W.  
708 2007b. Stability and nuclear dynamics of the bicoid morphogen gradient. *Cell*,  
709 130, 141-52.
- 710 GURDON, J. B., HARGER, P., MITCHELL, A. & LEMAIRE, P. 1994. Activin signalling  
711 and response to a morphogen gradient. *Nature*, 371, 487-92.
- 712 GURDON, J. B., MITCHELL, A. & MAHONY, D. 1995. Direct and continuous  
713 assessment by cells of their position in a morphogen gradient. *Nature*, 376, 520-1.
- 714 GURDON, J. B., STANDLEY, H., DYSON, S., BUTLER, K., LANGON, T., RYAN, K.,  
715 STENNARD, F., SHIMIZU, K. & ZORN, A. 1999. Single cells can sense their  
716 position in a morphogen gradient. *Development*, 126, 5309-17.

- 717 GUSTAFSON, T. & WOLPERT, L. 1961. Studies on the cellular basis of morphogenesis  
718 in the sea urchin embryo. Gastrulation in vegetalized larvae. *Exp Cell Res*, 22,  
719 437-49.
- 720 JONES, C. M., LYONS, K. M., LAPAN, P. M., WRIGHT, C. V. & HOGAN, B. L. 1992.  
721 DVR-4 (bone morphogenetic protein-4) as a posterior-ventralizing factor in  
722 *Xenopus* mesoderm induction. *Development*, 115, 639-47.
- 723 KISPERT, A., ORTNER, H., COOKE, J. & HERRMANN, B. G. 1995. The chick  
724 Brachyury gene: developmental expression pattern and response to axial  
725 induction by localized activin. *Dev Biol*, 168, 406-15.
- 726 KUMAR, A., GATES, P. B. & BROCKES, J. P. 2007. Positional identity of adult stem  
727 cells in salamander limb regeneration. *C R Biol*, 330, 485-90.
- 728 LALOY, E. & VRUGT, J. A. 2012. High-dimensional posterior exploration of hydrologic  
729 models using multiple-try DREAM(ZS) and high-performance computing. *Water*  
730 *Resources Research*, 48.
- 731 LECUIT, T., BROOK, W. J., NG, M., CALLEJA, M., SUN, H. & COHEN, S. M. 1996. Two  
732 distinct mechanisms for long-range patterning by Decapentaplegic in the  
733 *Drosophila* wing. *Nature*, 381, 387-393.
- 734 LEE, H. C., LU, H. C., TURMAINE, M., OLIVEIRA, N. M. M., YANG, Y., DE ALMEIDA, I.  
735 & STERN, C. D. 2020. Molecular anatomy of the pre-primitive-streak chick  
736 embryo. *Open Biol*, 10, 190299.
- 737 LIEM, K. F., JR., TREMML, G., ROELINK, H. & JESSELL, T. M. 1995. Dorsal  
738 differentiation of neural plate cells induced by BMP-mediated signals from  
739 epidermal ectoderm. *Cell*, 82, 969-79.
- 740 MCDOWELL, N., ZORN, A. M., CREASE, D. J. & GURDON, J. B. 1997. Activin has  
741 direct long-range signalling activity and can form a concentration gradient by  
742 diffusion. *Curr Biol*, 7, 671-81.
- 743 METZ, A., KNOCHEL, S., BUCHLER, P., KOSTER, M. & KNOCHEL, W. 1998.  
744 Structural and functional analysis of the BMP-4 promoter in early embryos of  
745 *Xenopus laevis*. *Mech Dev*, 74, 29-39.
- 746 MILLER, J., FRASER, S. E. & MCCLAY, D. 1995. Dynamics of thin filopodia during sea  
747 urchin gastrulation. *Development*, 121, 2501-11.
- 748 MITRANI, E., ZIV, T., THOMSEN, G., SHIMONI, Y., MELTON, D. A. & BRIL, A. 1990.  
749 Activin can induce the formation of axial structures and is expressed in the  
750 hypoblast of the chick. *Cell*, 63, 495-501.
- 751 NEW, D. A. T. 1955. A new technique for the cultivation of the chick embryo in vitro. *J.*  
752 *Embryol. exp. Morph.*, 3, 326-331.
- 753 PANNETT, C. A. & COMPTON, A. 1924. The cultivation of tissues in saline embryonic  
754 juice. *Lancet*, 1, 381-384.
- 755 PAPANAYOTOU, C., DE ALMEIDA, I., LIAO, P., OLIVEIRA, N. M., LU, S. Q.,  
756 KOUGIOUMTZIDOU, E., ZHU, L., SHAW, A., SHENG, G., STREIT, A., YU, D.,  
757 WAH SOONG, T. & STERN, C. D. 2013. Calfacilitin is a calcium channel  
758 modulator essential for initiation of neural plate development. *Nat Commun*, 4,  
759 1837.
- 760 POSTLETHWAIT, J. H. & SCHNEIDERMAN, H. A. 1971. Pattern formation and  
761 determination in the antenna of the homoeotic mutant Antennapedia of *Drosophila*  
762 melanogaster. *Dev Biol*, 25, 606-40.
- 763 RAMIREZ-WEBER, F. A. & KORNBERG, T. B. 1999. Cytosomes: cellular processes  
764 that project to the principal signaling center in *Drosophila* imaginal discs. *Cell*, 97,  
765 599-607.



- 766 RE'EM-KALMA, Y., LAMB, T. & FRANK, D. 1995. Competition between noggin and  
767 bone morphogenetic protein 4 activities may regulate dorsalization during  
768 *Xenopus* development. *Proc Natl Acad Sci U S A*, 92, 12141-5.
- 769 RIDDLE, R. D., JOHNSON, R. L., LAUFER, E. & TABIN, C. 1993. Sonic hedgehog  
770 mediates the polarizing activity of the ZPA. *Cell*, 75, 1401-16.
- 771 ROY, S., HSIUNG, F. & KORNBERG, T. B. 2011. Specificity of *Drosophila* cytonemes  
772 for distinct signaling pathways. *Science*, 332, 354-8.
- 773 ROZBICKI, E., CHUAI, M., KARJALAINEN, A. I., SONG, F., SANG, H. M., MARTIN, R.,  
774 KNOLKER, H. J., MACDONALD, M. P. & WEIJER, C. J. 2015. Myosin-II-  
775 mediated cell shape changes and cell intercalation contribute to primitive streak  
776 formation. *Nat Cell Biol*, 17, 397-408.
- 777 SAGAR, PROLS, F., WIEGREFFE, C. & SCAAL, M. 2015. Communication between  
778 distant epithelial cells by filopodia-like protrusions during embryonic development.  
779 *Development*, 142, 665-71.
- 780 SCHALLER, H. C. 1973. Isolation and characterization of a low-molecular-weight  
781 substance activating head and bud formation in hydra. *J Embryol Exp Morphol*,  
782 29, 27-38.
- 783 SCHULTE-MERKER, S., LEE, K. J., MCMAHON, A. P. & HAMMERSCHMIDT, M. 1997.  
784 The zebrafish organizer requires chordino. *Nature*, 387, 862-3.
- 785 SHAH, S. B., SKROMNE, I., HUME, C. R., KESSLER, D. S., LEE, K. J., STERN, C. D. &  
786 DODD, J. 1997. Misexpression of chick *Vg1* in the marginal zone induces  
787 primitive streak formation. *Development*, 124, 5127-38.
- 788 SHOCKLEY, E. M., VRUGT, J. A. & LOPEZ, C. F. 2017. PyDREAM: high-dimensional  
789 parameter inference for biological models in python. *Bioinformatics*, 34, 695-697.
- 790 SIMSEK, M. F. & OZBUDAK, E. M. 2018. Spatial Fold Change of FGF Signaling  
791 Encodes Positional Information for Segmental Determination in Zebrafish. *Cell*  
792 *Rep*, 24, 66-78 e8.
- 793 SKROMNE, I. & STERN, C. D. 2002. A hierarchy of gene expression accompanying  
794 induction of the primitive streak by *Vg1* in the chick embryo. *Mech Dev*, 114, 115-  
795 8.
- 796 STERN, C. D. 1998. Detection of multiple gene products simultaneously by in situ  
797 hybridization and immunohistochemistry in whole mounts of avian embryos. *Curr*  
798 *Top Dev Biol*, 36, 223-243.
- 799 STERN, C. D. & IRELAND, G. W. 1981. An integrated experimental study of endoderm  
300 formation in avian embryos. *Anat Embryol*, 163, 245-63.
- 301 STERN, C. D., YU, R. T., KAKIZUKA, A., KINTNER, C. R., MATHEWS, L. S., VALE, W.  
302 W., EVANS, R. M. & UMESONO, K. 1995. Activin and its receptors during  
303 gastrulation and the later phases of mesoderm development in the chick embryo.  
304 *Dev Biol*, 172, 192-205.
- 305 STREIT, A., LEE, K. J., WOO, I., ROBERTS, C., JESSELL, T. M. & STERN, C. D. 1998.  
306 Chordin regulates primitive streak development and the stability of induced neural  
307 cells, but is not sufficient for neural induction in the chick embryo. *Development*,  
308 125, 507-19.
- 309 STREIT, A. & STERN, C. D. 1999. Mesoderm patterning and somite formation during  
310 node regression: differential effects of chordin and noggin. *Mech Dev*, 85, 85-96.
- 311 STREIT, A. & STERN, C. D. 2001. Combined whole-mount in situ hybridization and  
312 immunohistochemistry in avian embryos. *Methods*, 23, 339-44.
- 313 TICKLE, C., SUMMERBELL, D. & WOLPERT, L. 1975. Positional signalling and  
314 specification of digits in chick limb morphogenesis. *Nature*, 254, 199-202.



- 315 TORLOPP, A., KHAN, M. A., OLIVEIRA, N. M., LEKK, I., SOTO-JIMENEZ, L. M.,  
316 SOSINSKY, A. & STERN, C. D. 2014. The transcription factor Pitx2 positions the  
317 embryonic axis and regulates twinning. *Elife*, 3, e03743.
- 318 VOICULESCU, O., BERTOCCHINI, F., WOLPERT, L., KELLER, R. E. & STERN, C. D.  
319 2007. The amniote primitive streak is defined by epithelial cell intercalation before  
320 gastrulation. *Nature*, 449, 1049-52.
- 321 VOICULESCU, O., BODENSTEIN, L., LAU, I. J. & STERN, C. D. 2014. Local cell  
322 interactions and self-amplifying individual cell ingression drive amniote  
323 gastrulation. *Elife*, 3, e01817.
- 324 WOLPERT, L. 1968. The French flag problem: a contribution to the discussion on pattern  
325 development and regeneration. In: WADDINGTON, C. H. (ed.) *Towards a*  
326 *Theoretical Biology*. Aldine Publishing Co.
- 327 WOLPERT, L. 1969. Positional information and the spatial pattern of cellular  
328 differentiation. *Journal of Theoretical Biology*, 25, 1-47.
- 329 YU, P. B., HONG, C. C., SACHIDANANDAN, C., BABITT, J. L., DENG, D. Y., HOYNG,  
330 S. A., LIN, H. Y., BLOCH, K. D. & PETERSON, R. T. 2008. Dorsomorphin inhibits  
331 BMP signals required for embryogenesis and iron metabolism. *Nat Chem Biol*, 4,  
332 33-41.
- 333  
334  
335  
336

## 337 Figure Legends

338  
339 **Fig. 1. Interruption of a domain exposed to an inducing signal increases the**  
340 **incidence of primitive streak induction – experiments with secreting**  
341 **cells. (A, B)** When two pellets of cVG1-expressing cells are grafted in the  
342 anterior marginal zone (aMZ), only a single ectopic primitive streak (red  
343 arrow) is generated. **(C, D)** Control cell pellets do not induce a streak. **(E-**  
344 **G)** Experimental design. Ectopic streak formation is checked in three  
345 different conditions: misexpression of cVG1 in a wide area using four  
346 cVG1-expressing cell pellets **(E)**, introduction of a ‘spacer’ (control cell  
347 pellet) to interrupt a set of four cVg1 pellets **(F)**, and introduction of an  
348 inhibitor (BMP4-expressing cell pellet) to interrupt a set of four cVg1  
349 inducing pellets **(G)**. **(H-J)** representative embryos for each experiment.  
350 The frequency of primitive streak formation is enhanced by interrupting the  
351 domain of inducing signal, even when this interruption is achieved by  
352 introduction of an inhibitor **(J)**. **(K)** Summary graph showing the incidence  
353 of each type of result for the above experiments **(E-J)**. PS: primitive streak.  
354 Black and red arrows, endogenous and ectopic streaks, respectively.  
355 Dotted lines, position of the cell pellets. *cBRA*, primitive streak marker.

356

357 **Fig. 2. Interruption of a domain exposed to an inducing signal increases the**  
358 **incidence of primitive streak induction – experiments with protein-**  
359 **soaked beads. (A-E)** Experimental design. Induction of a streak is  
360 assessed after five combinations of bead grafts: 3 control beads **(A)**, An  
361 ACTIVIN-soaked bead flanked by control beads **(B)**, exposing a wide area  
362 to the inducing signal by grafting 3 ACTIVIN-soaked beads **(C)**, interrupting  
363 the inducing signal by adding a ‘space’ (control bead) to separate two  
364 adjacent inducing (ACTIVIN) beads **(D)**, and adding an inhibitor (BMP4-

soaked bead) to separate two adjacent ACTIVIN beads **(E)**. **(F-J)** Representative embryos for each experiment. Two primitive streaks only form when the inducing signal is interrupted, even when adding an inhibitory signal. **(K)** Summary graph showing the incidence of each type of result for the above experiments. Note that a higher concentration of BMP4 (25 ng/ $\mu$ l), does not allow an ectopic streak to form. Dotted circles, location of beads. Other abbreviations and symbols as in Fig. 1.

**Fig. 3. Mathematical model and verification *in silico*.** **(A-B)** Model workflow. **(A)** The dotted line represents the marginal zone. Concentrations of primitive-streak-inducing and -inhibiting proteins are inferred from experimental design. Target site of streak initiation is encoded for comparison with model predictions. **(B)** In each cell, both models weigh concentrations of streak-inducing and -inhibiting proteins. Model A assumes that cells act autonomously to define the site of streak formation. Model B assumes that cells compare concentrations within a given neighbourhood to initiate streak formation. Model values are plotted for the entire embryo, where values above a threshold define the site of streak initiation. **(C-G)** *In silico* simulations of bead experiments in Figure 2. Top, experimental designs. First row of plots: inducer levels shown as a red line, inhibitor in blue; the lower bar marks the expected position of streak initiation. Second row of plots: Model A values and corresponding predicted streak locations. Third row: Model B values and streak locations. **(C, E-G)** A model is defined as “successful” for one experimental design if the predicted number and location of streaks matches the target result. **(D)** Model A fails to replicate the experimental result. No parameter values are found where Model A is successful for both designs (C) and (D). **(E-G)** Unlike Model A, Model B predicts that exchanging the control bead for a bead of low dose inhibitor will counter-intuitively increase the chances of ectopic streak formation (insets). **(H-J)** To ensure that finding a single set of parameters does not limit the ability of either model to replicate the target results, we used two approaches for parameter estimation: **(H)** a single set of bead parameters is defined for both models, or **(I)** bead and model parameters vary freely for both models, allowing the maximum chance of success. **(J)** approach H does not reduce the success rate of either model. Model B outperforms Model A in all cases.

**Fig. 4. Decreasing the amount of inhibitor induces ectopic primitive streak formation.** Local repression of inhibitor (BMP) using Dorsomorphin induces a streak both *in silico* and *in vivo*. **(A)** Experimental setup. **(B)** Results of *in silico* simulations (colours and other conventions as in Fig. 3). Both models predict ectopic primitive streak formation when the concentration of inhibitor is decreased locally. **(C-F)** Results of *in vivo* experiments. A graft of a 1mM Dorsomorphin-soaked bead in the anterior marginal zone induces formation of an ectopic streak expressing *cBRA* after overnight culture **(C)**, arrow), which is preceded (at 6 h) by ectopic expression of *cVG1* **(E)**, arrow). Control (0.2% DMSO) beads have no effect **(D, F)**. Dotted circles, location of microbeads. The proportion of embryos showing the phenotype illustrated are indicated in the lower right of each panel.

314  
315 **Fig. 5. Increasing the amount of inhibitor augments the streak-inducer.** Local  
316 overexpression of inhibitor (BMP4) increases streak-inducing values *in*  
317 *silico*, and *cVG1* expression *in vivo* in neighbouring cells. **(A)** Experimental  
318 setup. **(B)** Results of *in silico* simulations. Only Model B predicts an  
319 increase in streak-inducing value in cells neighbouring the bead of inhibitor  
320 (arrowheads), but at levels insufficient to initiate an ectopic streak. **(C-G)**  
321 Results of *in vivo* experiments. No ectopic primitive streak (marked by  
322 *cBRA*) is induced overnight after a graft of BMP4 (50 ng/μl) soaked bead  
323 **(C)**. However, a short time (4.5 h) after grafting, ectopic *cVG1* expression is  
324 induced in the marginal zone **(D)** in neighbouring cells **(F)** but not in the  
325 cells lying directly above the bead **(F, square bracket)**. By 6 h after grafting,  
326 induced *cVG1* expression is no longer visible in the marginal zone,  
327 remaining only in the extraembryonic endoderm (germ wall) **(E, arrow and**  
328 **G)**. The dashed lines in **(D and E)** indicate the level of the sections in **(F**  
329 **and G)**. Dotted circles, location of microbeads. The proportion of embryos  
330 showing the illustrated phenotypes is indicated on the lower right of each  
331 panel. Scale bar for **(F and G)**, 100 μm.

332  
333 **Fig. 6. Challenging the models: effect of placing an inhibitor next to sub-**  
334 **threshold amounts of inducer.** **(A-C)** Experimental design. Three  
335 conditions were tested: two BMP4 beads (6.25 ng/μl) **(B)** separated by a  
336 control bead **(C)** **(A)**, a bead loaded with sub-threshold (2.5 ng/μl) amounts  
337 of ACTIVIN **(A)** flanked by two control beads **(C)** **(B)** and a sub-threshold  
338 bead of activin flanked by two beads of inhibitor (BMP4) **(C)**. **(D-F)** Results  
339 of *in silico* simulations. Only Model B predicts that introducing a sub-  
340 threshold amount of inducer flanked by beads of inhibitor will paradoxically  
341 generate a site of ectopic PS formation. **(G-I)** Results of *in vitro*  
342 experiments showing representative embryos for each experiment. Number  
343 of embryos showing the phenotypes are indicated in each panel. *In vivo*,  
344 grafting a sub-threshold ACTIVIN bead flanked by two BMP4 beads in the  
345 marginal zone can induce ectopic *cBRA* expression **(I)**. No such induction  
346 is seen in the other combinations (B-C-B or C-A-C) **(A, B, G, H)**. Black and  
347 red arrows: endogenous and ectopic *cBRA* expression, respectively.  
348 Dotted circles: location of microbeads. The numbers on the lower right of  
349 panels G-I indicate the frequency of the illustrated result for each  
350 experimental combination.

351  
352 **Fig. 7. A “neighbourhood watch” model accounts for positioning the site**  
353 **where primitive streak formation is initiated in the marginal zone of**  
354 **the early chick embryo.** **(A-B)** The “SMAD-value” represents a  
355 combination of inducing and inhibiting signals. Cells assess their position  
356 by comparing their SMAD-value with those of their neighbours. Blue:  
357 territory over which cells are able to sense. Purple: cell(s) initiating primitive  
358 streak formation. Light purple: partial/weak induction. **(A)** The domain of  
359 induction must be sufficiently narrow for cells to sense a local maximum.  
360 When a local maximum is located, primitive streak formation is initiated in  
361 the marginal zone. **(B)** Cells adjacent to a domain of inhibition detect their  
362 relatively high SMAD-value and react by emitting streak-inducing signals  
363 (*cVG1*). However, the induction is not sufficiently strong to initiate the

064 formation of a full streak (no *cBRA* expression). **(C)** Comparison of  
065 predictions by two models: one (“threshold only”) where positional  
066 information is interpreted cell-autonomously solely by assessing the  
067 morphogen concentrations, and another (“neighbourhood watch”) where  
068 cells make local comparisons with their neighbours to assess their position  
069 in the gradients. First row: a narrow domain of induction results in initiation  
070 of primitive streak formation. Second row: broadening the domain of  
071 induction distinguishes between the two models. The “neighbourhood  
072 watch” model predicts that streak formation will not be initiated, matching  
073 experimental data. Third row: a sub-threshold amount of inducer results in  
074 no ectopic *cBRA* expression. Fourth row, the “threshold only” model  
075 predicts that adding inhibitor adjacent to a sub-threshold amount of inducer  
076 will either have no effect or reduce the chance of ectopic streak formation.  
077 In contrast, the “neighbourhood watch” model correctly predicts the  
078 counter-intuitive result that addition of inhibitor increases the chances of  
079 ectopic streak initiation. Green ticks and red crosses represent whether the  
080 model prediction matches the experimental data or not, respectively.  
081 Dashed and dotted lines represent thresholds for interpretation of  
082 morphogen concentration. Purple: primitive streak formation initiated in  
083 cells above threshold.  
084



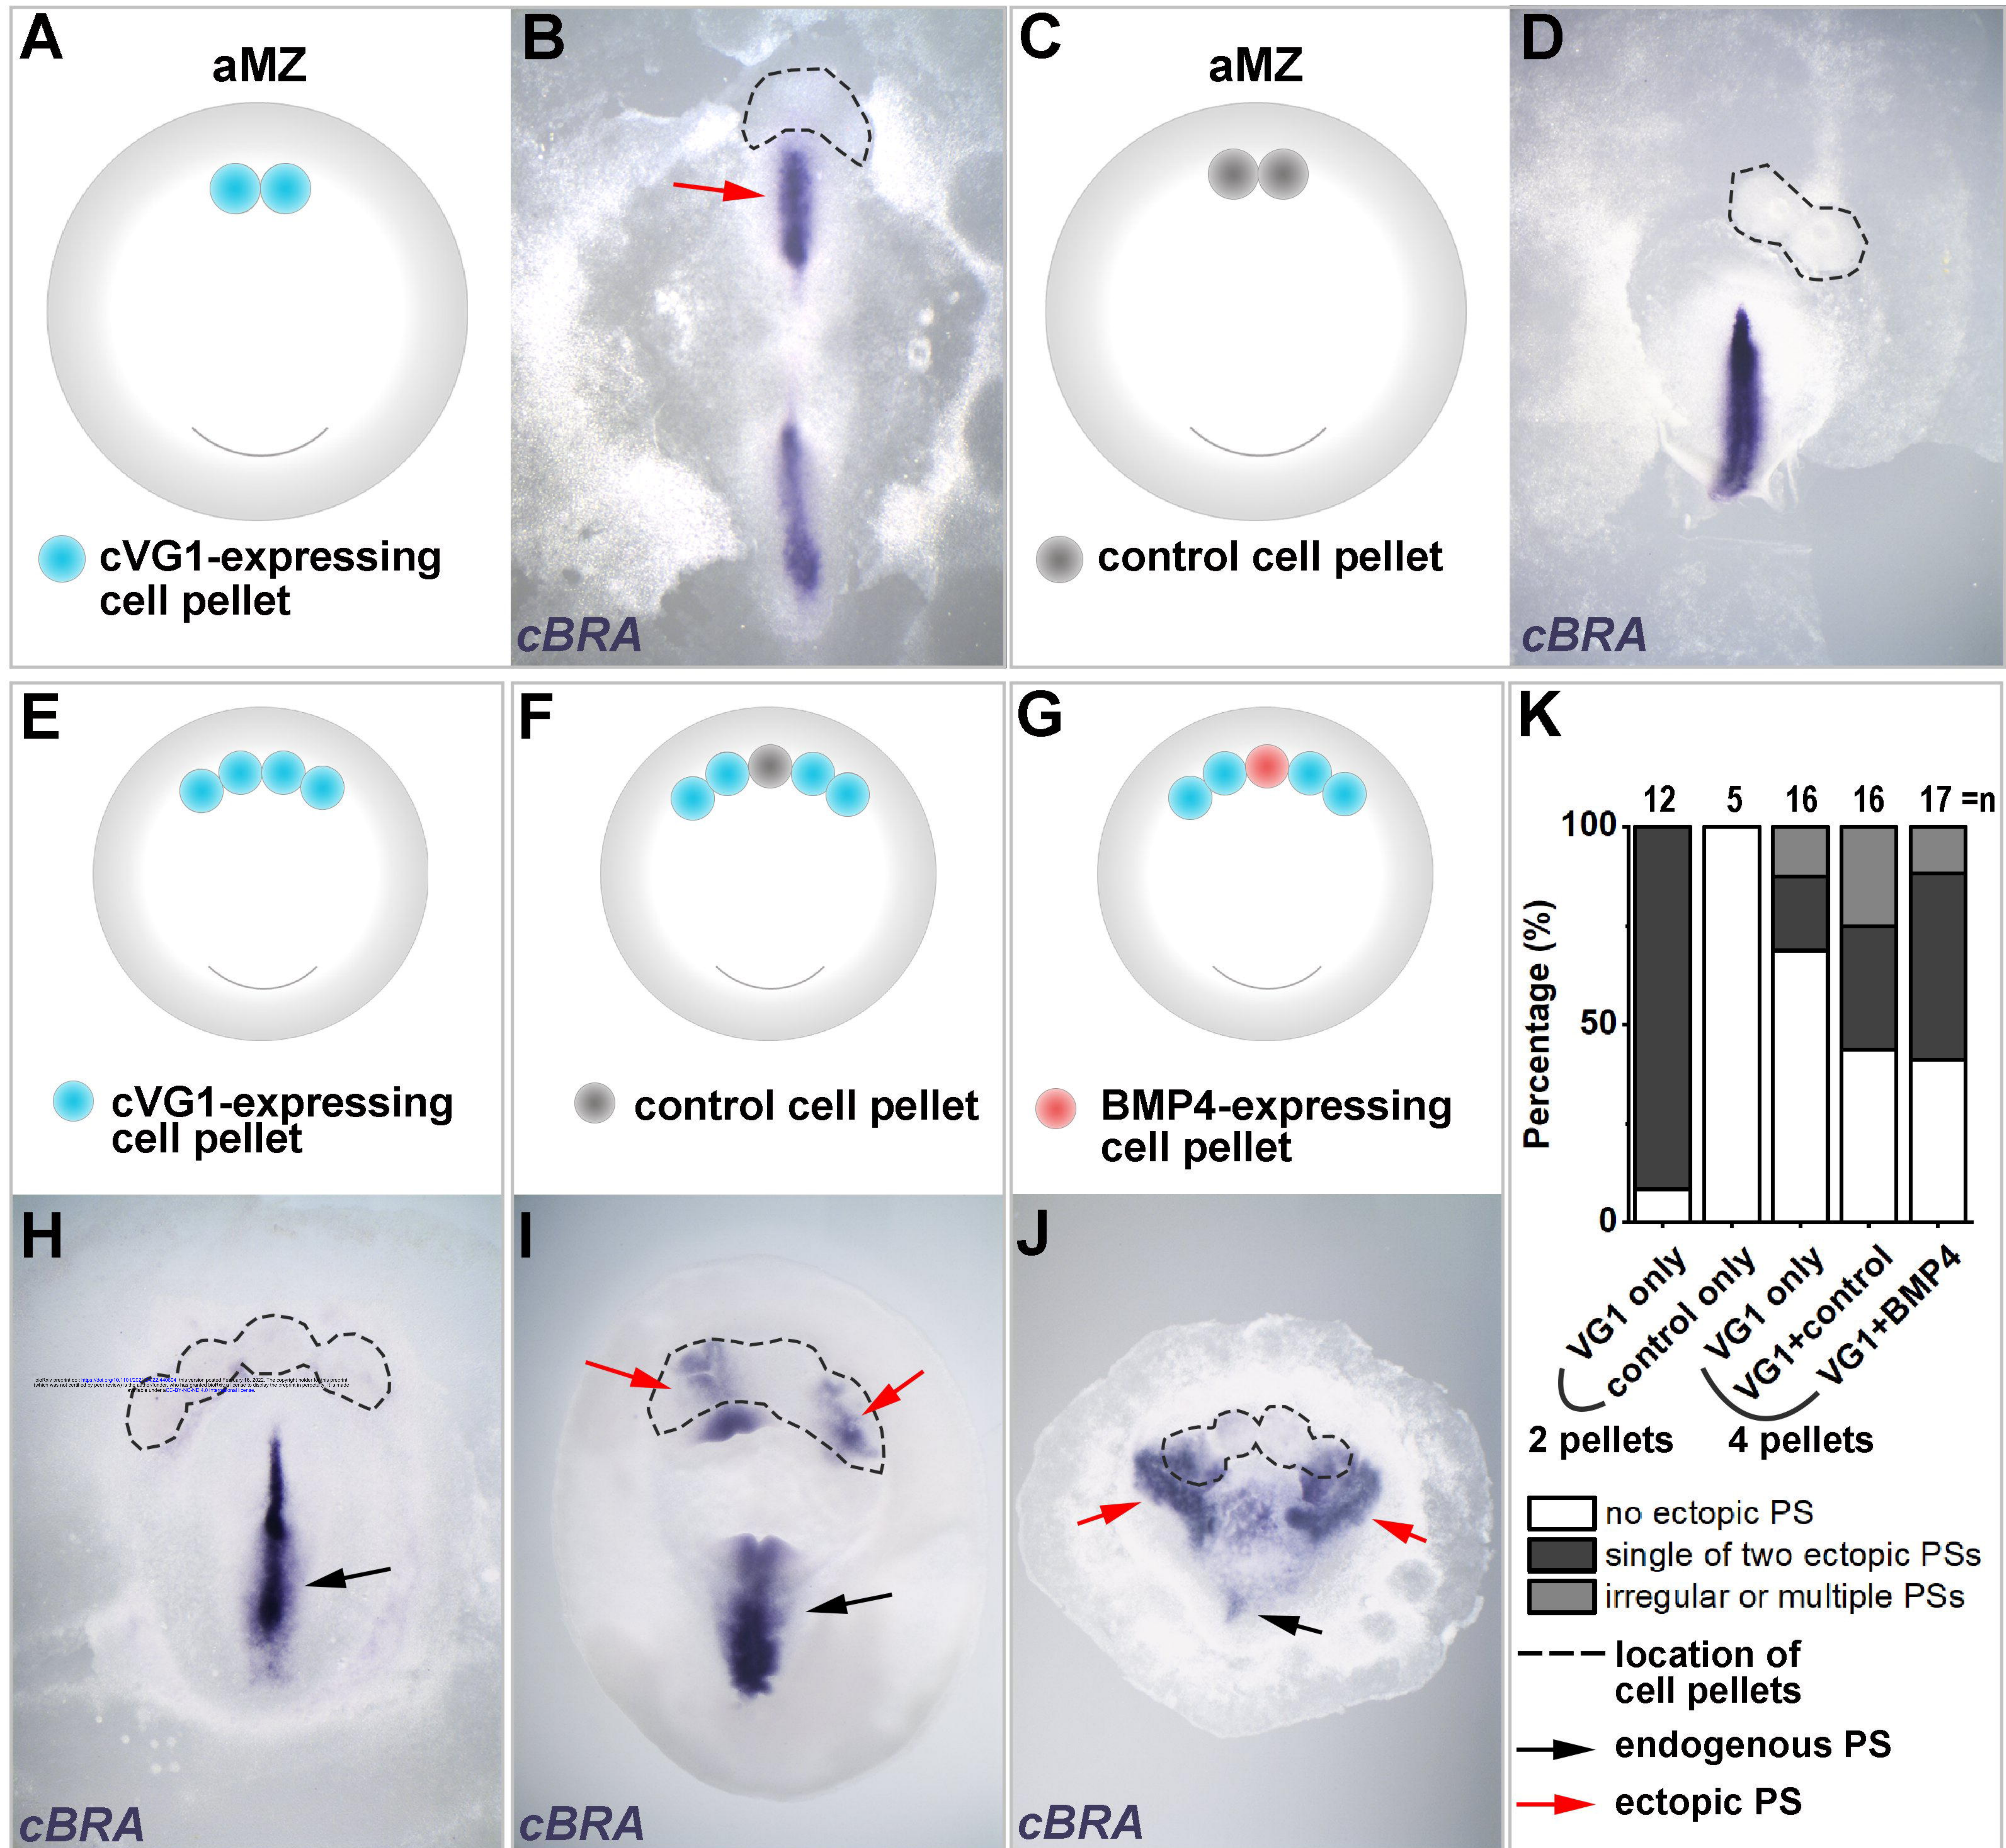



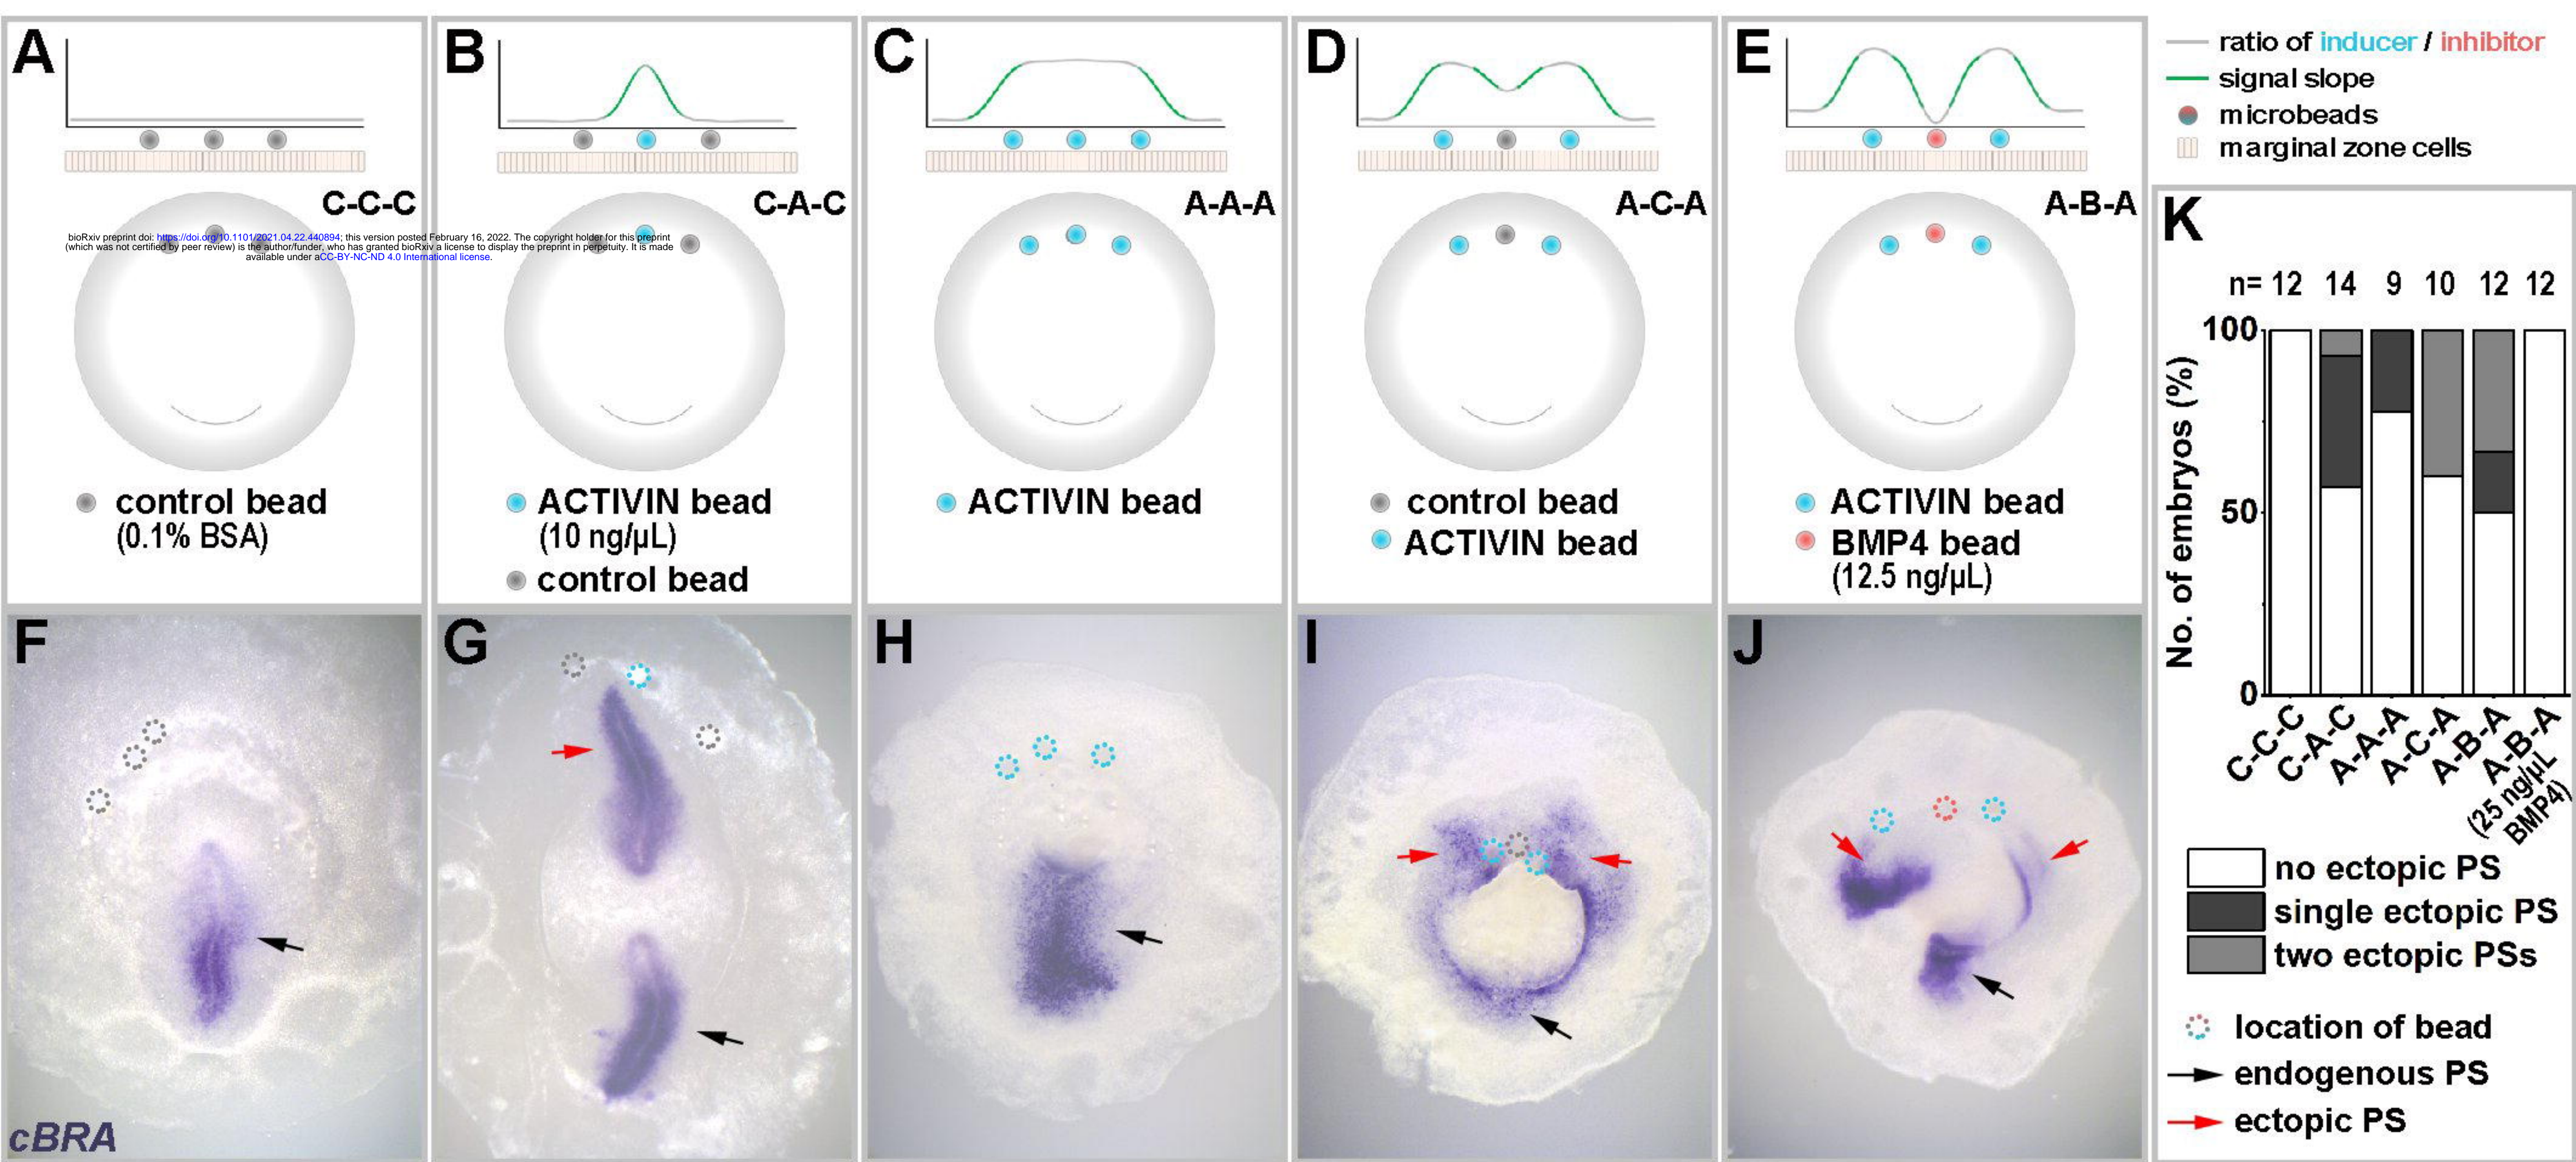



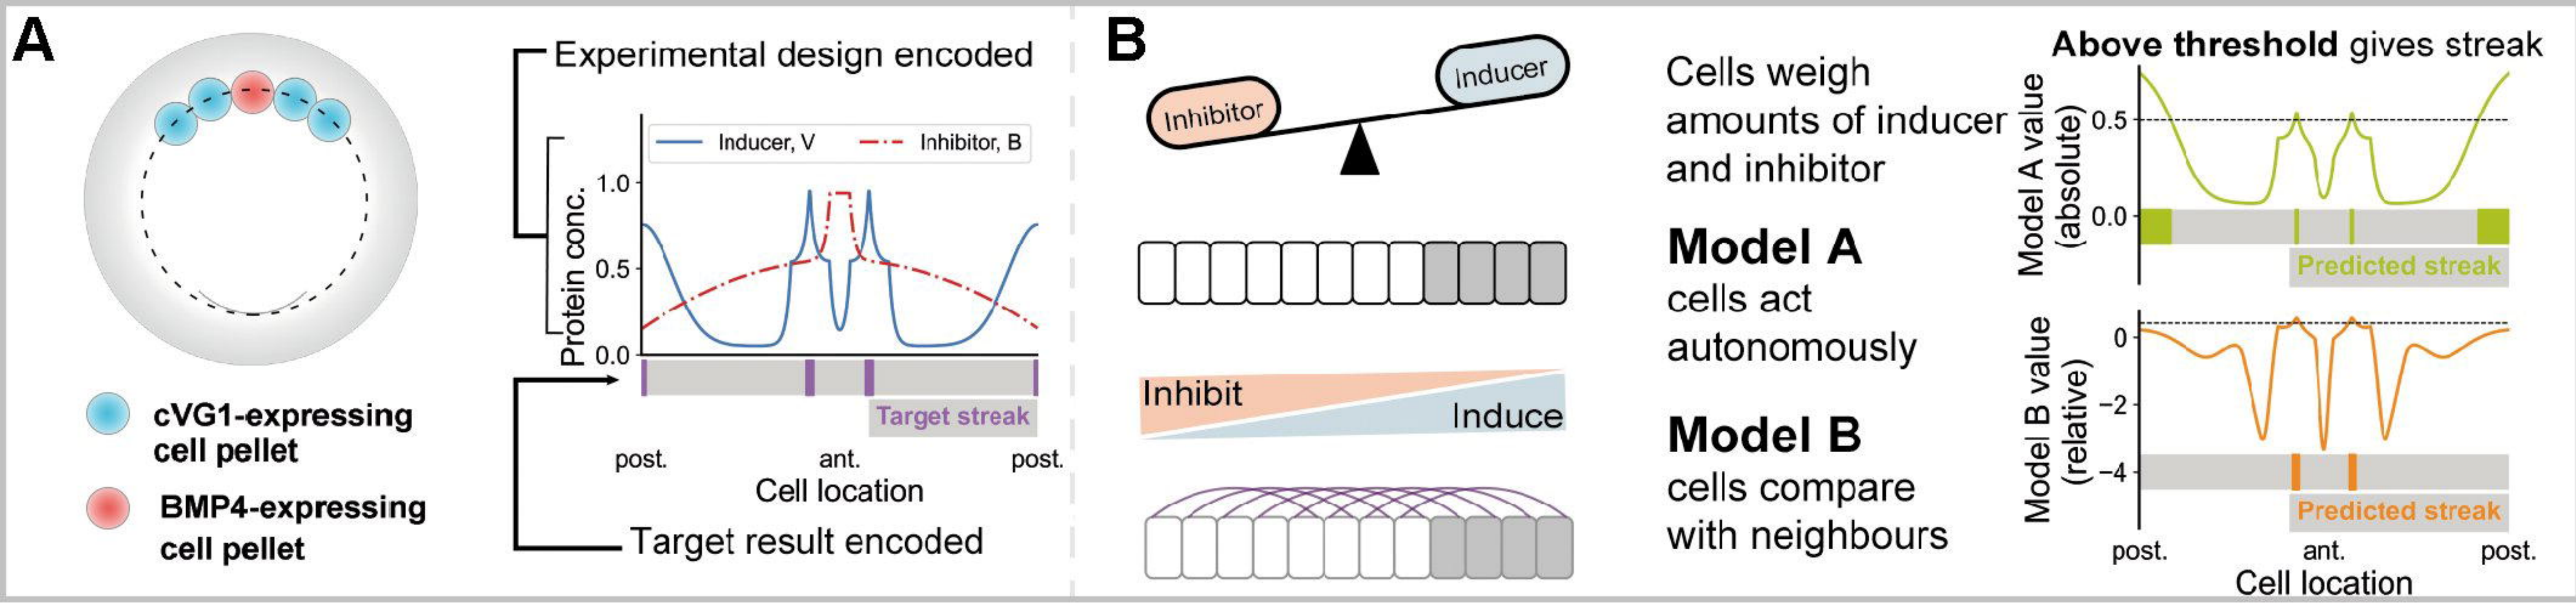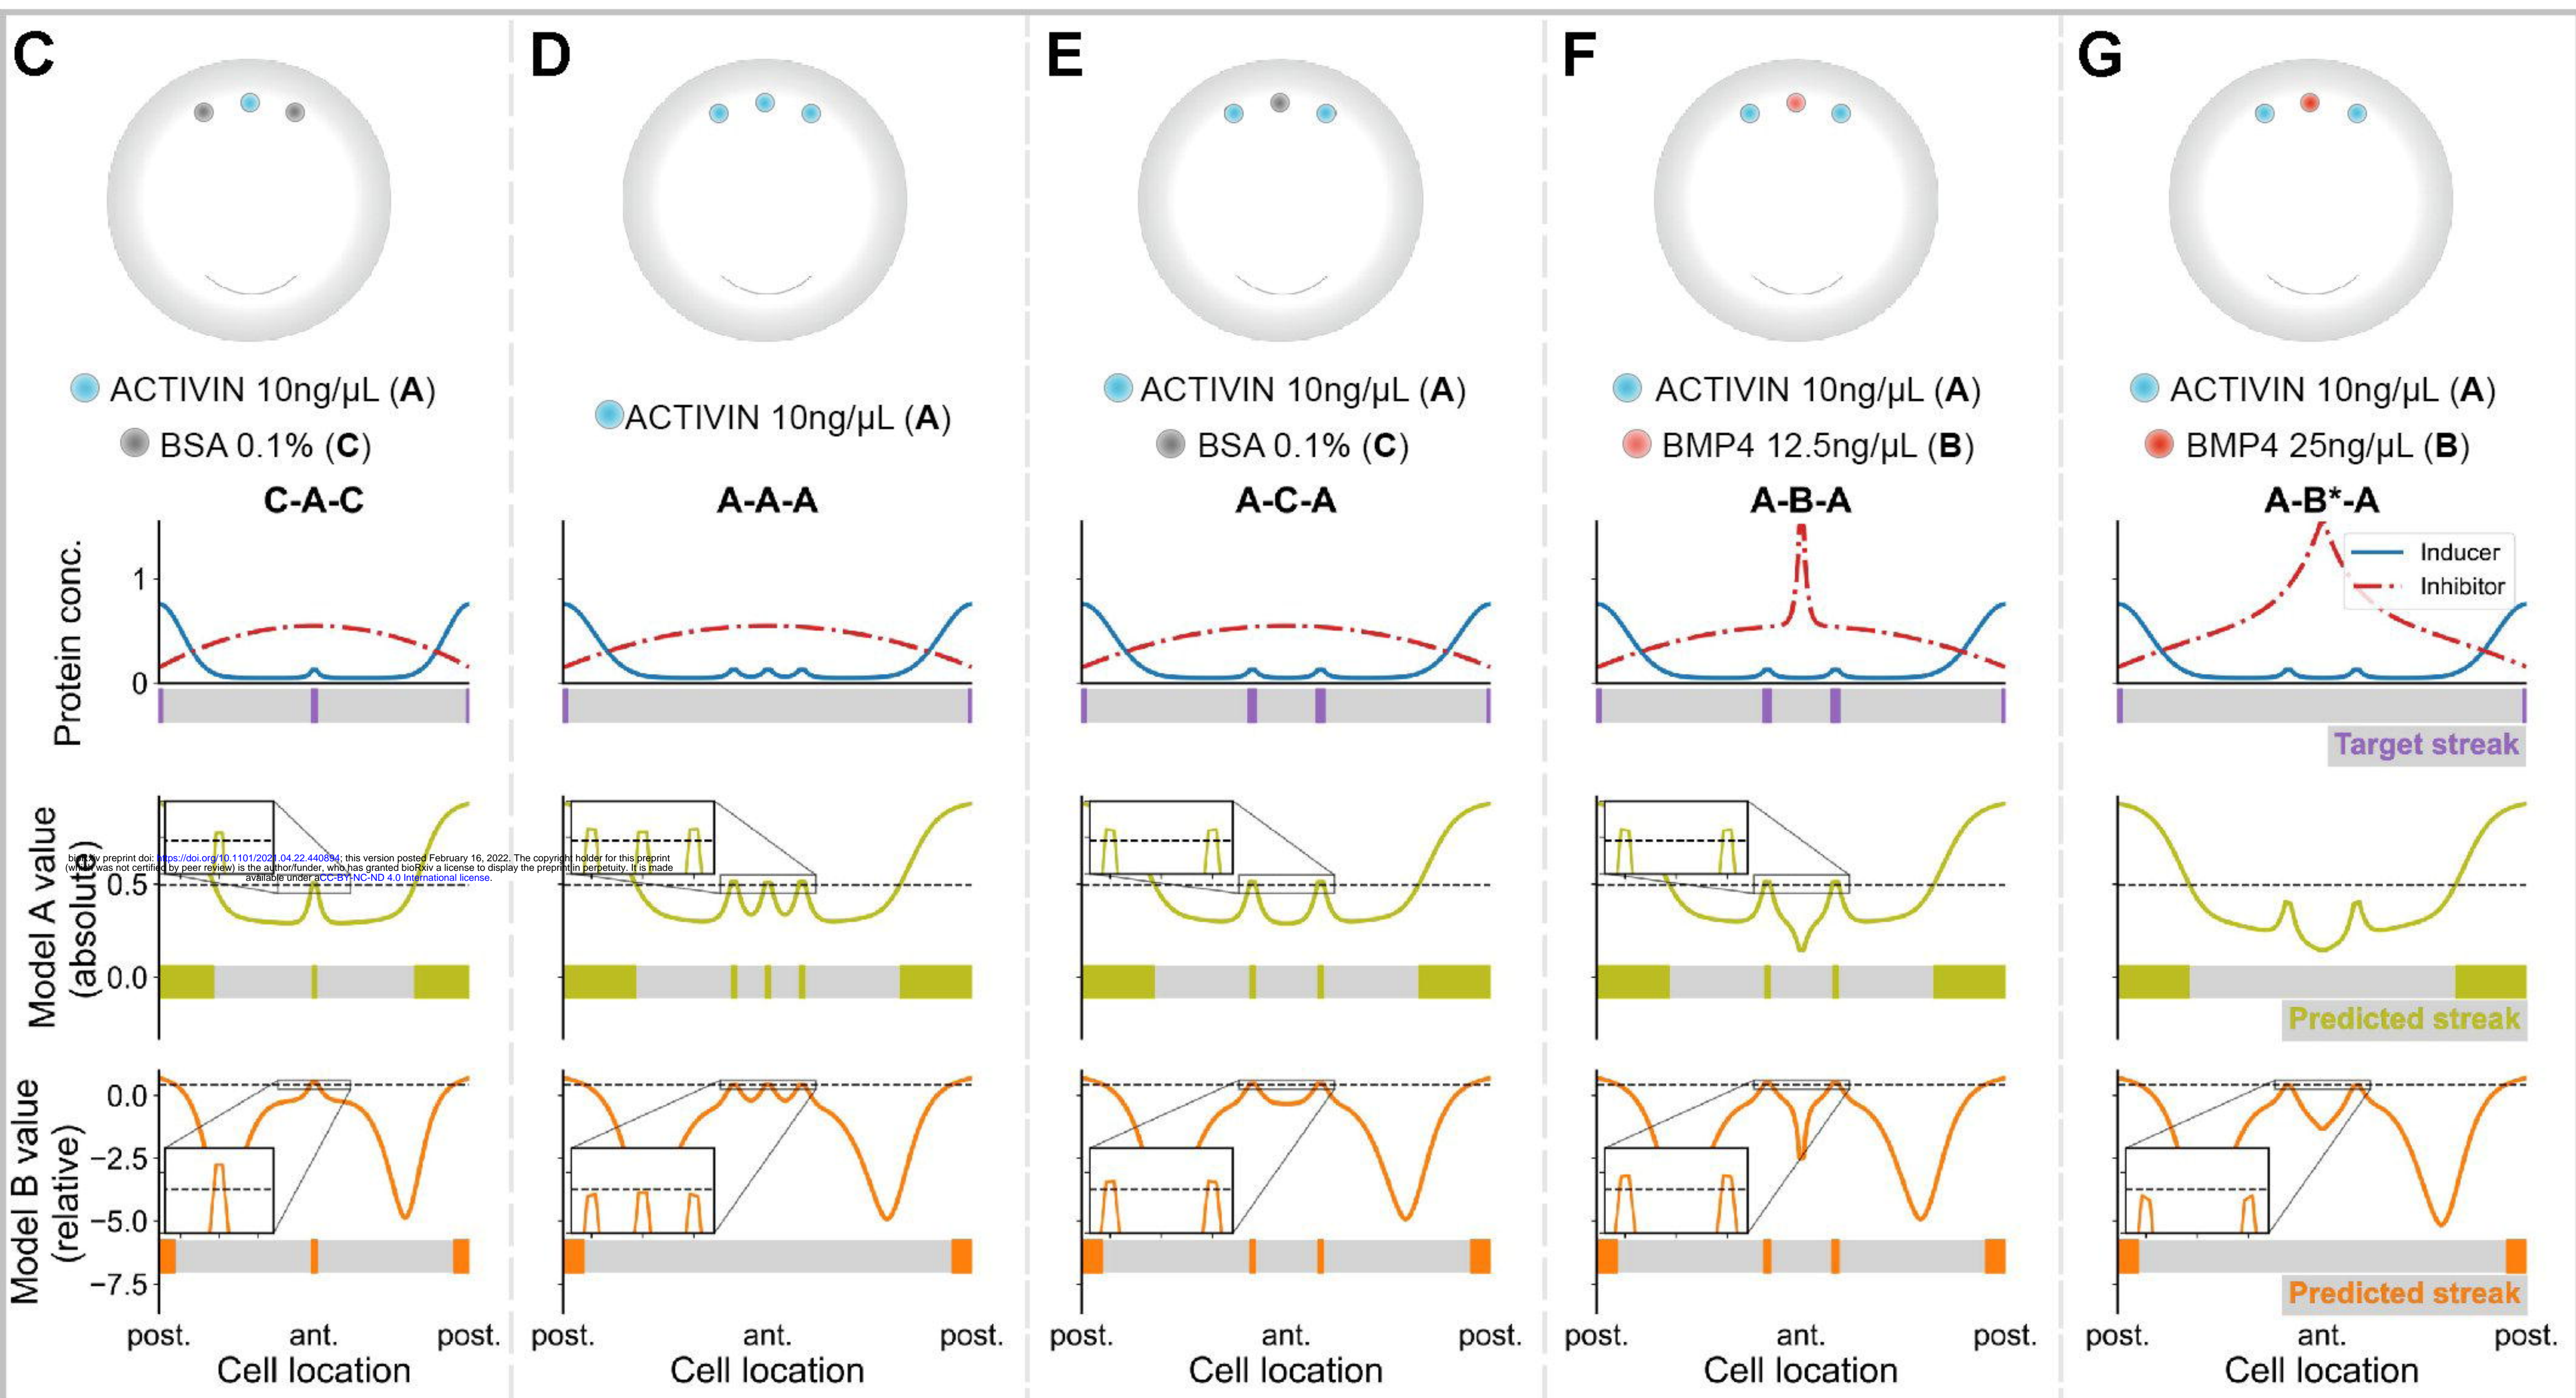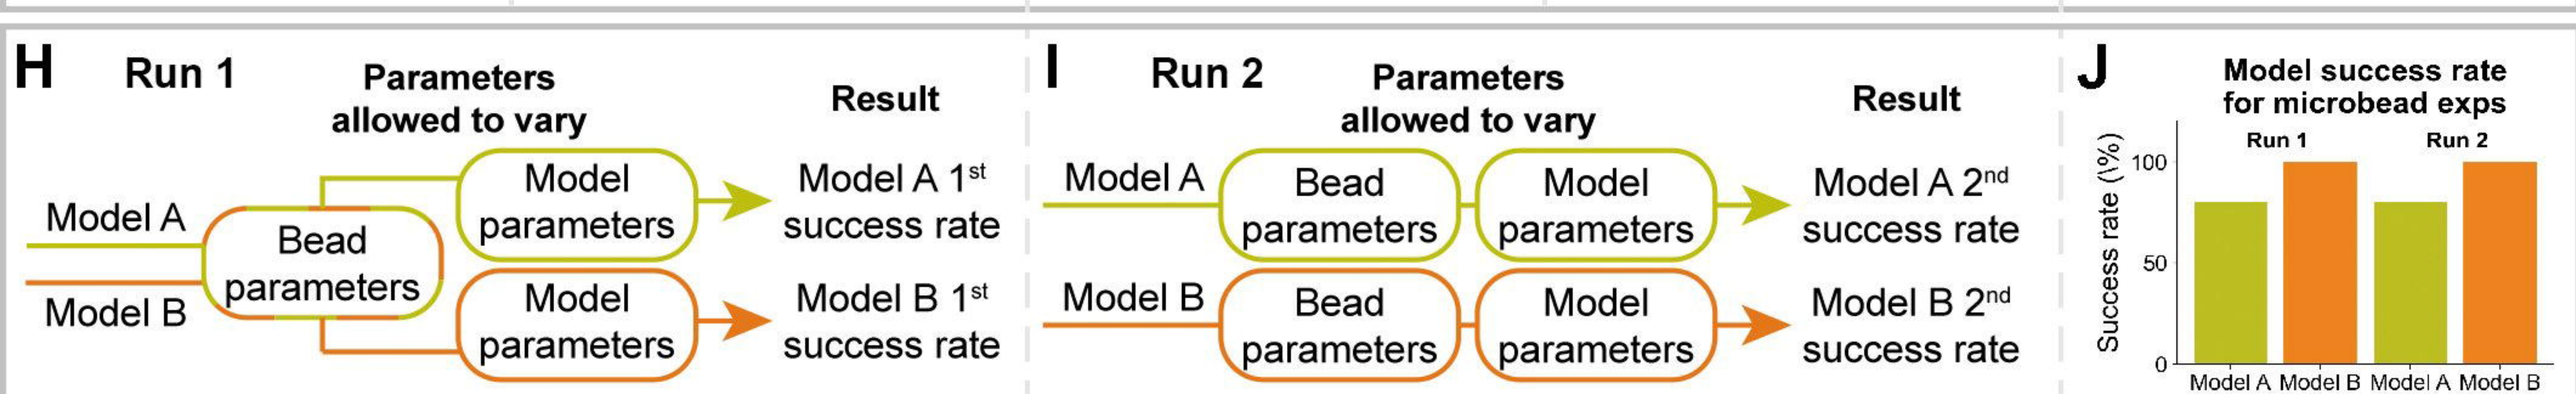



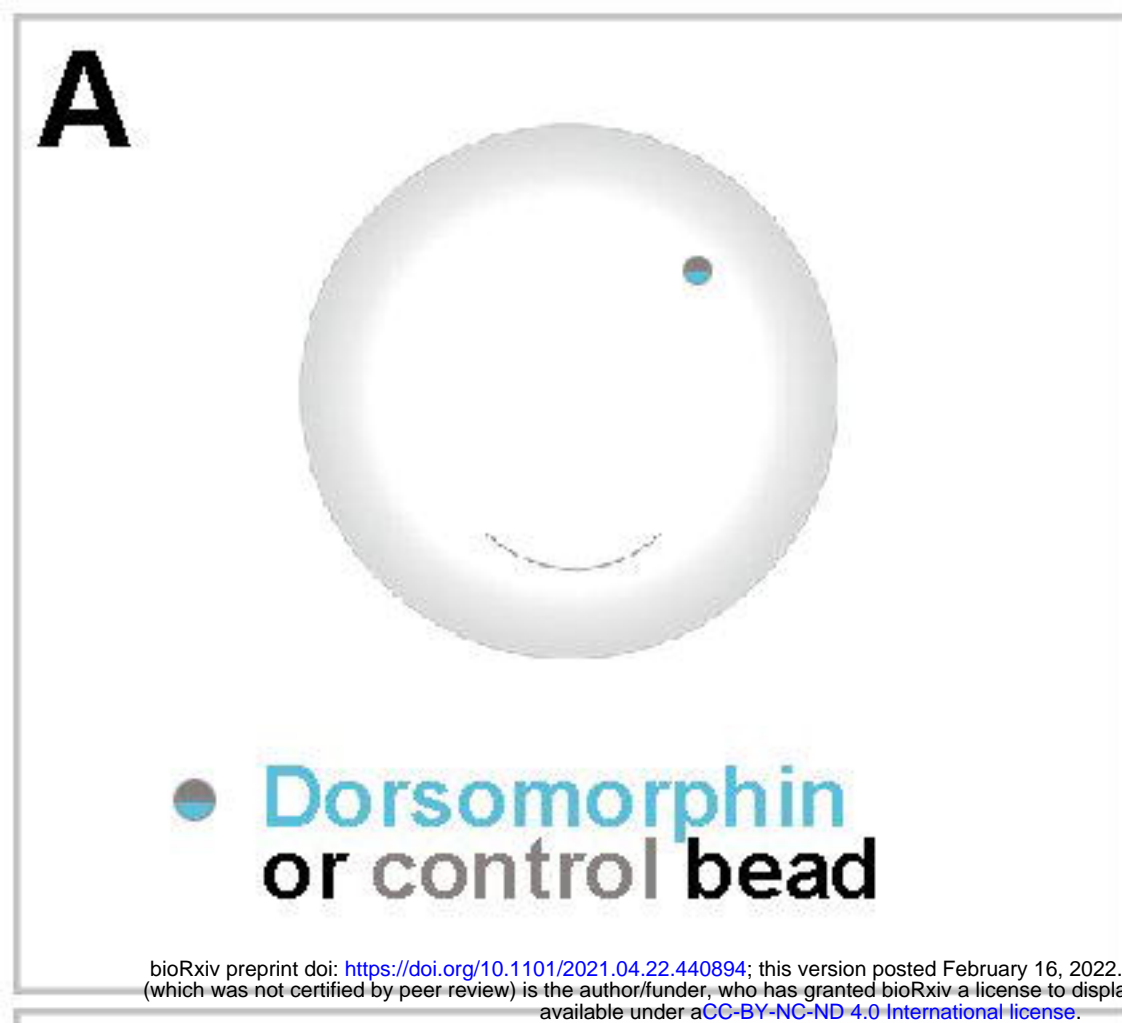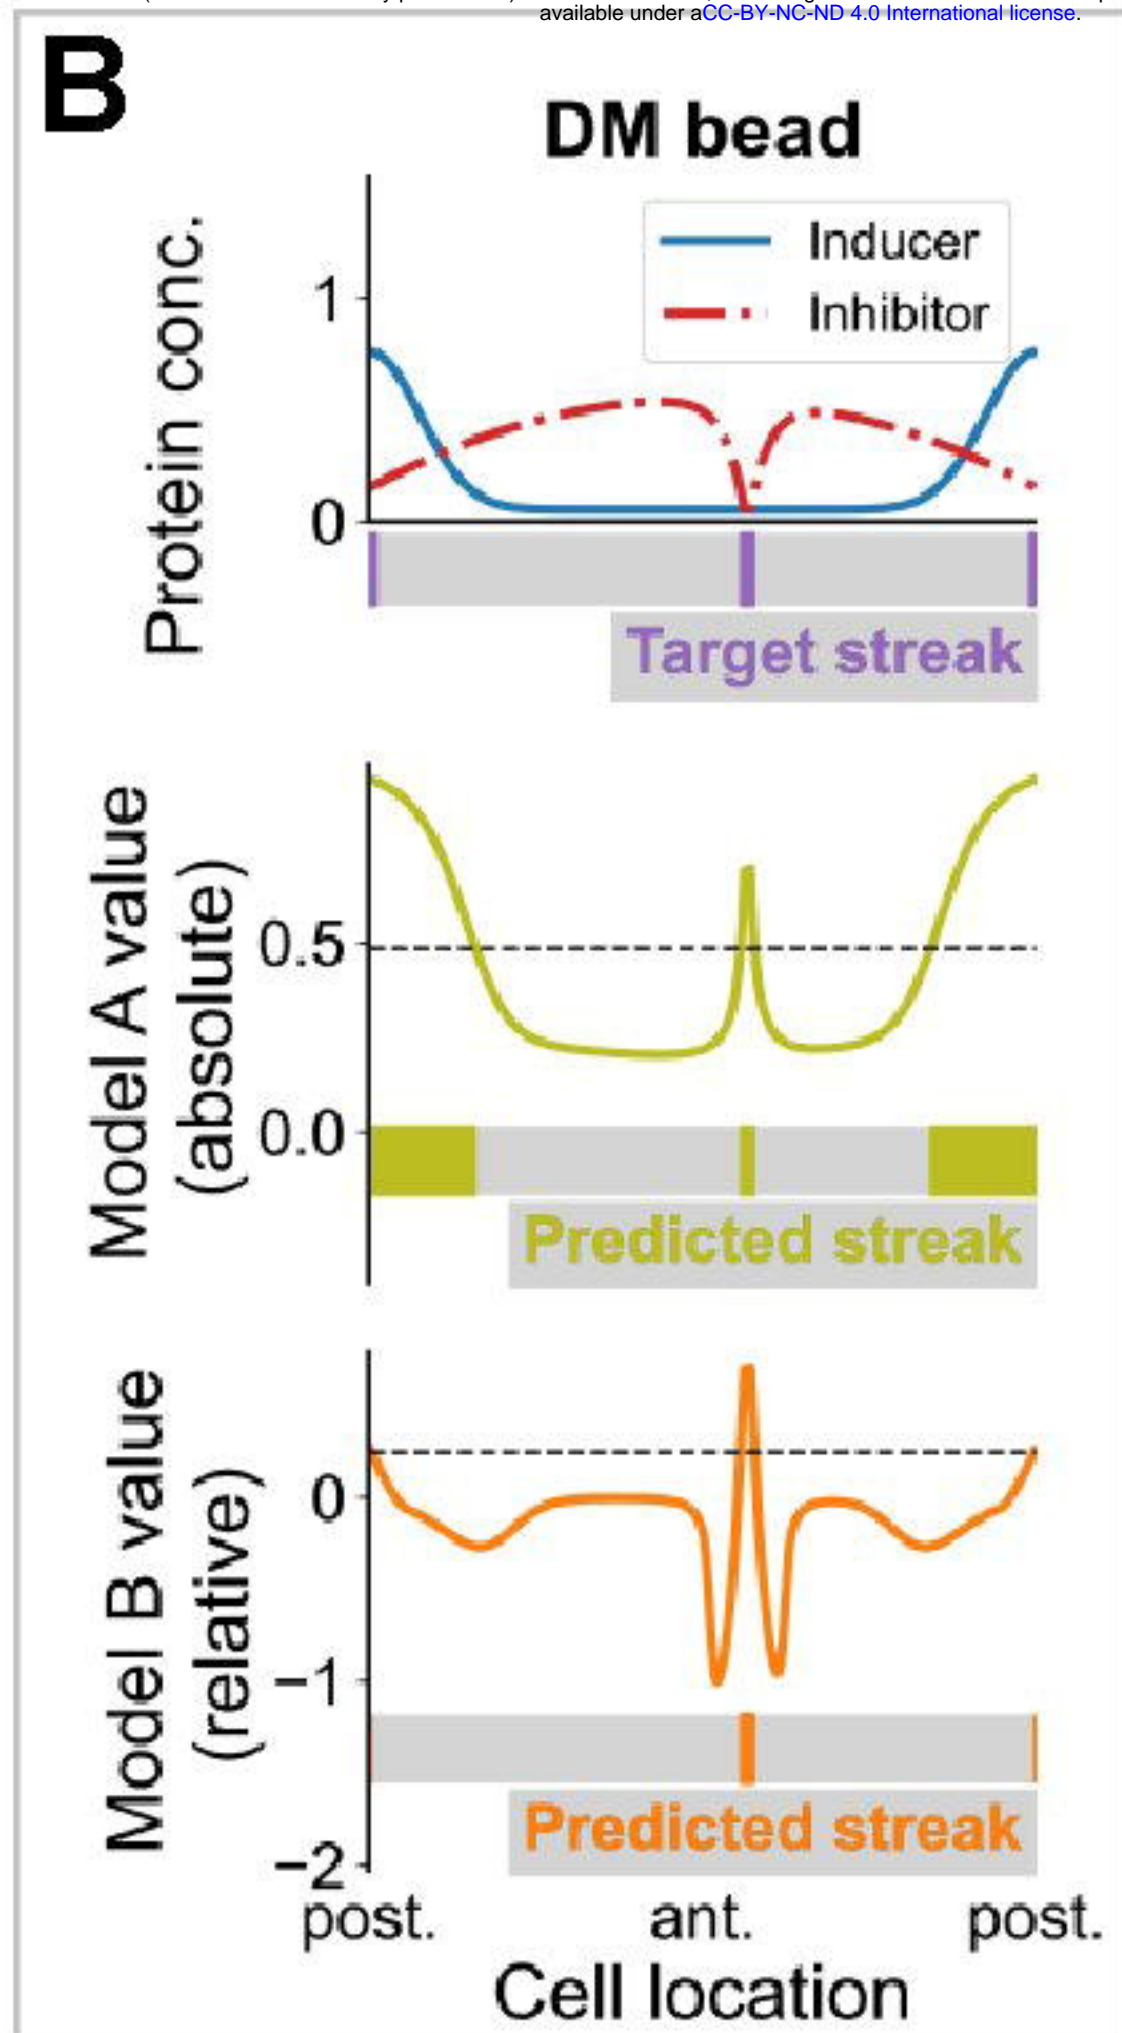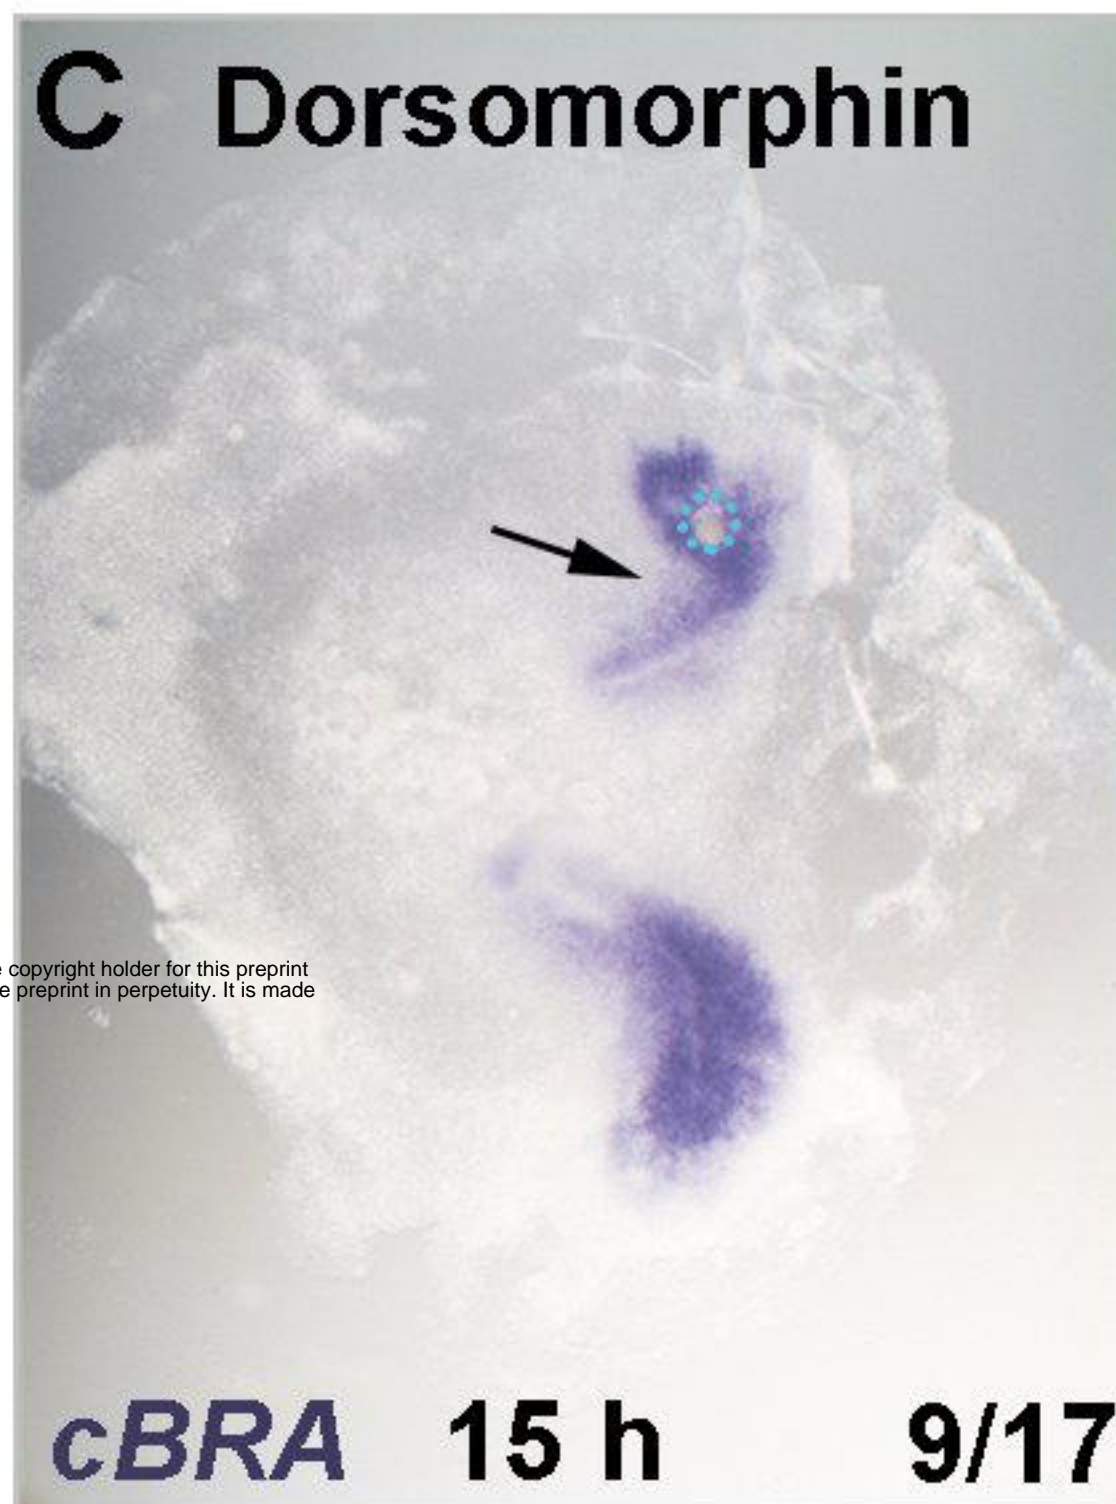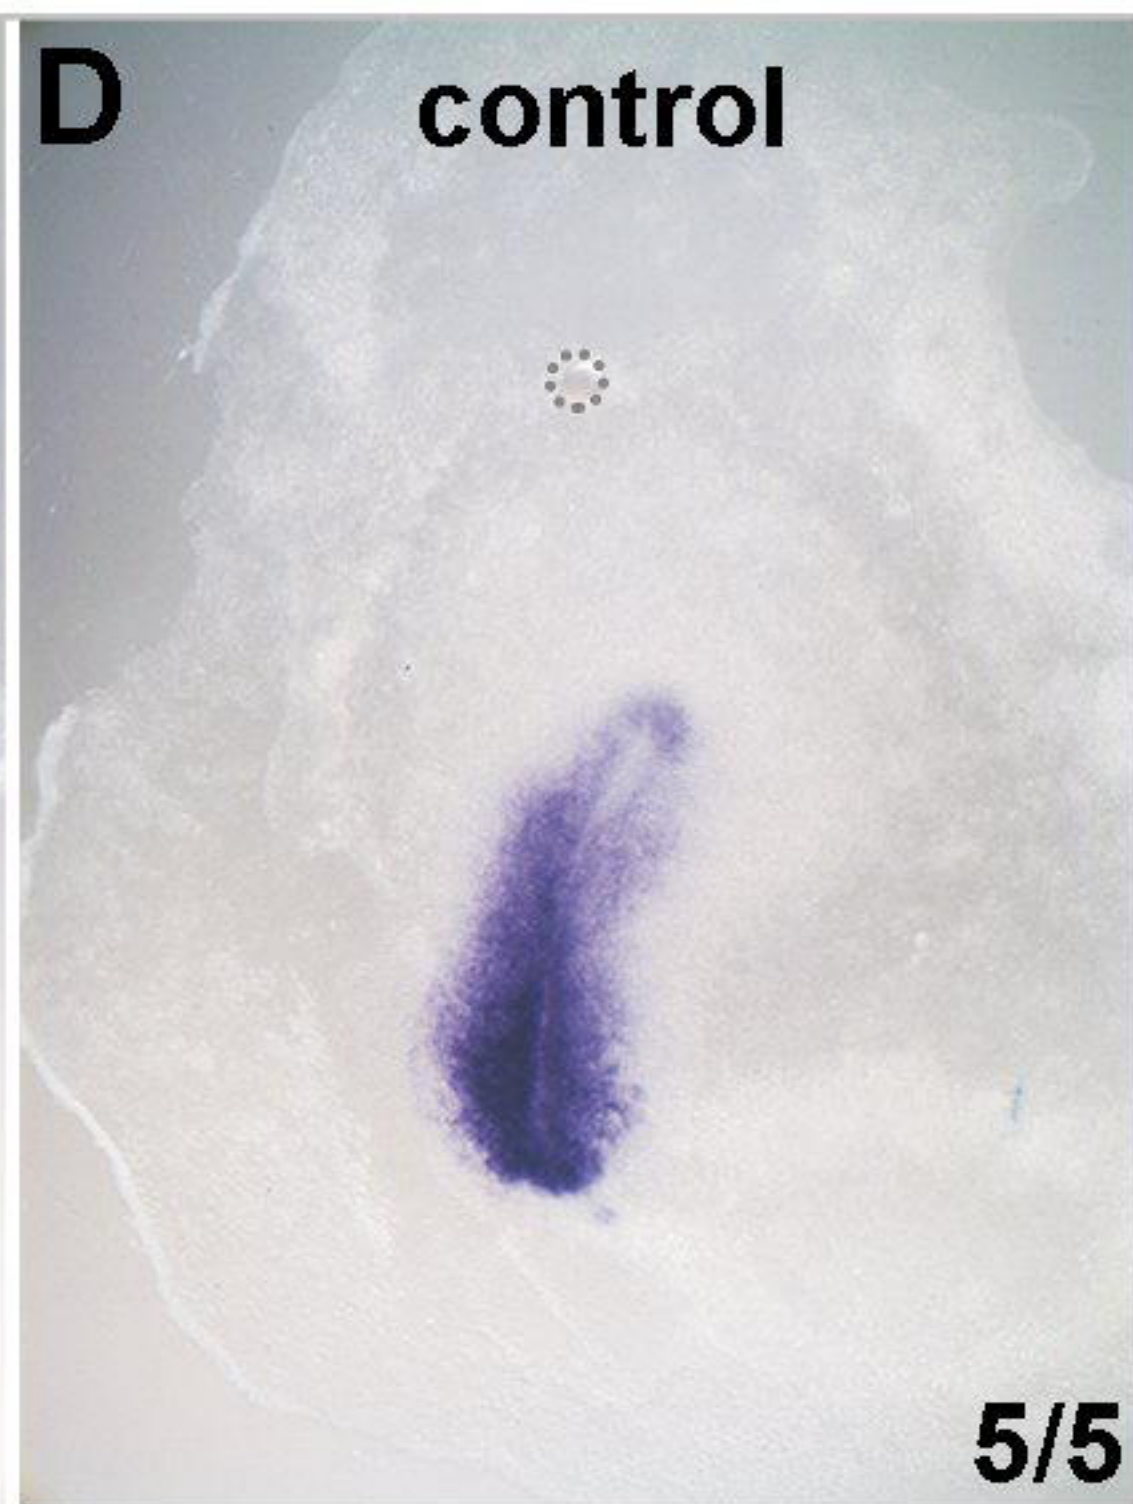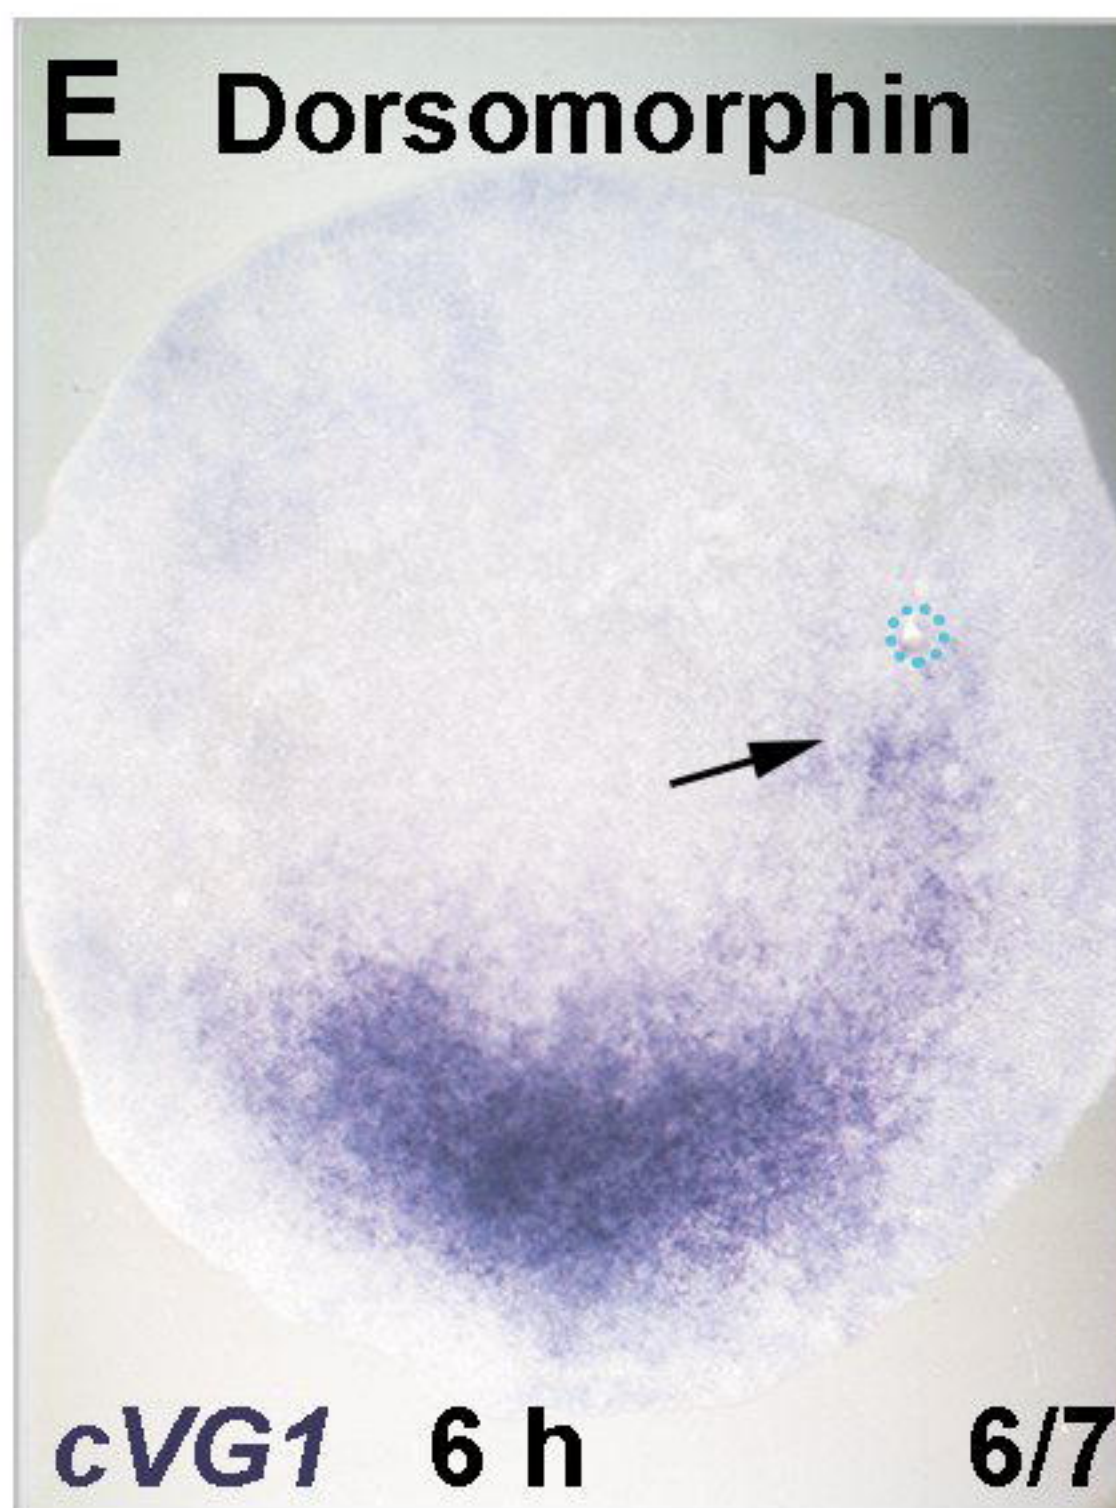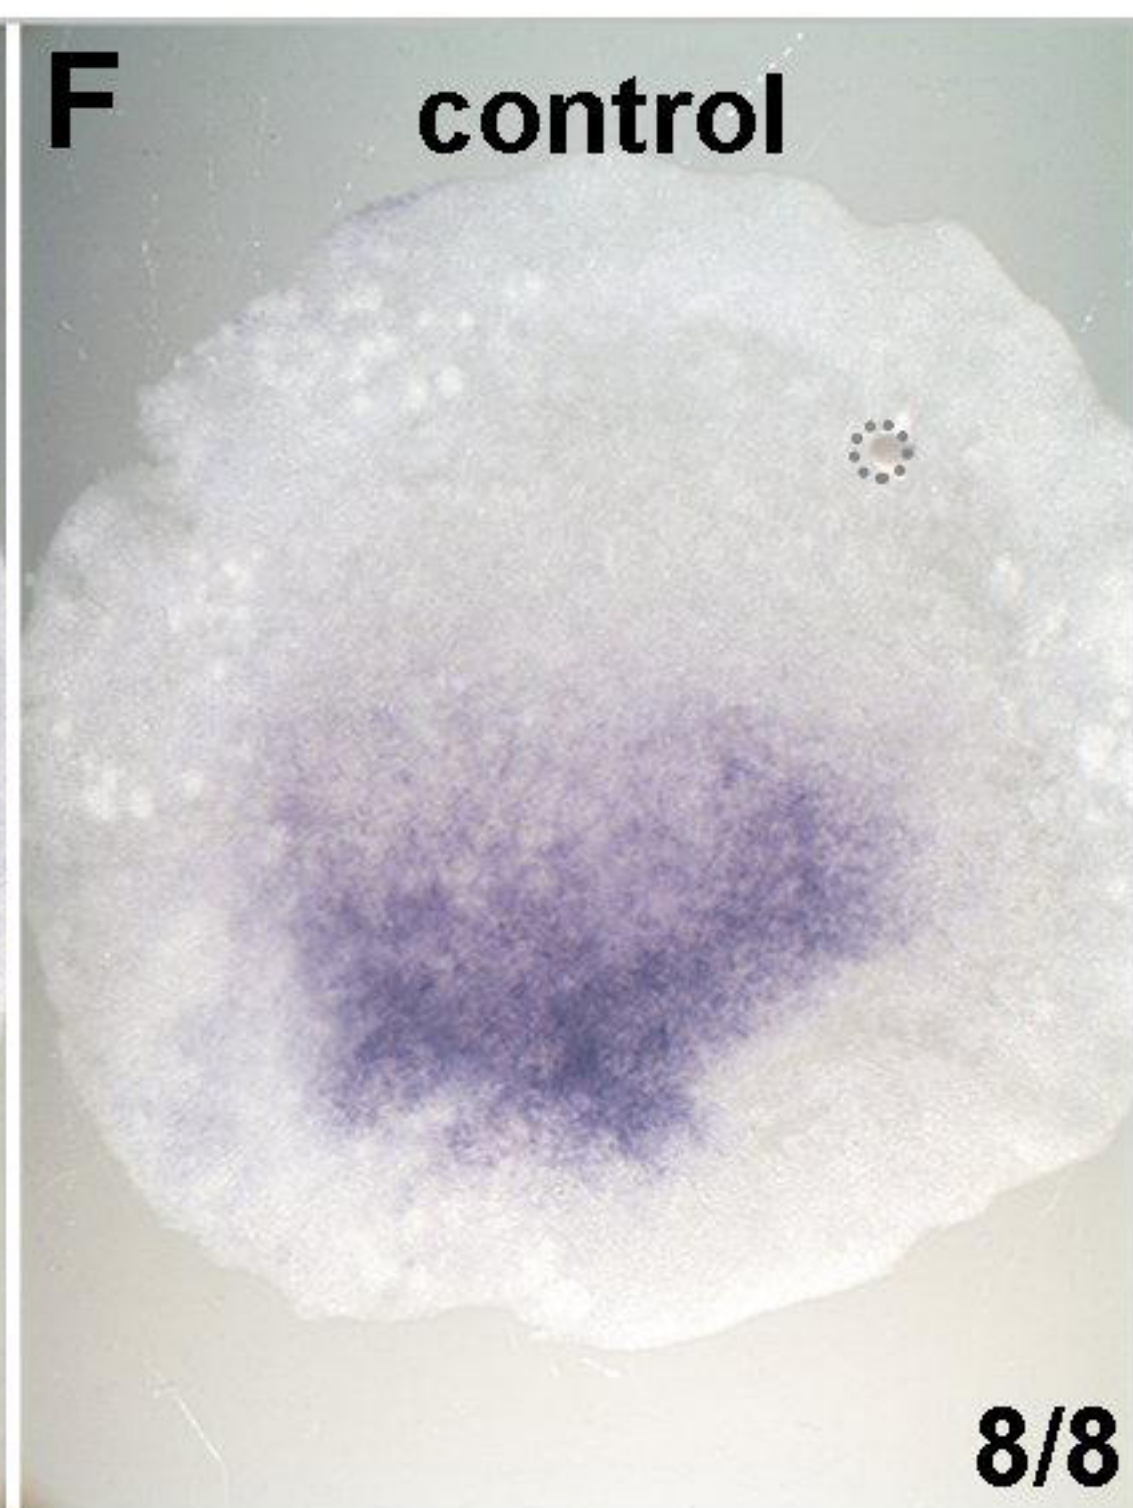



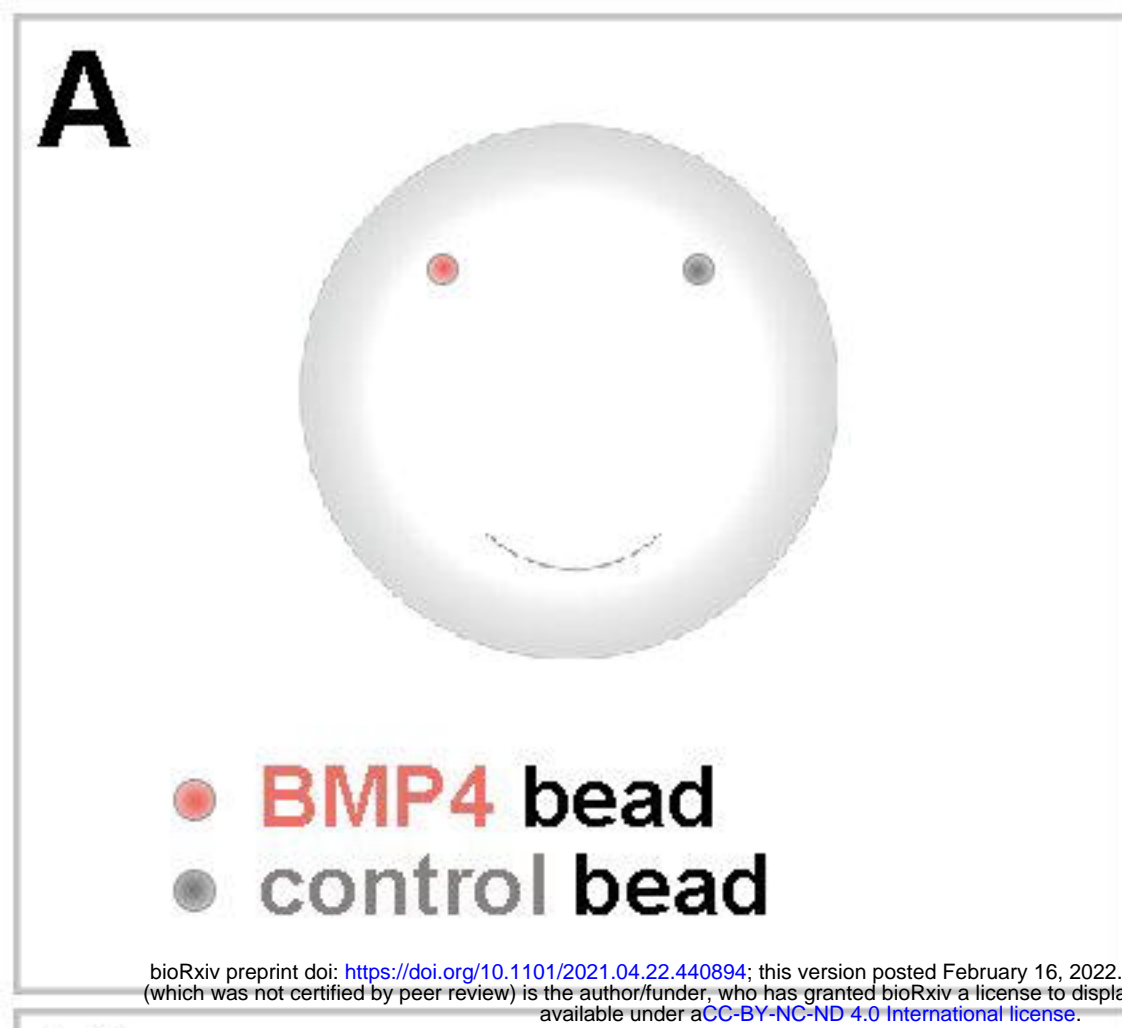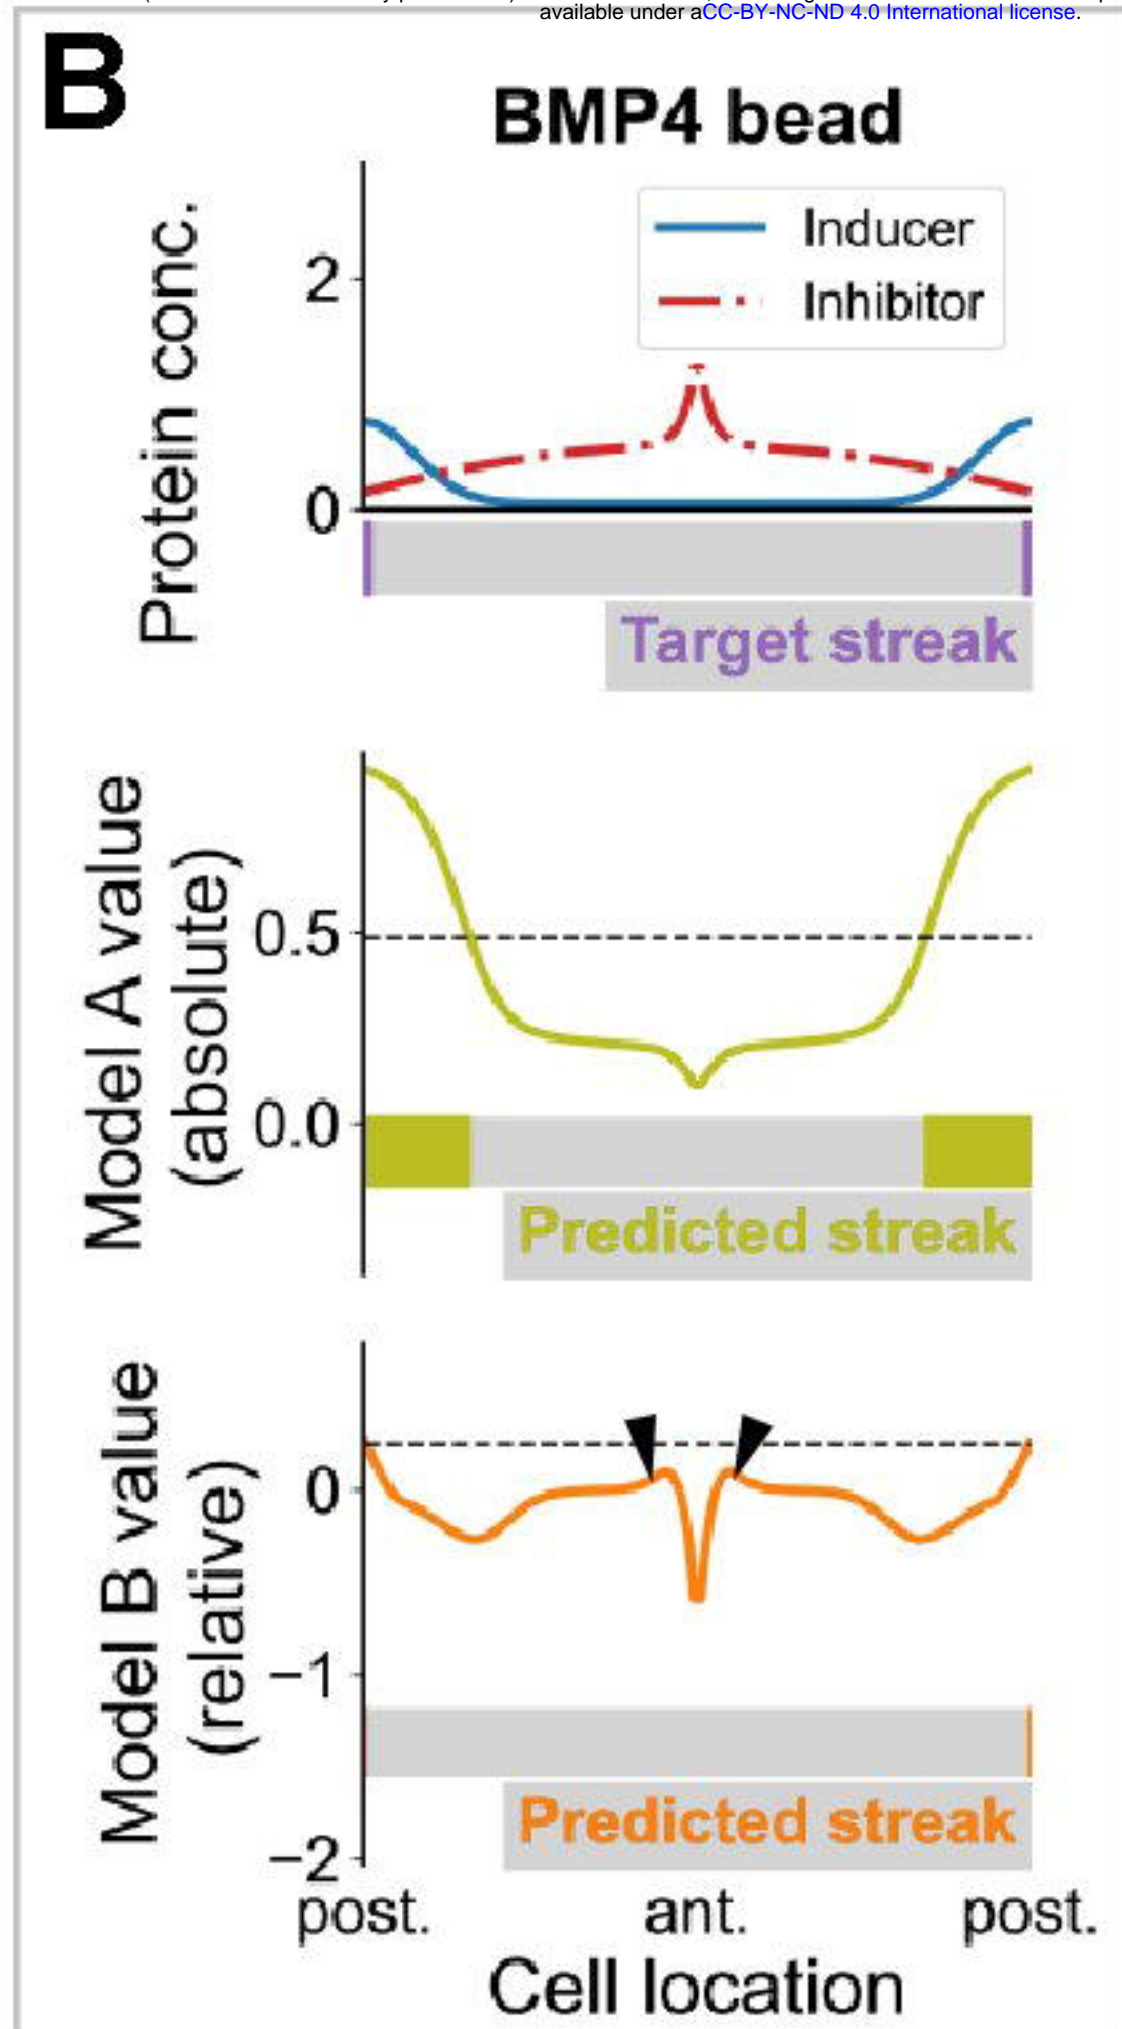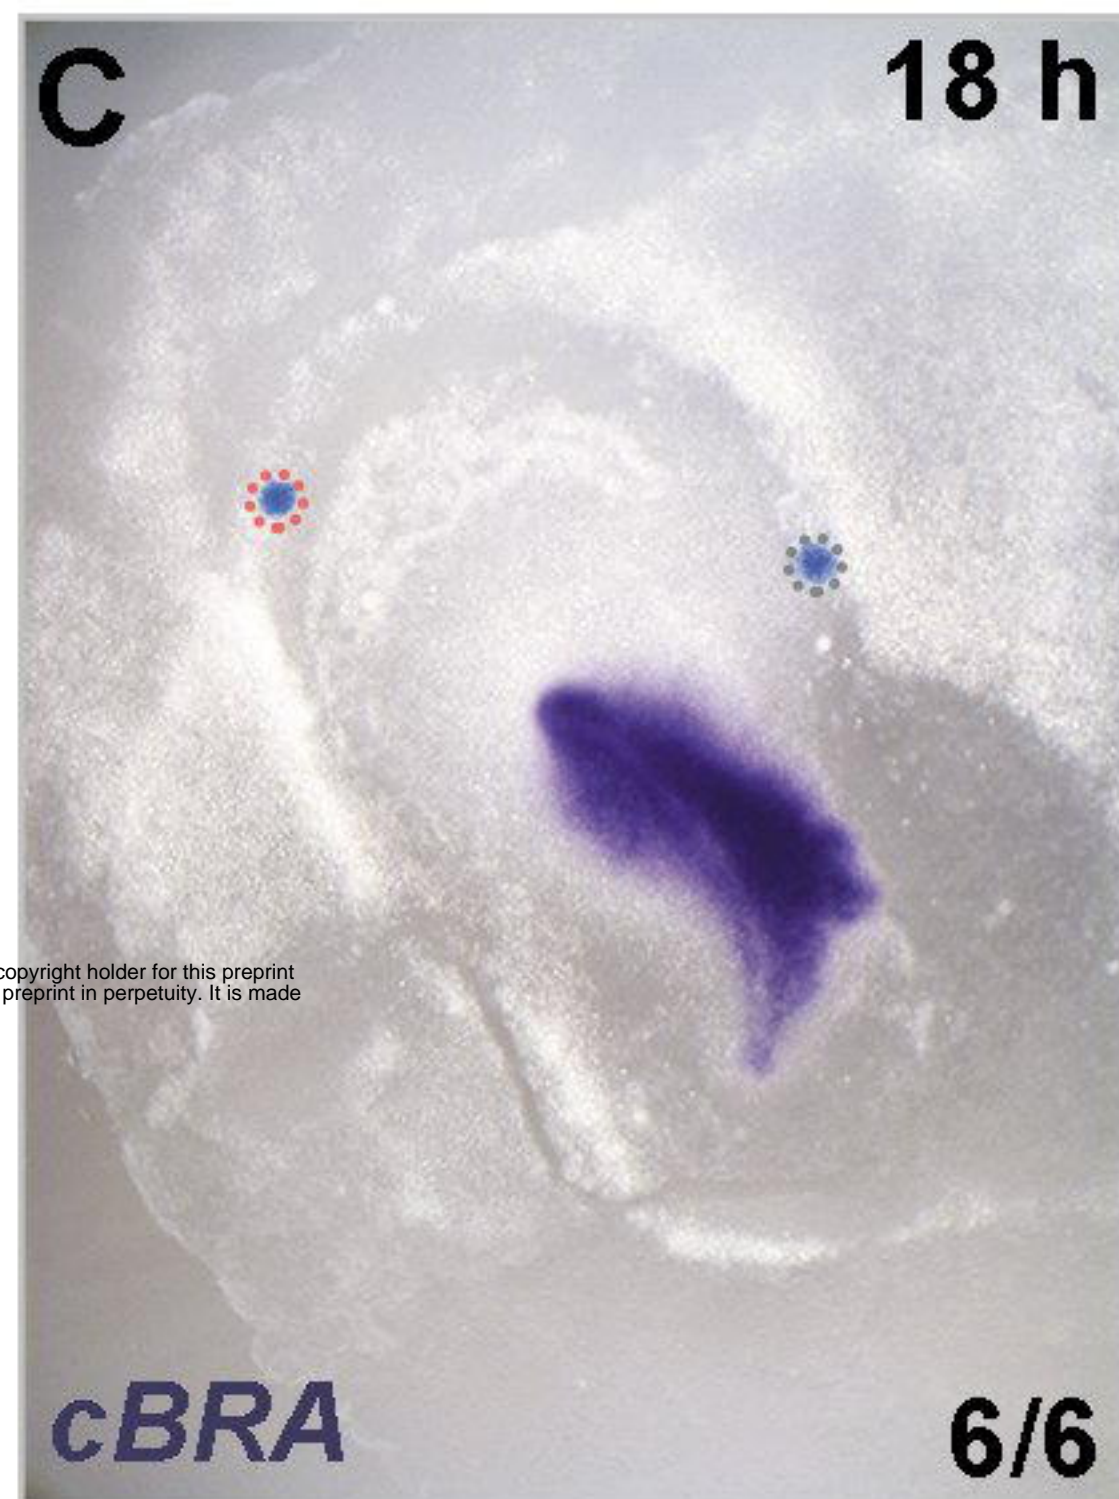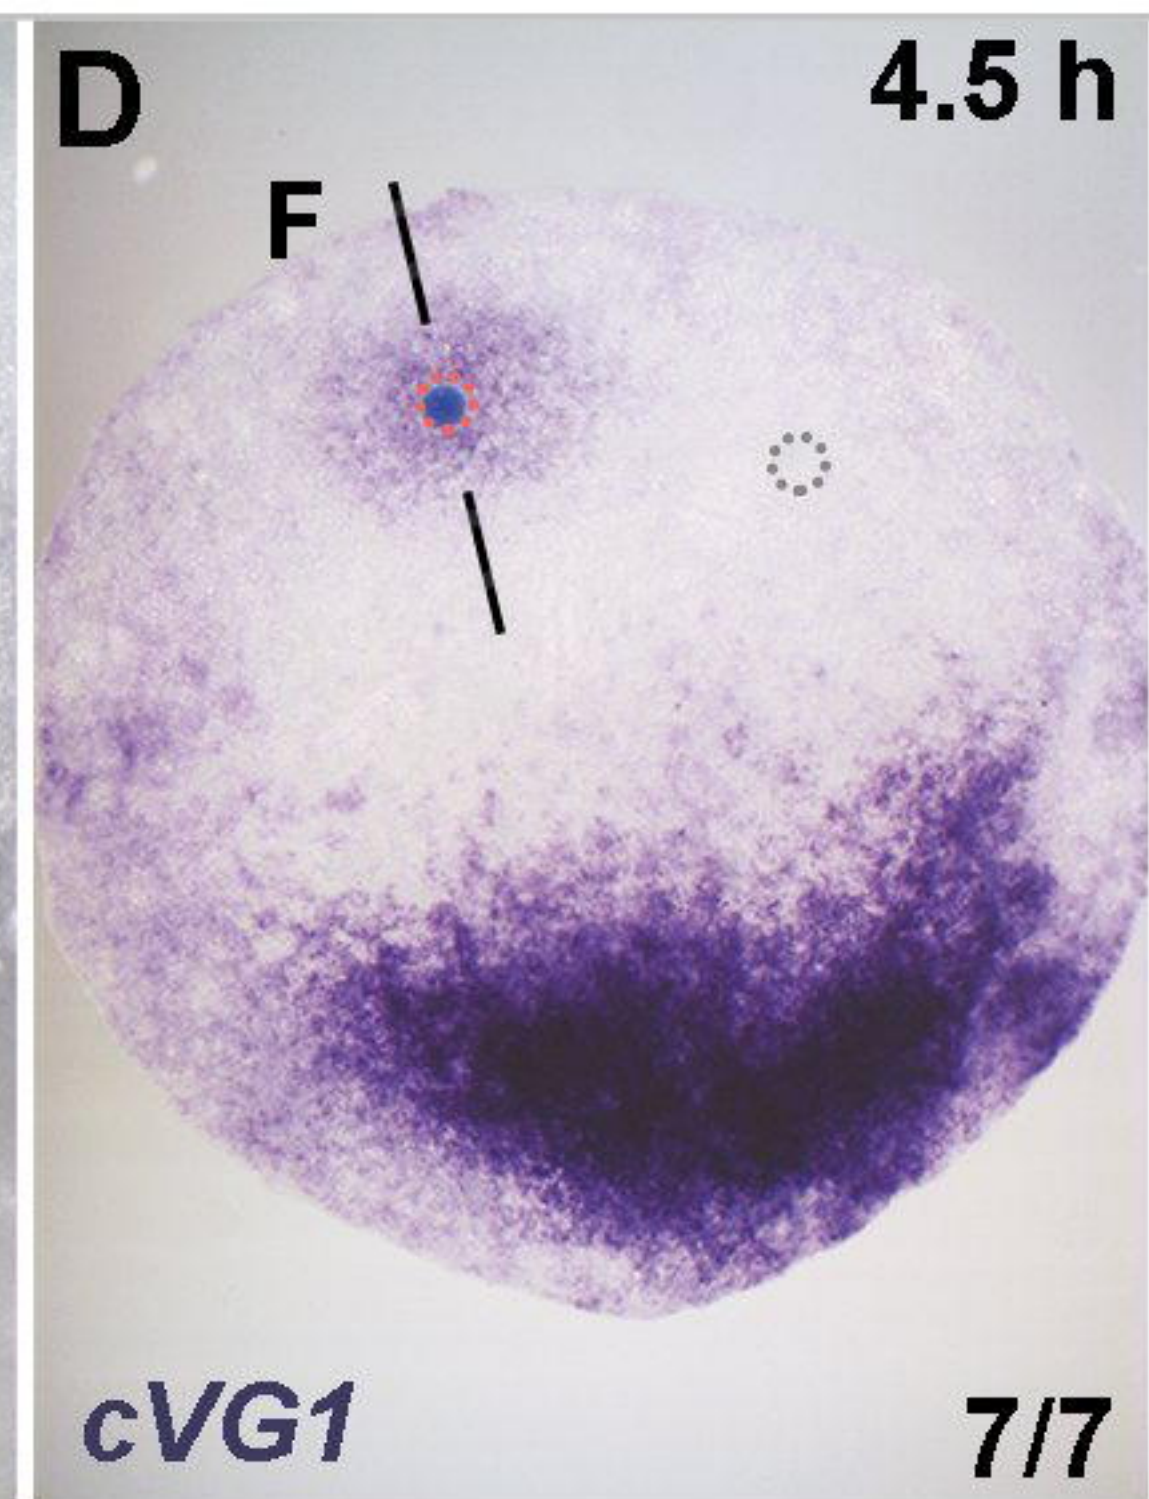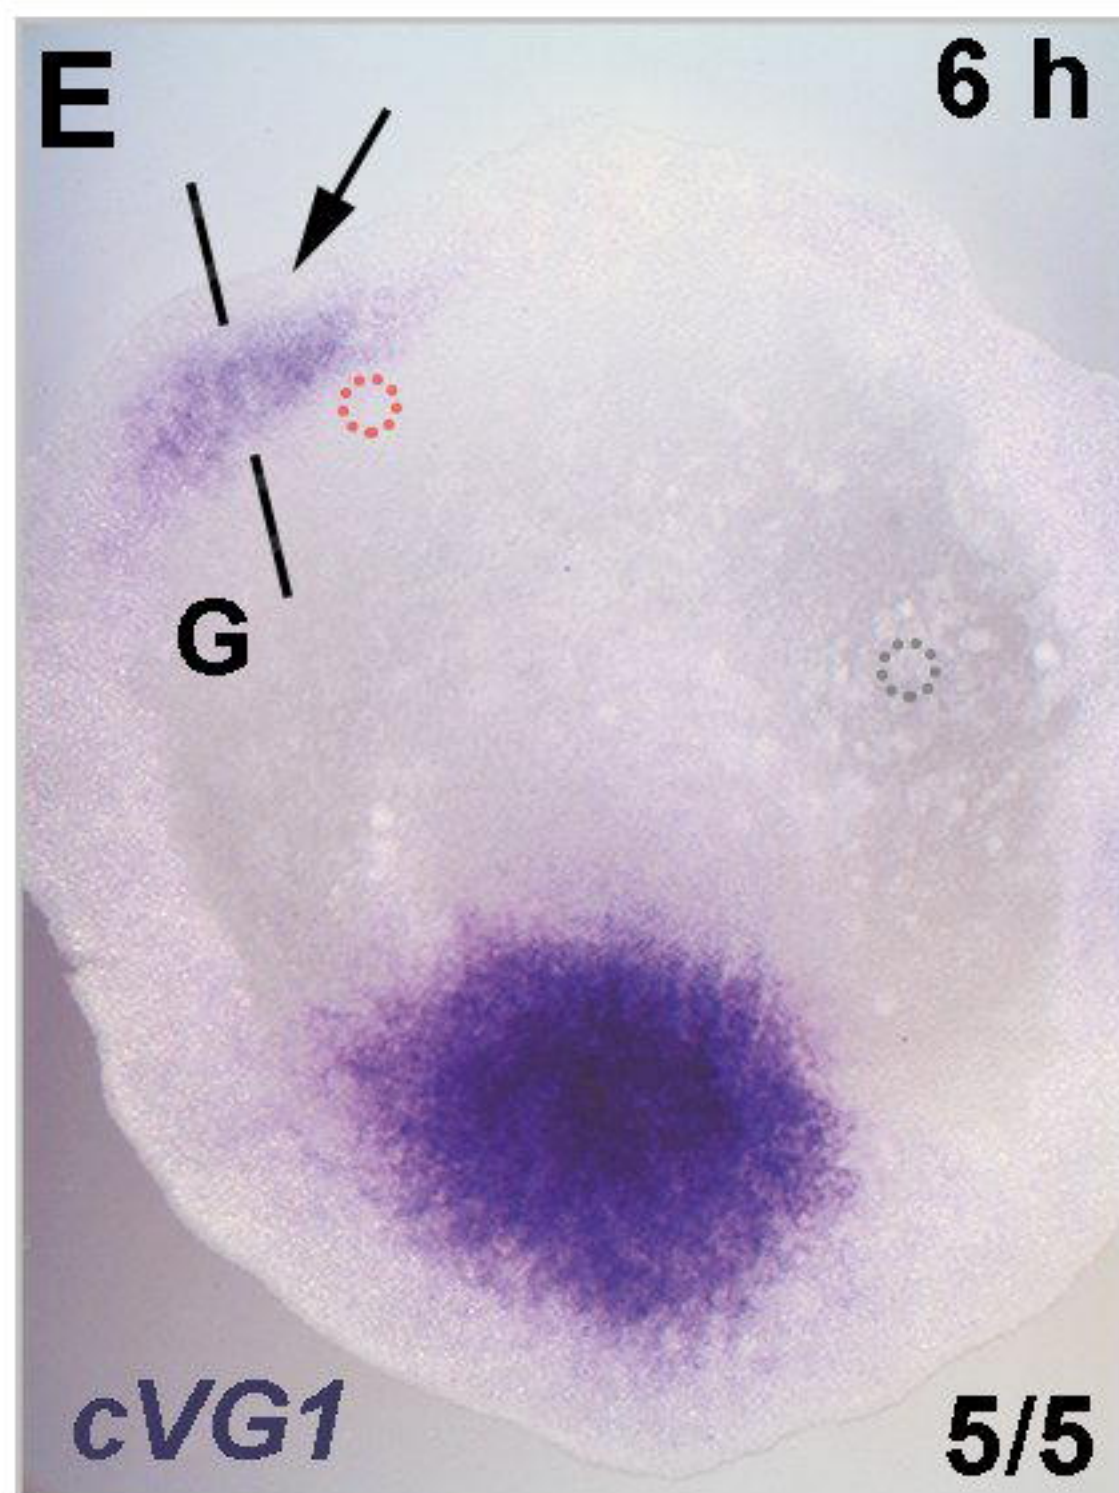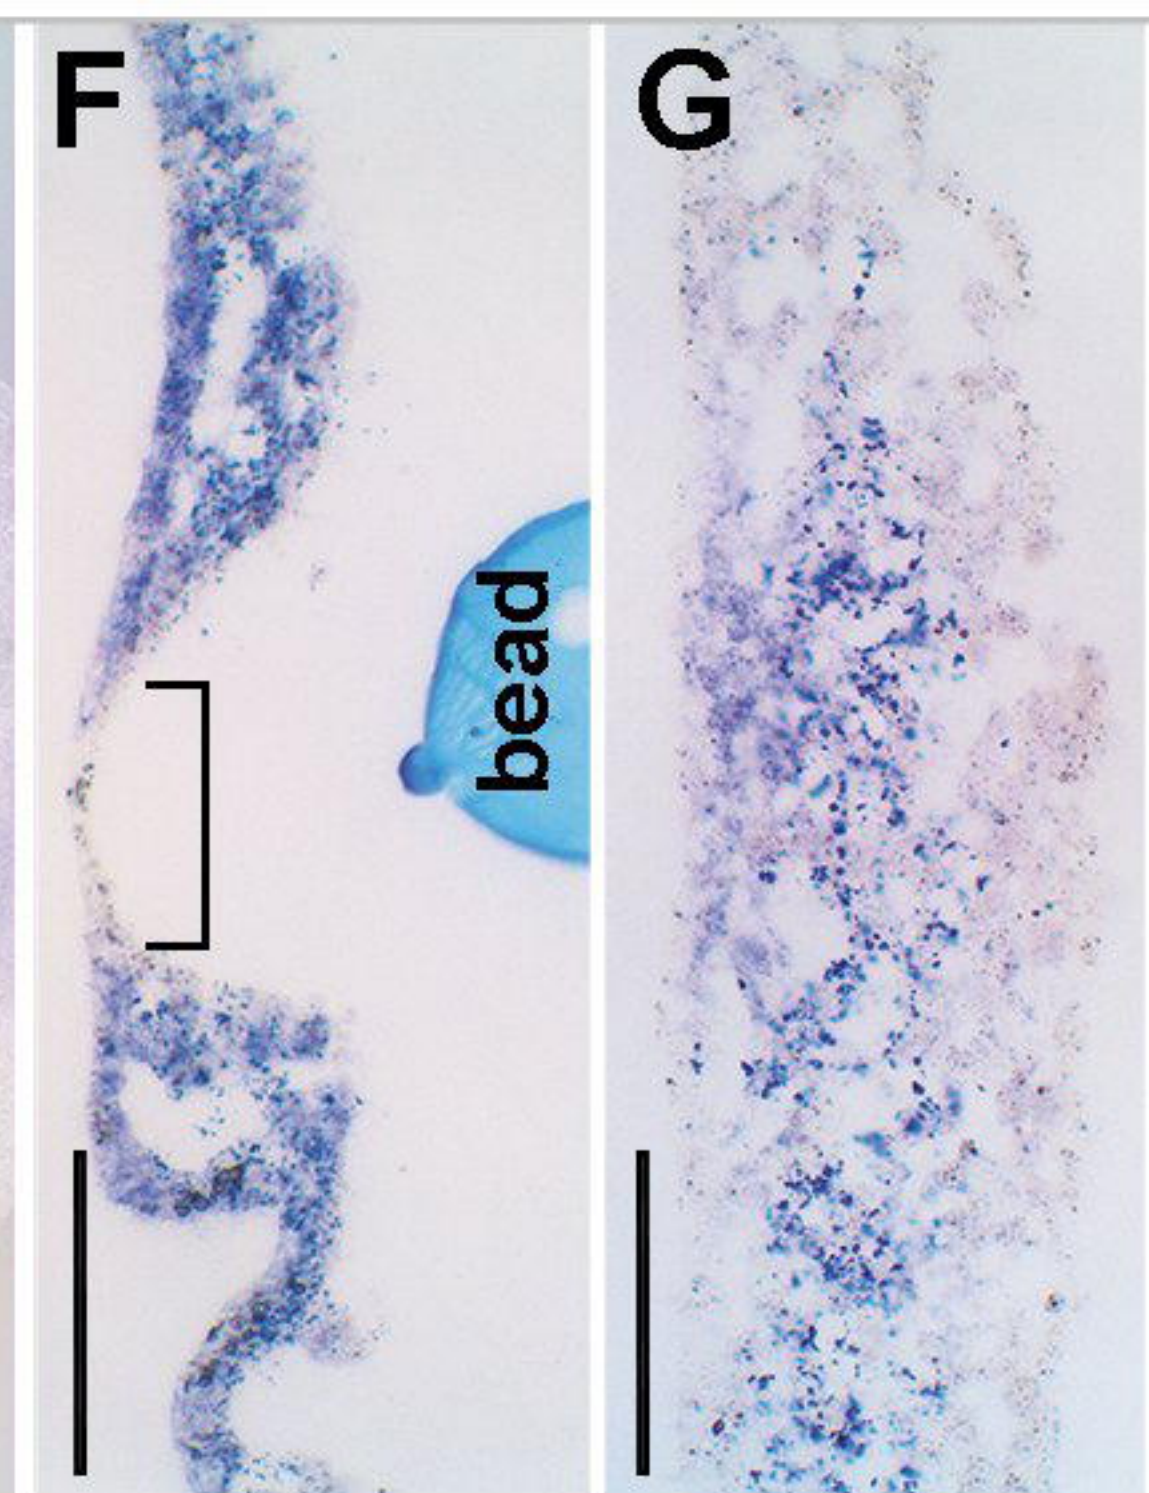



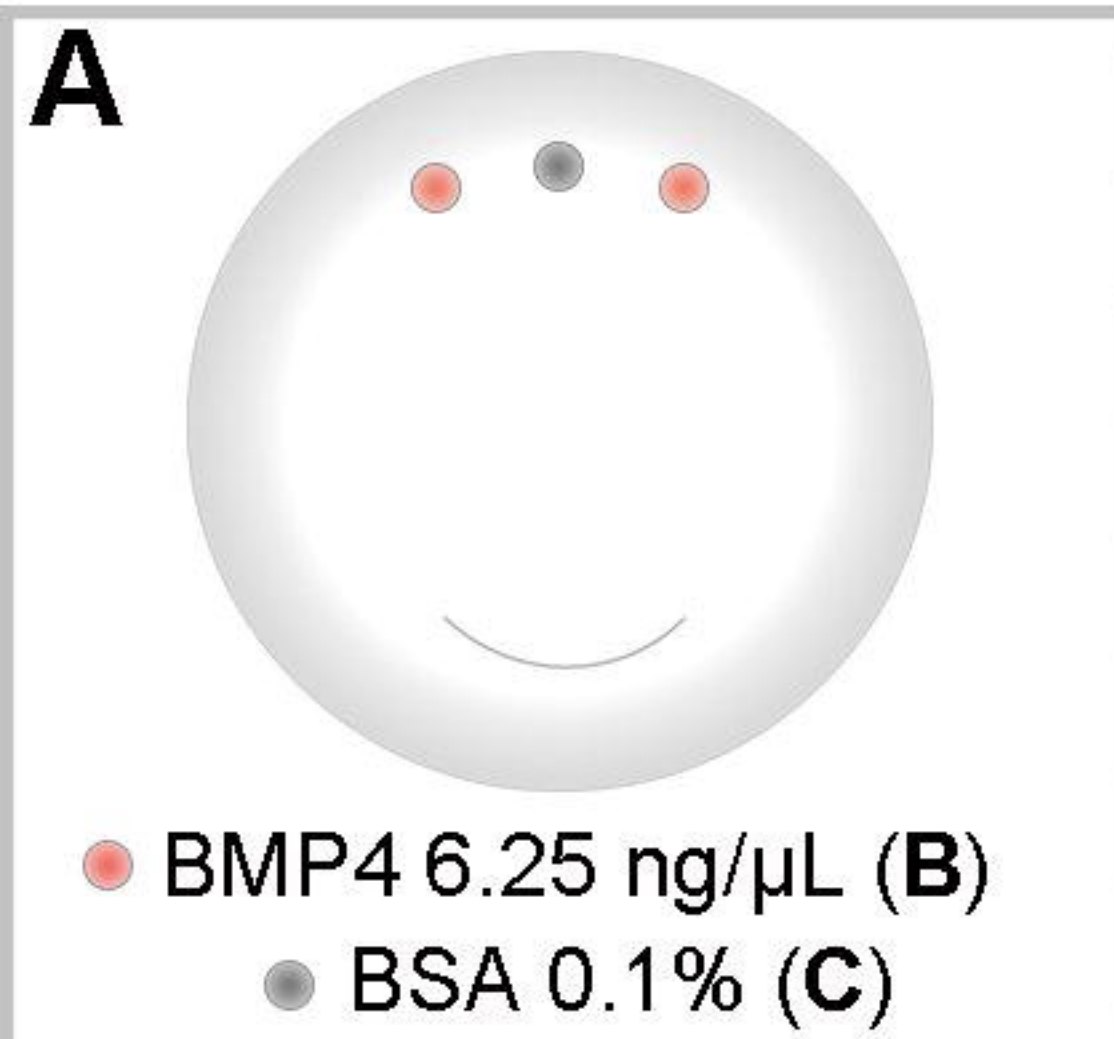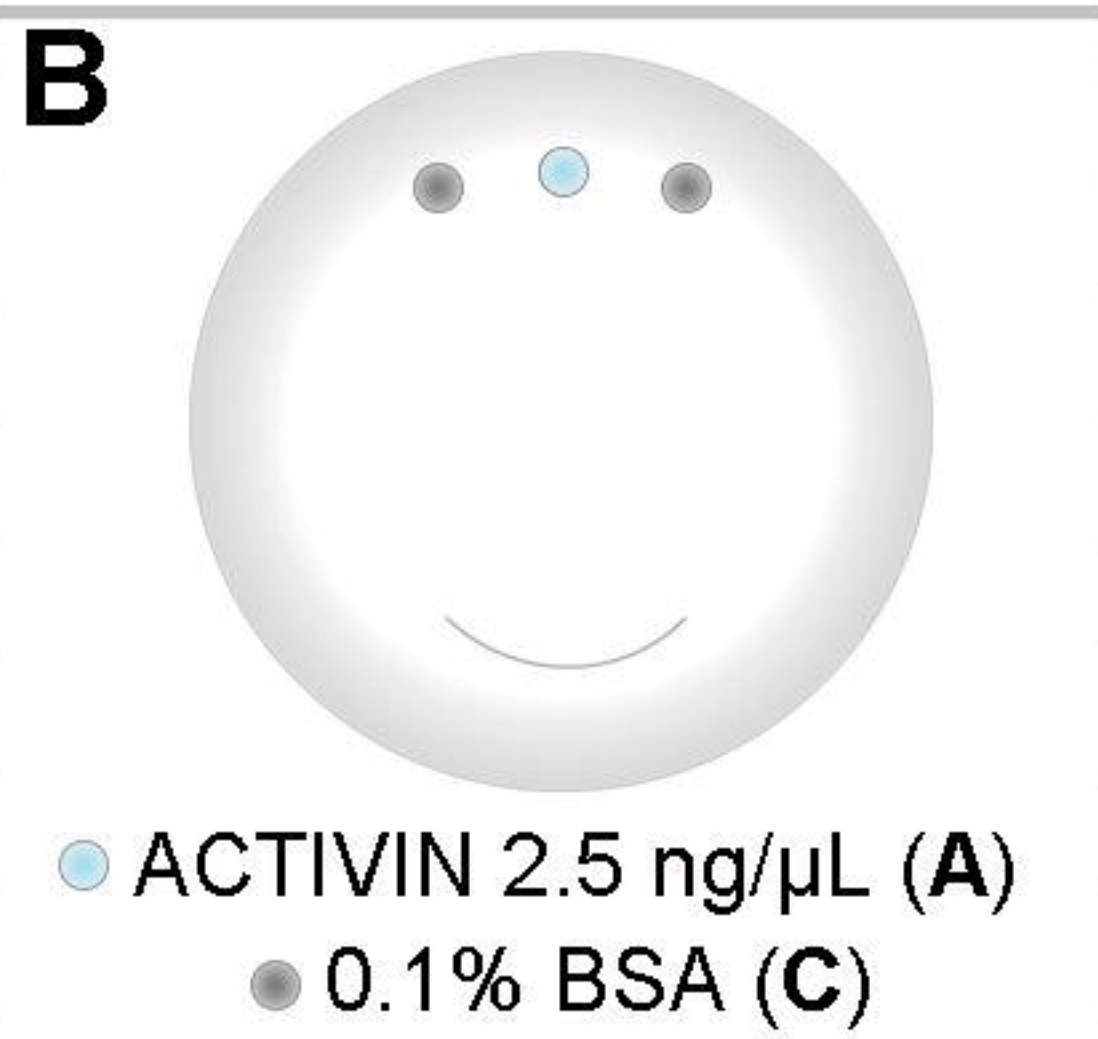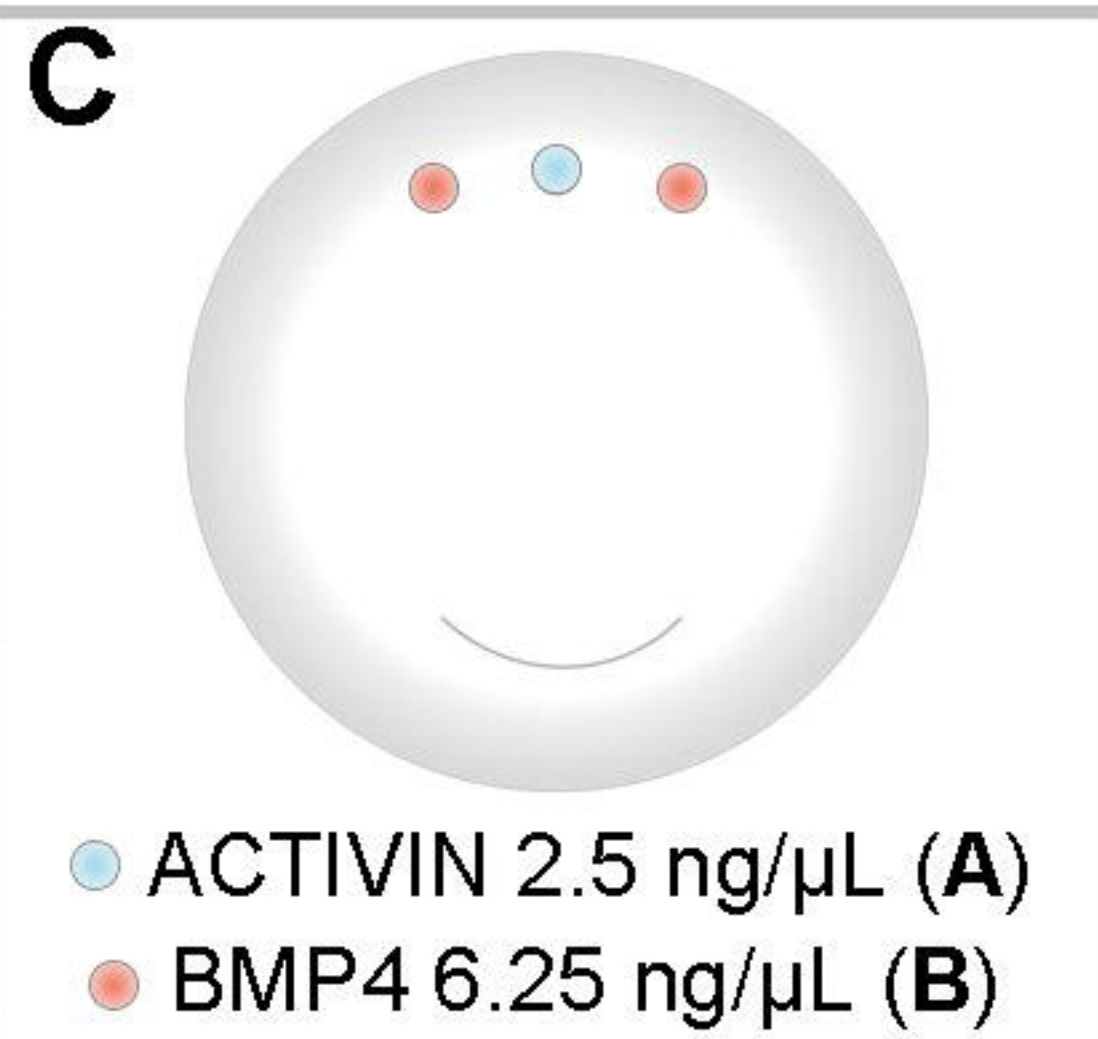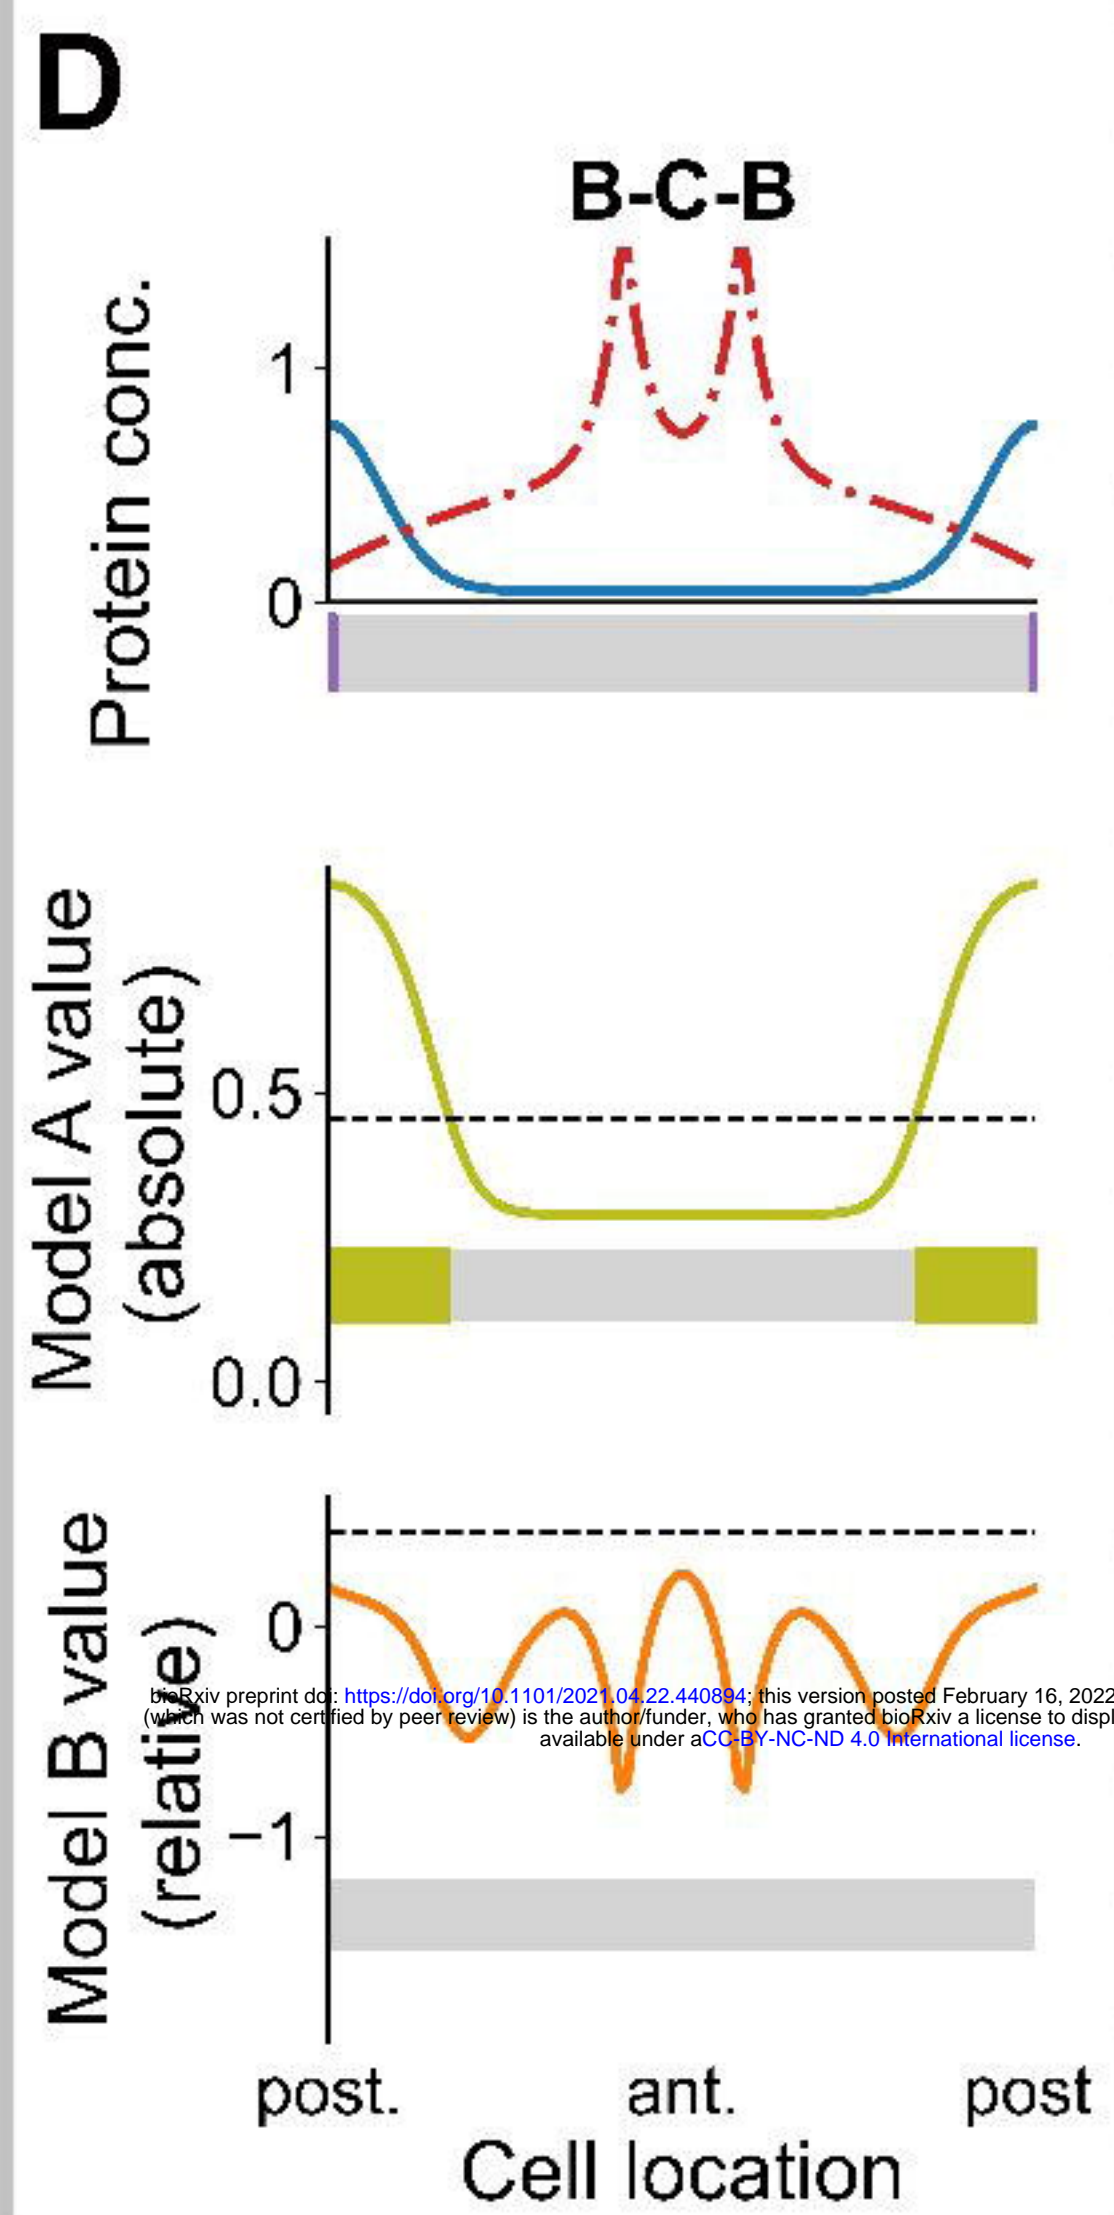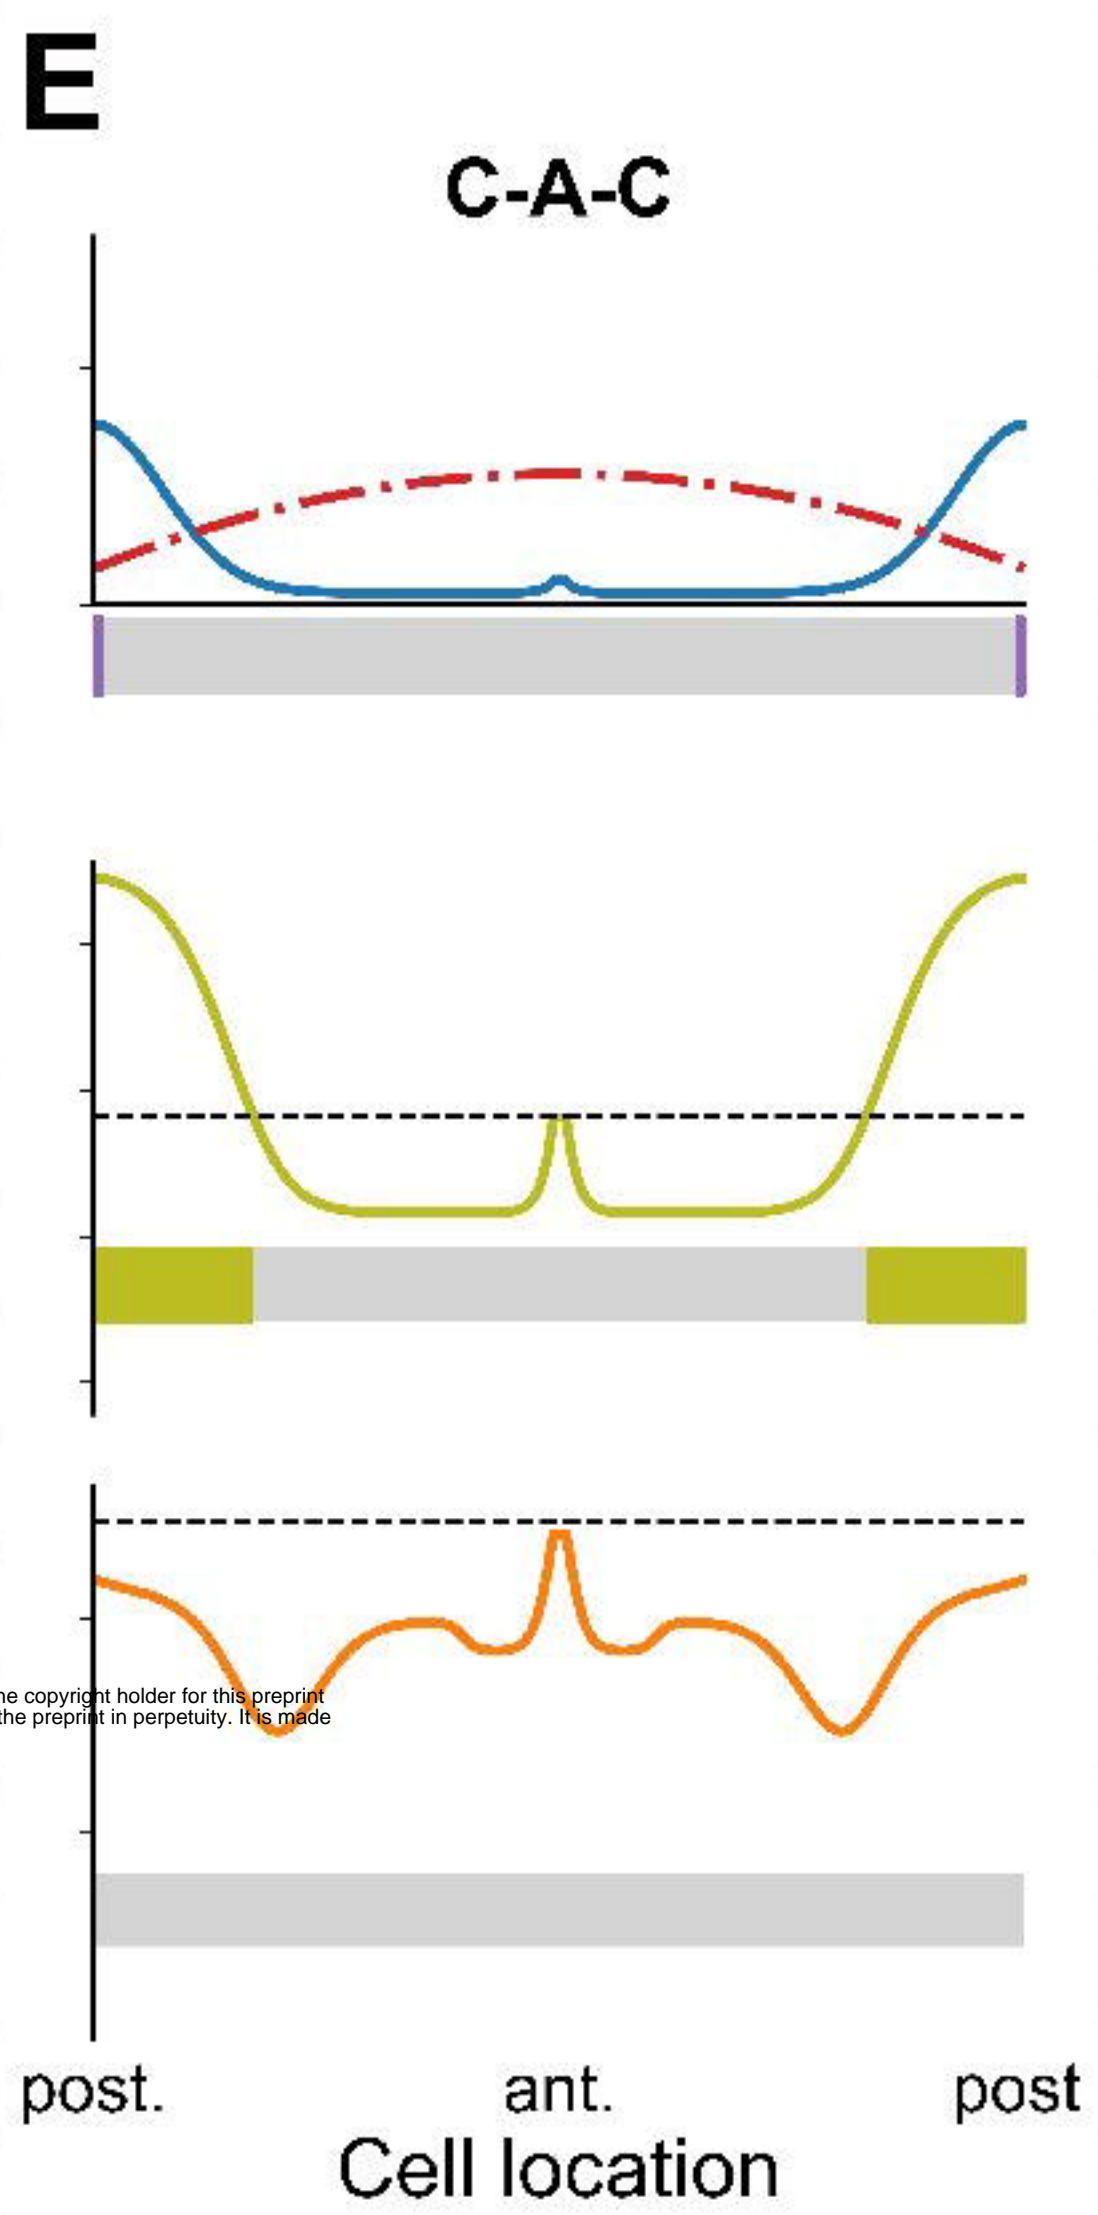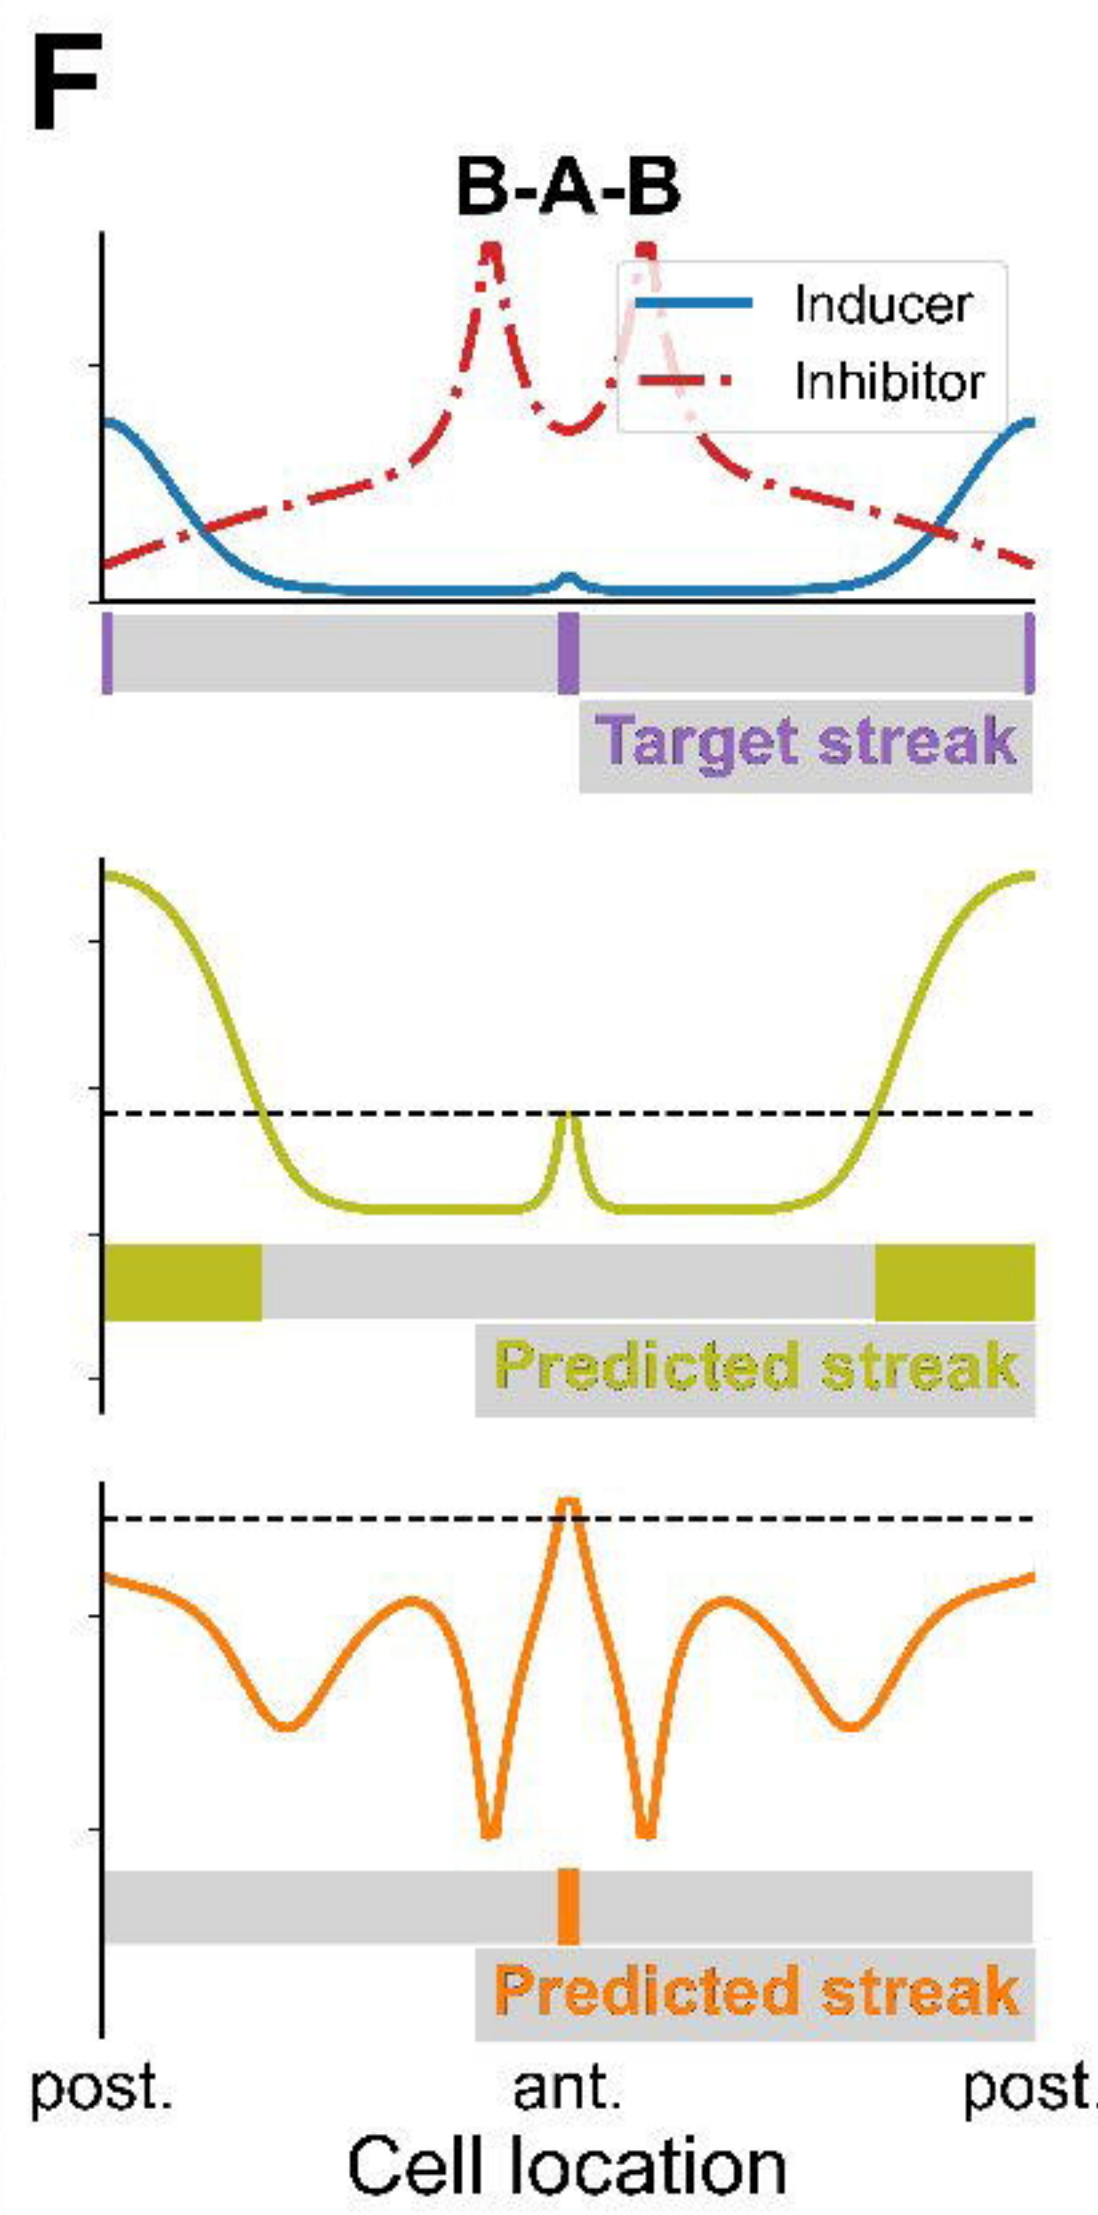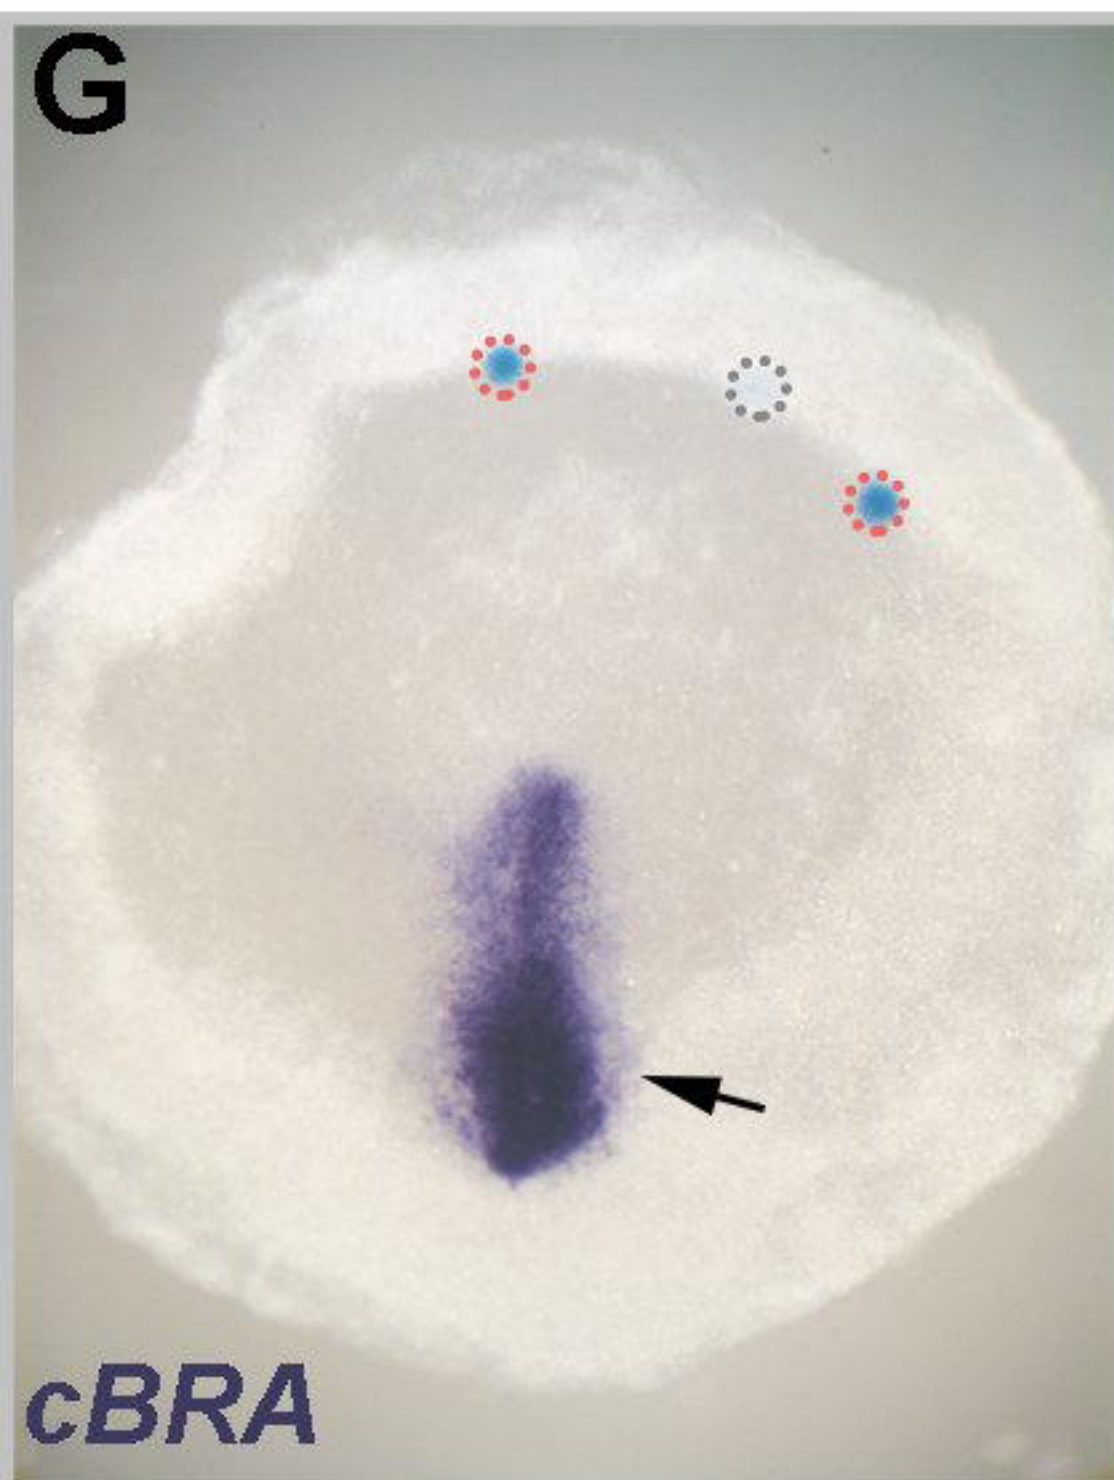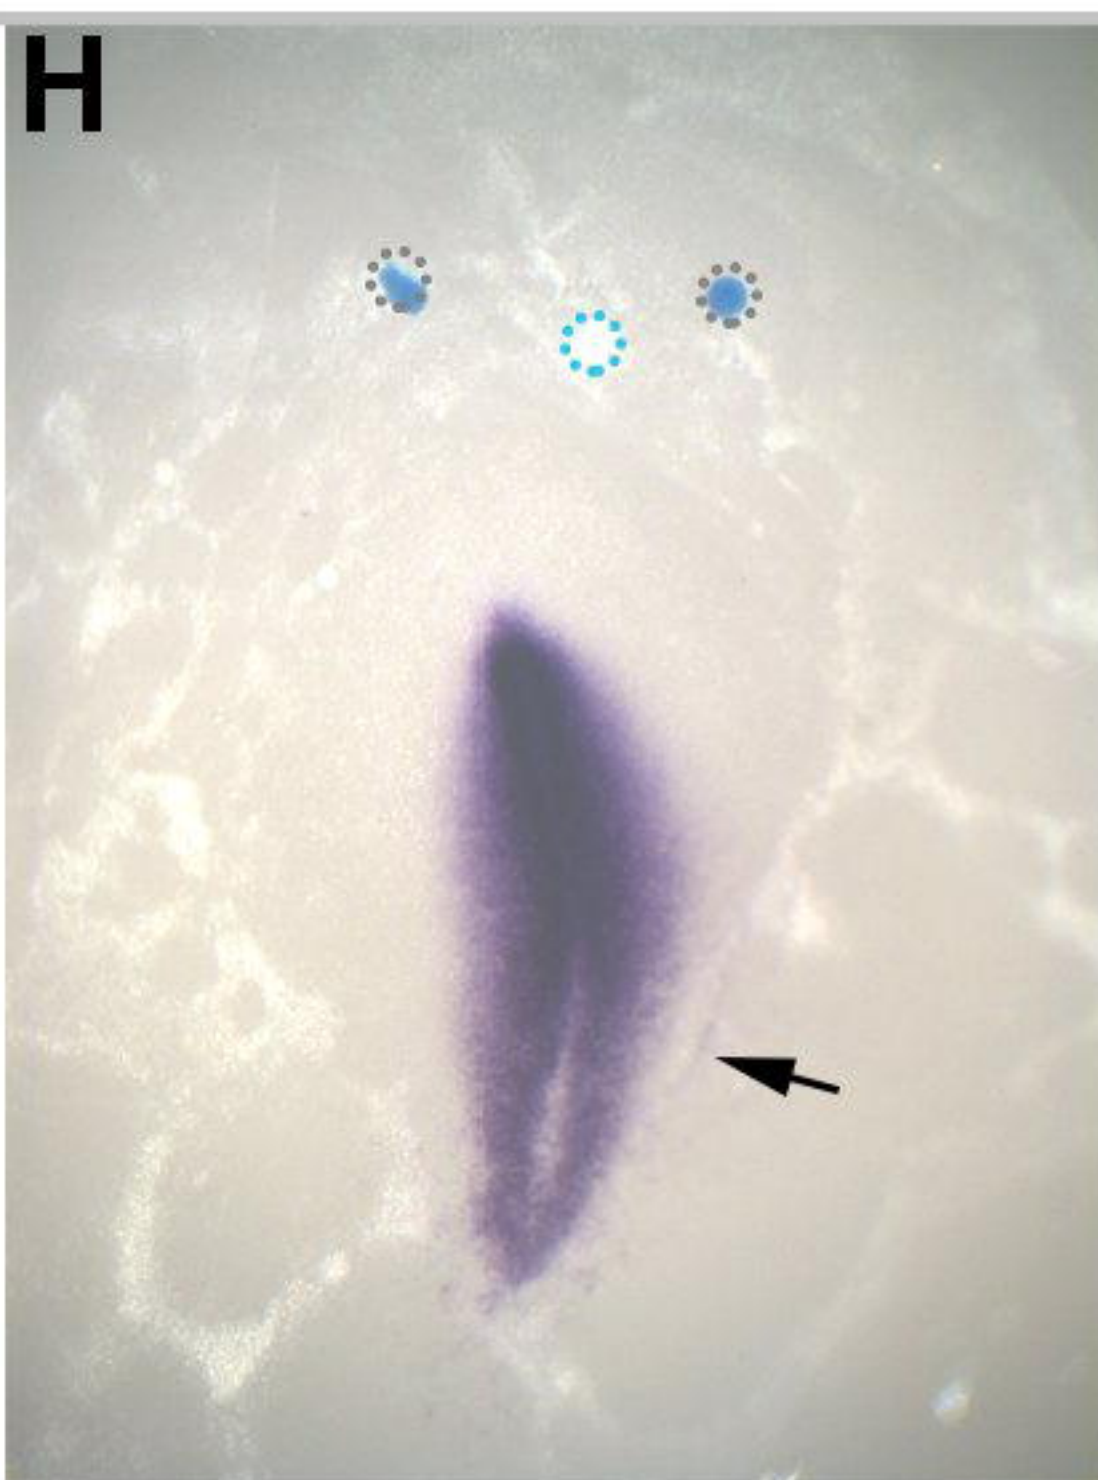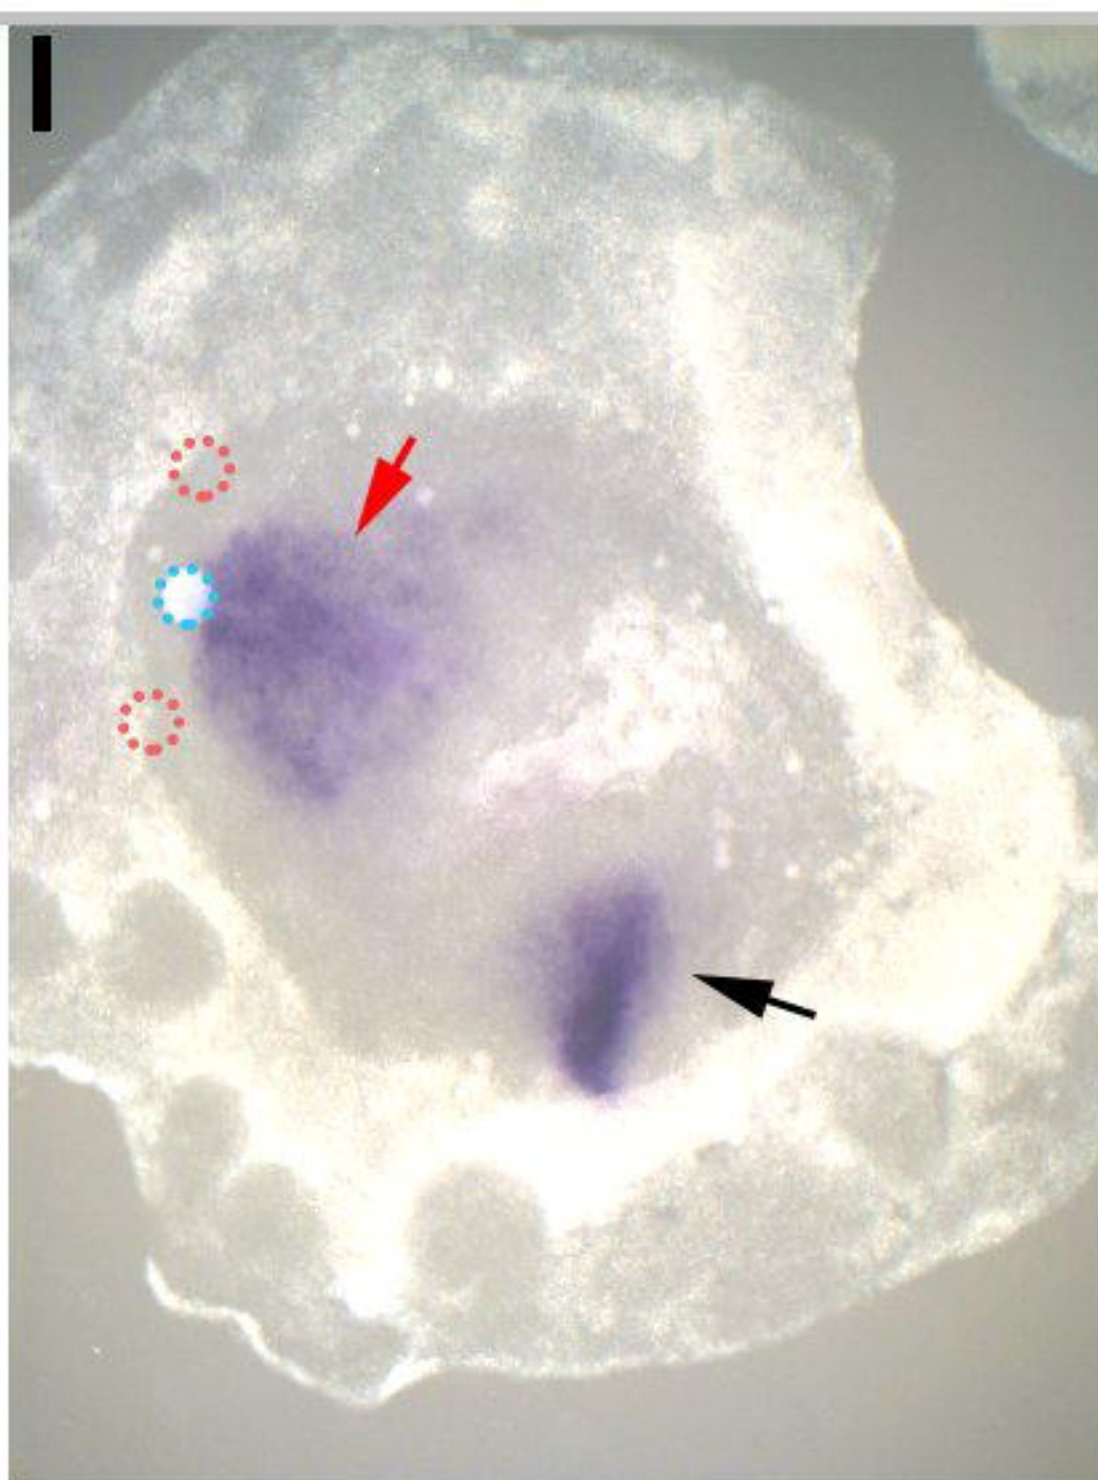



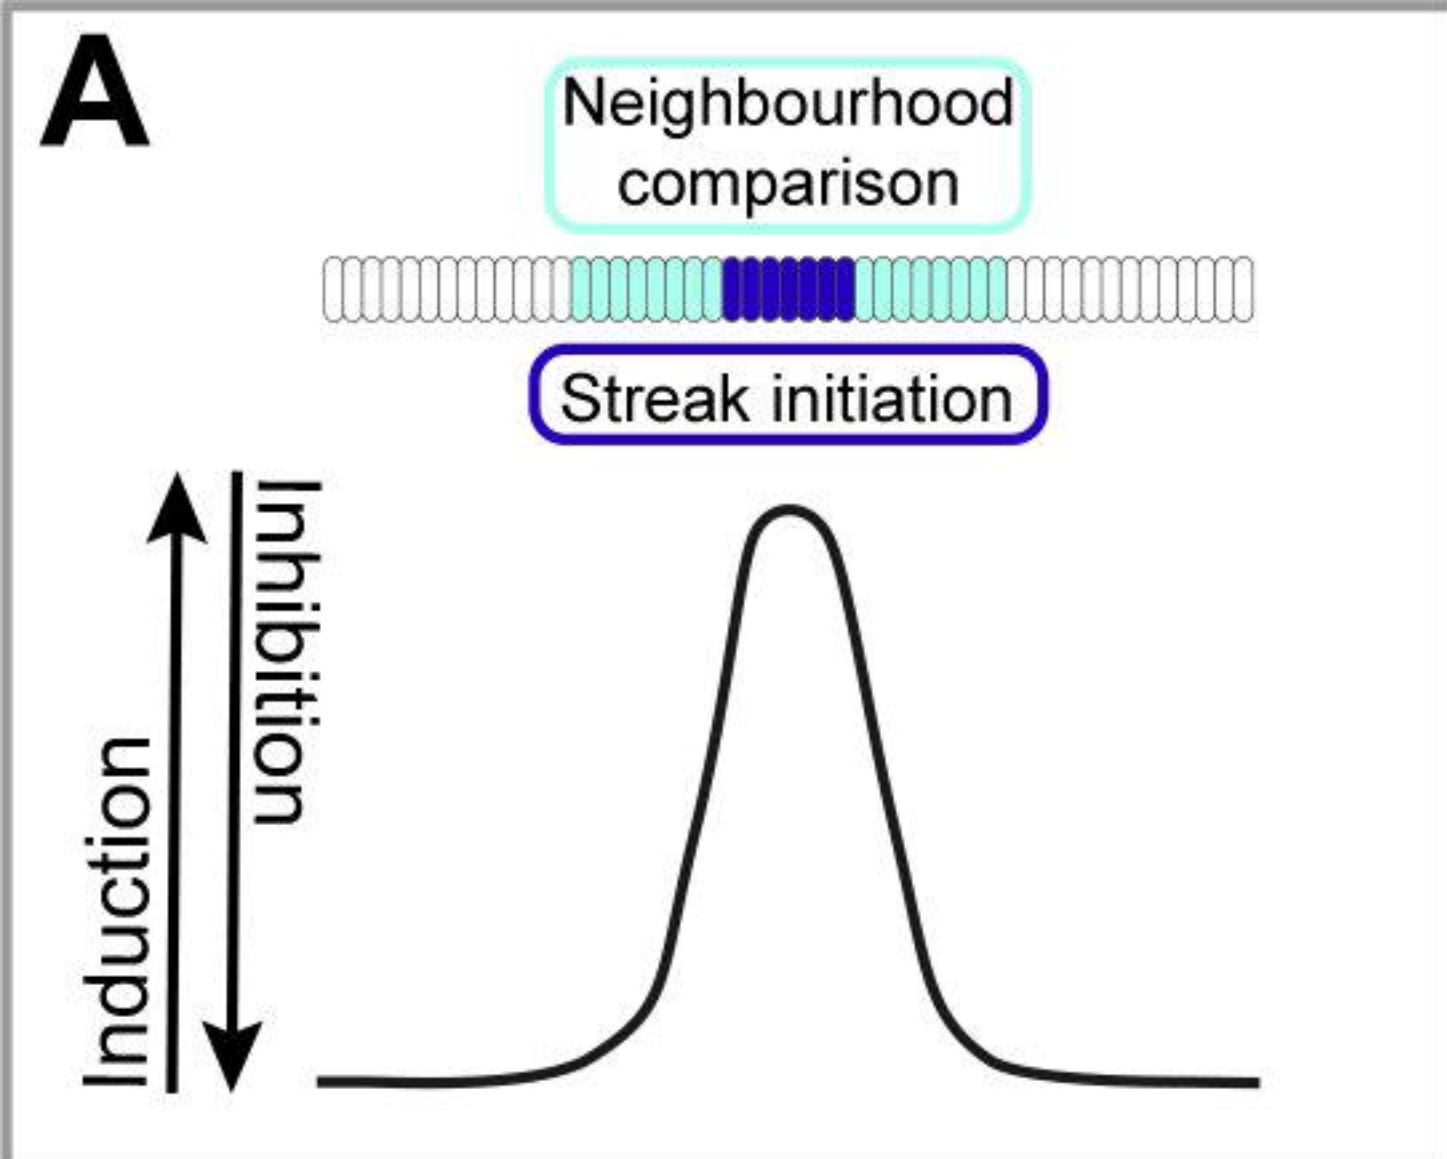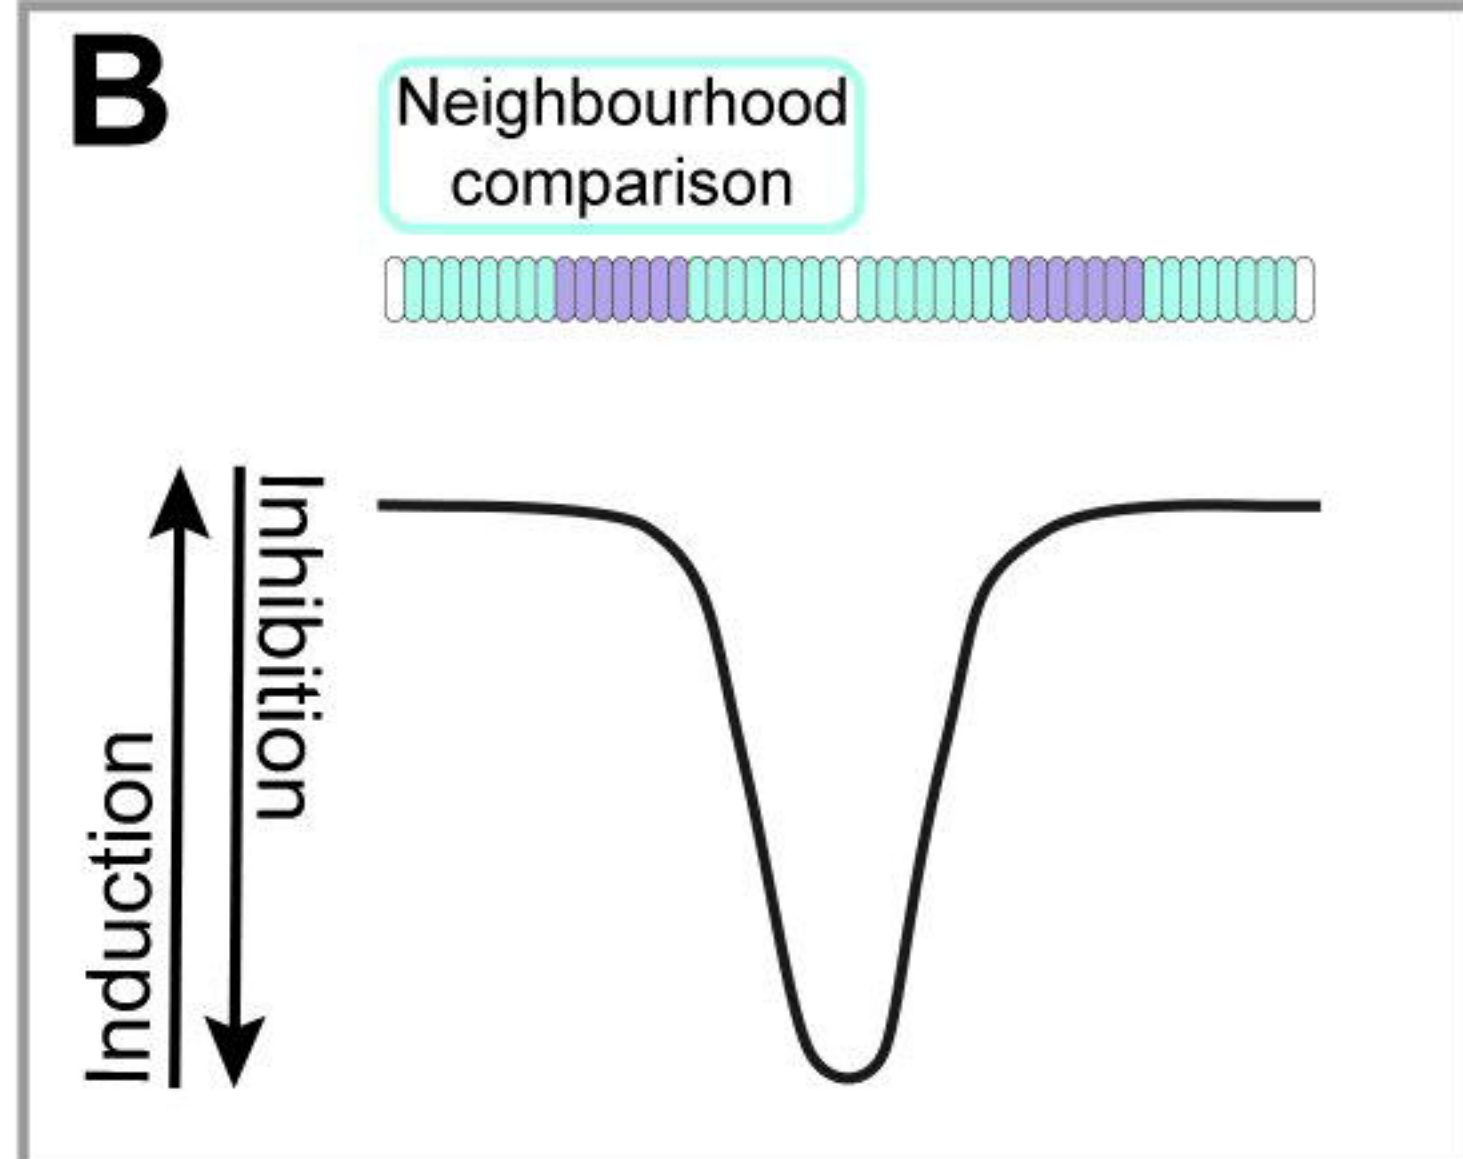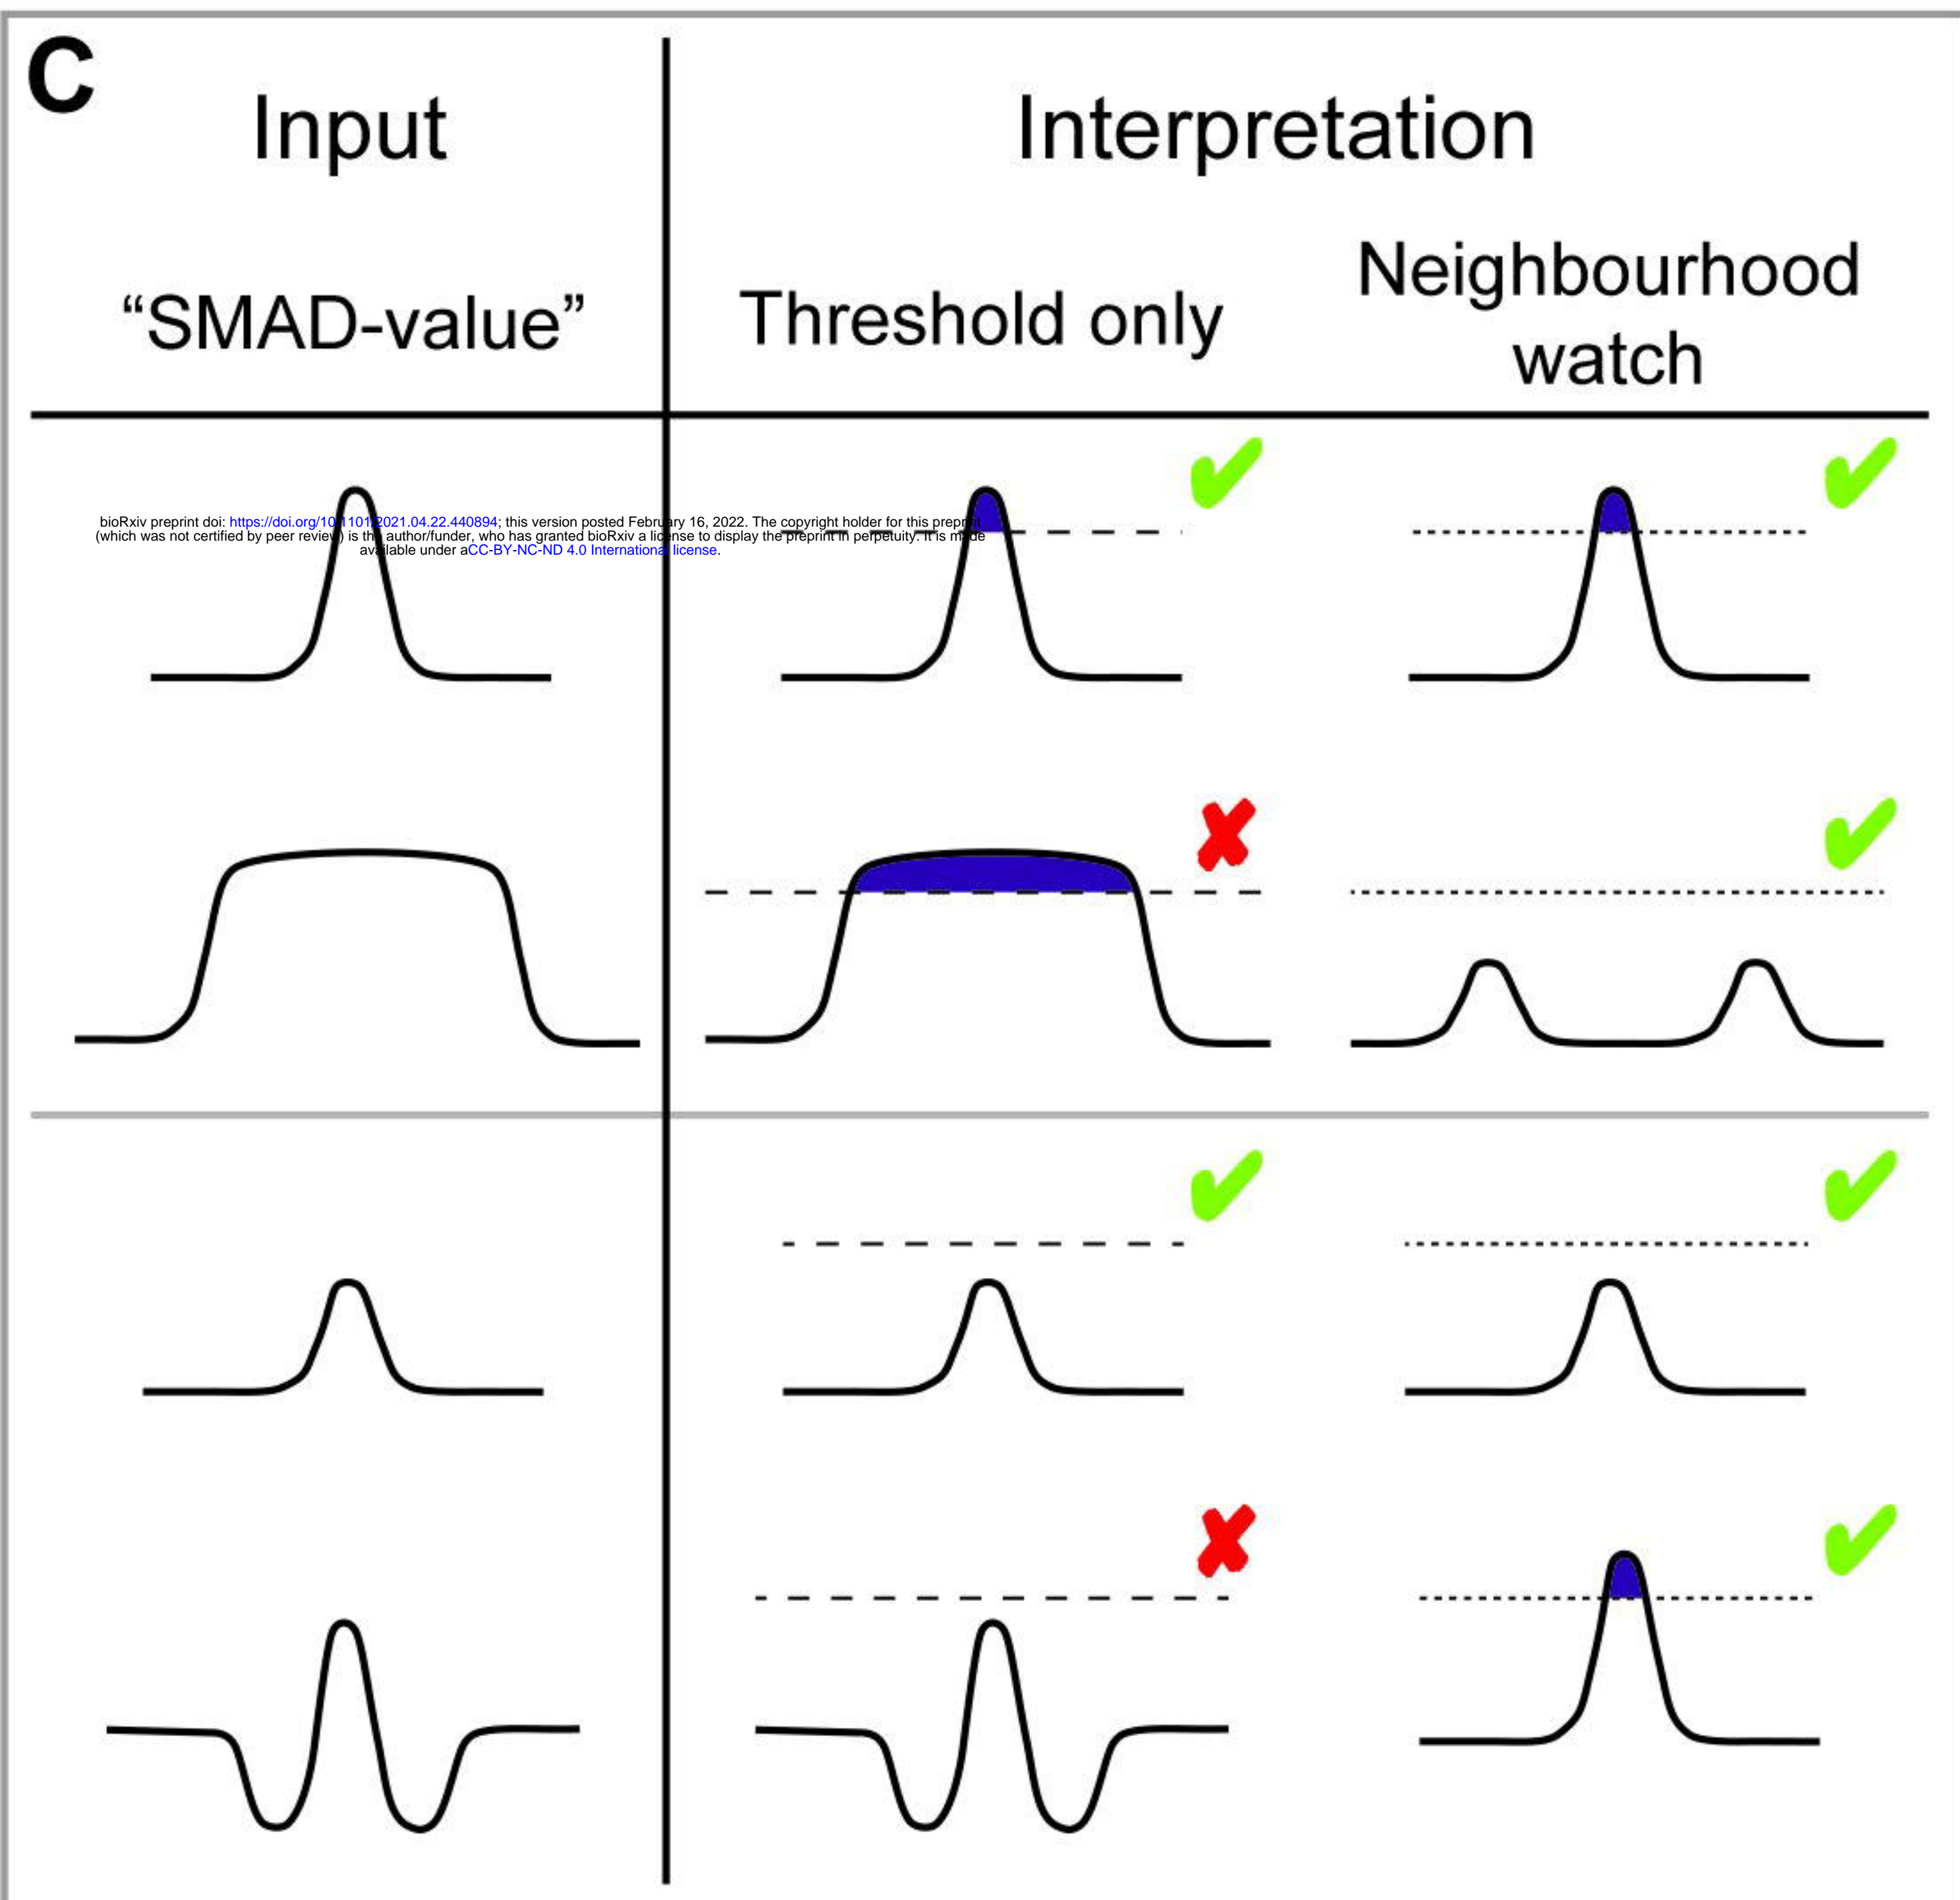

Source: https://www.biorxiv.org/content/10.1101/2021.04.22.440894v3.full.pdf
